# Supplementary material for: Sesquiterpenoids isolated from the rhizome ofCurcuma phaeocaulisValeton: antitumor activity,in silicomolecular docking and molecular dynamics study
Source: Royal Society of Chemistry journal article supplement (doi:10.1039/d2nj06011f), 2023-01-01
Supplement: d2nj06011f1.pdf [file d2nj06011f1.pdf]

## Electronic Supplementary Information of *New Journal of Chemistry*

### **Sesquiterpenoids isolated from the rhizome of *Curcuma phaeocaulis* Valetton: antitumor activity, in silico molecular docking and molecular dynamics study**

Xiangjian Zhong<sup>#</sup>, Xin Yan<sup>#</sup>, Weirui Liu, Yuxin Tian, Ruolan Song, Ying Dong, Xueyang Ren, Yuan Zheng, Dongjie Shang, Fang Lv, Xianxian Li, Qingyue Deng, Yingyu He, Ruijuan Yuan<sup>\*</sup>, Gaimei She<sup>\*</sup>

School of Chinese Materia Medica, Beijing University of Chinese Medicine, Beijing 102488, China.

<sup>#</sup> These authors contributed equally to this work.

<sup>\*</sup> Corresponding author.

## The List of Contents

| No. | Contents                                                                                                                                                                                                                                                             | Page |
|-----|----------------------------------------------------------------------------------------------------------------------------------------------------------------------------------------------------------------------------------------------------------------------|------|
| 1   | <b>Table S1.</b> Cartesian Coordinates and Equilibrium Populations of Low-energy Conformers of 1 <i>S</i> , 4 <i>S</i> , 5 <i>S</i> , 10 <i>R</i> in CH <sub>3</sub> OH of Compound <b>1</b> .                                                                       | S6   |
| 2   | <b>Table S2.</b> Free Energy Summary of Conformer Set of Compound <b>1</b>                                                                                                                                                                                           | S9   |
| 3   | <b>Figure S1.</b> The Experimental ECD Spectrum of <b>1</b> (black), and the Calculated ECD Spectra of (1 <i>R</i> , 4 <i>R</i> , 5 <i>R</i> , 10 <i>S</i> )- <b>1</b> (dash red) and (1 <i>S</i> , 5 <i>S</i> , 6 <i>S</i> , 10 <i>R</i> )- <b>1</b> (dash blue)    | S9   |
| 4   | <b>Table S3.</b> Cartesian Coordinates and Equilibrium Populations of Low-energy Conformers of 1 <i>S</i> ,4 <i>S</i> ,5 <i>S</i> ,10 <i>S</i> in CH <sub>3</sub> OH of Compound <b>19</b>                                                                           | S9   |
| 5   | <b>Table S4.</b> Free Energy Summary of Conformer Set of Compound <b>19</b>                                                                                                                                                                                          | S13  |
| 6   | <b>Figure S2.</b> The Experimental ECD Spectrum of <b>19</b> (black), and the Calculated ECD Spectra of (1 <i>R</i> , 4 <i>R</i> , 5 <i>R</i> , 10 <i>R</i> )- <b>19</b> (dash red) and (1 <i>S</i> , 4 <i>S</i> , 5 <i>S</i> , 10 <i>S</i> )- <b>19</b> (dash blue) | S14  |
| 7   | <b>Table S5.</b> Cartesian Coordinates and Equilibrium Populations of Low-energy Conformers of 1 <i>S</i> ,4 <i>S</i> ,5 <i>S</i> ,10 <i>S</i> in CH <sub>3</sub> OH of Compound <b>20</b>                                                                           | S14  |
| 8   | <b>Table S6.</b> Free energy Summary of Conformer Set of Compound <b>20</b>                                                                                                                                                                                          | S15  |
| 9   | <b>Figure S3.</b> The Experimental ECD Spectrum of <b>20</b> (black), and the Calculated ECD Spectra of (1 <i>R</i> , 4 <i>R</i> , 5 <i>R</i> , 10 <i>R</i> )- <b>20</b> (dash red) and (1 <i>S</i> , 4 <i>S</i> , 5 <i>S</i> , 10 <i>S</i> )- <b>20</b> (dash blue) | S16  |
| 10  | <b>Table S7.</b> Antitumor activities of the isolated compounds against MCF-7, BGC823, HeLa, A549, HepG2 cell line                                                                                                                                                   | S16  |
| 11  | <b>Figure S4.</b> The HR-ESI-MS Spectrum of Compound <b>1</b>                                                                                                                                                                                                        | S17  |
| 12  | <b>Figure S5.</b> The IR Spectrum of Compound <b>1</b>                                                                                                                                                                                                               | S17  |
| 13  | <b>Figure S6.</b> The UV Spectrum of Compound <b>1</b>                                                                                                                                                                                                               | S18  |
| 14  | <b>Figure S7</b> The <sup>1</sup> H NMR Spectrum of Compound <b>1</b> in CD <sub>3</sub> OD                                                                                                                                                                          | S18  |
| 15  | <b>Figure S8.</b> The <sup>13</sup> C NMR Spectrum of Compound <b>1</b> in CD <sub>3</sub> OD                                                                                                                                                                        | S19  |
| 16  | <b>Figure S9.</b> The DEPT Spectrum of Compound <b>1</b> in CD <sub>3</sub> OD                                                                                                                                                                                       | S19  |

|    |                                                                                                                |            |
|----|----------------------------------------------------------------------------------------------------------------|------------|
| 17 | <b>Figure S10.</b> The HSQC Spectrum of Compound <b>1</b> in CD <sub>3</sub> OD                                | <b>S20</b> |
| 18 | <b>Figure S11.</b> The <sup>1</sup> H- <sup>1</sup> H COSY Spectrum of Compound <b>1</b> in CD <sub>3</sub> OD | <b>S20</b> |
| 19 | <b>Figure S12.</b> The HMBC Spectrum of Compound <b>1</b> in CD <sub>3</sub> OD                                | <b>S21</b> |
| 20 | <b>Figure S13.</b> The NOESY Spectrum of Compound <b>1</b> in CD <sub>3</sub> OD                               | <b>S21</b> |
| 21 | <b>Figure S14.</b> The <sup>1</sup> H NMR Spectrum of Compound <b>2</b> in CD <sub>3</sub> OD                  | <b>S22</b> |
| 22 | <b>Figure S15.</b> The <sup>13</sup> C NMR Spectrum of Compound <b>2</b> in CD <sub>3</sub> OD                 | <b>S22</b> |
| 23 | <b>Figure S16.</b> The <sup>1</sup> H NMR Spectrum of Compound <b>3</b> in CD <sub>3</sub> OD                  | <b>S23</b> |
| 24 | <b>Figure S17.</b> The <sup>13</sup> C NMR Spectrum of Compound <b>3</b> in CD <sub>3</sub> OD                 | <b>S23</b> |
| 25 | <b>Figure S18.</b> The <sup>1</sup> H NMR Spectrum of Compound <b>4</b> in CD <sub>3</sub> OD                  | <b>S24</b> |
| 26 | <b>Figure S19.</b> The <sup>13</sup> C NMR Spectrum of Compound <b>4</b> in CD <sub>3</sub> OD                 | <b>S24</b> |
| 27 | <b>Figure S20.</b> The <sup>1</sup> H NMR Spectrum of Compound <b>5</b> in CD <sub>3</sub> Cl <sub>3</sub>     | <b>S25</b> |
| 28 | <b>Figure S21.</b> The <sup>13</sup> C NMR Spectrum of Compound <b>5</b> in CD <sub>3</sub> Cl <sub>3</sub>    | <b>S25</b> |
| 29 | <b>Figure S22.</b> The <sup>1</sup> H NMR Spectrum of Compound <b>6</b> in CD <sub>3</sub> OD                  | <b>S26</b> |
| 30 | <b>Figure S23.</b> The <sup>13</sup> C NMR Spectrum of Compound <b>6</b> in CD <sub>3</sub> OD                 | <b>S26</b> |
| 31 | <b>Figure S24.</b> The <sup>1</sup> H NMR Spectrum of Compound <b>7</b> in CD <sub>3</sub> OD                  | <b>S27</b> |
| 32 | <b>Figure S25.</b> The <sup>13</sup> C NMR Spectrum of Compound <b>7</b> in CD <sub>3</sub> OD                 | <b>S27</b> |
| 33 | <b>Figure S26.</b> The <sup>1</sup> H NMR Spectrum of Compound <b>8</b> in CD <sub>3</sub> OD                  | <b>S28</b> |
| 34 | <b>Figure S27.</b> The <sup>13</sup> C NMR Spectrum of Compound <b>8</b> in CD <sub>3</sub> OD                 | <b>S28</b> |
| 35 | <b>Figure S28.</b> The <sup>1</sup> H NMR Spectrum of Compound <b>9</b> in CD <sub>3</sub> Cl <sub>3</sub>     | <b>S29</b> |
| 36 | <b>Figure S29.</b> The <sup>13</sup> C NMR Spectrum of Compound <b>9</b> in CD <sub>3</sub> Cl <sub>3</sub>    | <b>S29</b> |
| 37 | <b>Figure S30.</b> The <sup>1</sup> H NMR Spectrum of Compound <b>10</b> in CD <sub>3</sub> OD                 | <b>S30</b> |
| 38 | <b>Figure S31.</b> The <sup>13</sup> C NMR Spectrum of Compound <b>10</b> in CD <sub>3</sub> OD                | <b>S30</b> |
| 39 | <b>Figure S32.</b> The <sup>1</sup> H NMR Spectrum of Compound <b>11</b> in CD <sub>3</sub> OD                 | <b>S31</b> |

|    |                                                                                                                  |            |
|----|------------------------------------------------------------------------------------------------------------------|------------|
| 40 | <b>Figure S33.</b> The $^{13}\text{C}$ NMR Spectrum of Compound <b>11</b> in $\text{CD}_3\text{OD}$              | <b>S31</b> |
| 41 | <b>Figure S34.</b> The $^1\text{H}$ NMR Spectrum of Compound <b>12</b> in $\text{CD}_3\text{Cl}_3$               | <b>S32</b> |
| 42 | <b>Figure S35.</b> The $^{13}\text{C}$ NMR Spectrum of Compound <b>12</b> in $\text{CD}_3\text{Cl}_3$            | <b>S32</b> |
| 43 | <b>Figure S36.</b> The $^1\text{H}$ NMR Spectrum of Compound <b>13</b> in $\text{CD}_3\text{OD}$                 | <b>S33</b> |
| 44 | <b>Figure S37.</b> The $^{13}\text{C}$ NMR Spectrum of Compound <b>13</b> in $\text{CD}_3\text{OD}$              | <b>S33</b> |
| 45 | <b>Figure S38.</b> The $^1\text{H}$ NMR Spectrum of Compound <b>14</b> in $\text{CD}_3\text{OD}$                 | <b>S34</b> |
| 46 | <b>Figure S39.</b> The $^{13}\text{C}$ NMR Spectrum of Compound <b>14</b> in $\text{CD}_3\text{OD}$              | <b>S34</b> |
| 47 | <b>Figure S40.</b> The $^1\text{H}$ NMR Spectrum of Compound <b>15</b> in $\text{CD}_3\text{OD}$                 | <b>S35</b> |
| 48 | <b>Figure S41.</b> The $^{13}\text{C}$ NMR Spectrum of Compound <b>15</b> in $\text{CD}_3\text{OD}$              | <b>S35</b> |
| 49 | <b>Figure S42.</b> The $^1\text{H}$ NMR Spectrum of Compound <b>16</b> in $\text{CD}_3\text{OD}$                 | <b>S36</b> |
| 50 | <b>Figure S43.</b> The $^{13}\text{C}$ NMR Spectrum of Compound <b>16</b> in $\text{CD}_3\text{OD}$              | <b>S36</b> |
| 51 | <b>Figure S44.</b> The $^1\text{H}$ NMR Spectrum of Compound <b>17</b> in $\text{CD}_3\text{OD}$                 | <b>S37</b> |
| 52 | <b>Figure S45.</b> The $^{13}\text{C}$ NMR Spectrum of Compound <b>17</b> in $\text{CD}_3\text{OD}$              | <b>S37</b> |
| 53 | <b>Figure S46.</b> The $^1\text{H}$ NMR Spectrum of Compound <b>18</b> in $\text{CD}_3\text{OD}$                 | <b>S38</b> |
| 54 | <b>Figure S47.</b> The $^{13}\text{C}$ NMR Spectrum of Compound <b>18</b> in $\text{CD}_3\text{OD}$              | <b>S38</b> |
| 55 | <b>Figure S48.</b> The HR-ESI-MS Spectrum of Compound <b>19</b>                                                  | <b>S39</b> |
| 56 | <b>Figure S49.</b> The IR Spectrum of Compound <b>19</b>                                                         | <b>S39</b> |
| 57 | <b>Figure S50.</b> The UV Spectrum of Compound <b>19</b>                                                         | <b>S40</b> |
| 58 | <b>Figure S51.</b> The $^1\text{H}$ NMR Spectrum of Compound <b>19</b> in $\text{CD}_3\text{OD}$                 | <b>S40</b> |
| 59 | <b>Figure S52.</b> The $^{13}\text{C}$ NMR Spectrum of Compound <b>19</b> in $\text{CD}_3\text{OD}$              | <b>S41</b> |
| 60 | <b>Figure S53.</b> The DEPT Spectrum of Compound <b>19</b> in $\text{CD}_3\text{OD}$                             | <b>S41</b> |
| 61 | <b>Figure S54.</b> The HSQC Spectrum of Compound <b>19</b> in $\text{CD}_3\text{OD}$                             | <b>S42</b> |
| 62 | <b>Figure S55.</b> The $^1\text{H}$ - $^1\text{H}$ COSY Spectrum of Compound <b>19</b> in $\text{CD}_3\text{OD}$ | <b>S42</b> |

|    |                                                                                                                 |            |
|----|-----------------------------------------------------------------------------------------------------------------|------------|
| 63 | <b>Figure S56.</b> The HMBC Spectrum of Compound <b>19</b> in CD <sub>3</sub> OD                                | <b>S43</b> |
| 64 | <b>Figure S57.</b> The NOESY Spectrum of Compound <b>19</b> in CD <sub>3</sub> OD                               | <b>S43</b> |
| 65 | <b>Figure S58.</b> The HR-ESI-MS Spectrum of Compound <b>20</b>                                                 | <b>S44</b> |
| 66 | <b>Figure S59.</b> The IR Spectrum of Compound <b>20</b>                                                        | <b>S44</b> |
| 67 | <b>Figure S60.</b> The UV Spectrum of Compound <b>20</b>                                                        | <b>S45</b> |
| 68 | <b>Figure S61.</b> The <sup>1</sup> H NMR Spectrum of Compound <b>20</b> in CD <sub>3</sub> OD                  | <b>S45</b> |
| 69 | <b>Figure S62.</b> The <sup>13</sup> C NMR Spectrum of Compound <b>20</b> in CD <sub>3</sub> OD                 | <b>S46</b> |
| 70 | <b>Figure S63.</b> The DEPT Spectrum of Compound <b>20</b> in CD <sub>3</sub> OD                                | <b>S46</b> |
| 71 | <b>Figure S64.</b> The HSQC Spectrum of Compound <b>20</b> in CD <sub>3</sub> OD                                | <b>S47</b> |
| 72 | <b>Figure S65.</b> The <sup>1</sup> H- <sup>1</sup> H COSY Spectrum of Compound <b>20</b> in CD <sub>3</sub> OD | <b>S47</b> |
| 73 | <b>Figure S66.</b> The HMBC Spectrum of Compound <b>20</b> in CD <sub>3</sub> OD                                | <b>S48</b> |
| 74 | <b>Figure S67.</b> The NOESY Spectrum of Compound <b>20</b> in CD <sub>3</sub> OD                               | <b>S48</b> |
| 75 | <b>Figure S68.</b> The <sup>1</sup> H NMR Spectrum of Compound <b>21</b> in CD <sub>3</sub> OD                  | <b>S49</b> |
| 76 | <b>Figure S69.</b> The <sup>13</sup> C NMR Spectrum of Compound <b>21</b> in CD <sub>3</sub> OD                 | <b>S49</b> |
| 77 | <b>Figure S70.</b> The <sup>1</sup> H NMR Spectrum of Compound <b>22</b> in CD <sub>3</sub> Cl <sub>3</sub>     | <b>S50</b> |
| 78 | <b>Figure S71.</b> The <sup>13</sup> C NMR Spectrum of Compound <b>22</b> in CD <sub>3</sub> Cl <sub>3</sub>    | <b>S50</b> |
| 79 | <b>Figure S72.</b> The <sup>1</sup> H NMR Spectrum of Compound <b>23</b> in CD <sub>3</sub> Cl <sub>3</sub>     | <b>S51</b> |
| 80 | <b>Figure S73.</b> The <sup>13</sup> C NMR Spectrum of Compound <b>23</b> in CD <sub>3</sub> Cl <sub>3</sub>    | <b>S51</b> |

**Table S1.** Cartesian Coordinates and Equilibrium Populations of Low-energy Conformers of 1S, 4S, 5S, 10R in CH<sub>3</sub>OH of Compound **1**.

| Compound <b>1</b> conformer 1 |              |              | Compound <b>1</b> conformer 2 |   |              |              |              |
|-------------------------------|--------------|--------------|-------------------------------|---|--------------|--------------|--------------|
| C                             | -0.542352792 | -1.305018108 | -0.16767212                   | C | -0.900050662 | -1.414756852 | -0.45976036  |
| C                             | -0.903487757 | 0.040473604  | 0.555036837                   | C | -1.046634197 | -0.360861729 | 0.701750757  |
| C                             | -0.303969562 | 1.347577163  | 0.026940351                   | C | -0.163134445 | 0.888609579  | 0.706621669  |
| C                             | 1.2039931    | 1.347486173  | 0.073035989                   | C | 1.334450079  | 0.66567024   | 0.661618952  |
| C                             | 1.831060986  | 0.811714949  | -1.184173158                  | C | 1.793231828  | -0.755792498 | 0.492489505  |
| C                             | 1.66466857   | -0.707159242 | -1.357735497                  | C | 1.593158226  | -1.30336658  | -0.930231339 |
| C                             | 0.23694132   | -1.277526573 | -1.499536418                  | C | 0.17567965   | -1.178134856 | -1.528210392 |
| C                             | -1.887650595 | -2.075052109 | -0.261085084                  | C | -2.329148104 | -1.603467626 | -1.014092219 |
| C                             | -2.78889837  | -1.424121943 | 0.785986148                   | C | -3.226602393 | -1.26770086  | 0.173163421  |
| C                             | -2.444795646 | 0.065407569  | 0.677943228                   | C | -2.571524756 | -0.023954643 | 0.772807629  |
| C                             | 1.900042533  | 1.730893977  | 1.160751258                   | C | 2.160481595  | 1.729428647  | 0.727412315  |
| C                             | 3.403704905  | 1.703431026  | 1.213025442                   | C | 3.655545056  | 1.63386361   | 0.642606651  |
| C                             | 1.266308503  | 2.173367245  | 2.455214876                   | C | 1.621413097  | 3.132111699  | 0.894477748  |
| C                             | 0.374468194  | -2.715280995 | -2.024376756                  | C | 0.04340758   | -2.198269315 | -2.665082024 |
| H                             | 0.115601243  | -1.86207369  | 0.511546888                   | H | -0.613544116 | -2.364974972 | 0.012755986  |
| H                             | -0.551196938 | -0.066514041 | 1.590766727                   | H | -0.849331731 | -0.899169074 | 1.637979558  |
| O                             | -0.53128705  | -0.506362471 | -2.448900249                  | O | -0.040905607 | 0.144693471  | -2.072924101 |
| O                             | -2.75979655  | 0.7904167    | 1.886585779                   | O | -3.018392676 | 0.101954738  | 2.139617925  |
| C                             | -3.155371093 | 0.720653125  | -0.502793282                  | C | -2.974089326 | 1.231843618  | 0.001566003  |
| O                             | 3.826179136  | 0.404032804  | 1.699337753                   | O | 4.292270165  | 1.968091795  | 1.901486861  |
| H                             | -0.714639926 | 2.169405014  | 0.624266737                   | H | -0.431282348 | 1.541341252  | -0.129336643 |
| H                             | -0.622523449 | 1.504831381  | -1.007344177                  | H | -0.408341328 | 1.457990138  | 1.618365948  |
| H                             | 2.903324297  | 1.022309922  | -1.225519813                  | H | 2.847913614  | -0.87024898  | 0.757558665  |
| H                             | 1.373066776  | 1.309830971  | -2.049524847                  | H | 1.238605148  | -1.392965493 | 1.193367774  |
| H                             | 2.218922967  | -0.989716793 | -2.264267307                  | H | 1.86665299   | -2.366791162 | -0.923454112 |
| H                             | 2.15280318   | -1.224186325 | -0.520889383                  | H | 2.29140339   | -0.802444911 | -1.615864639 |
| H                             | -2.322816723 | -1.947855405 | -1.258753542                  | H | -2.496426189 | -2.615710993 | -1.394837998 |
| H                             | -1.761382842 | -3.149161284 | -0.094332674                  | H | -2.513683143 | -0.905269155 | -1.83912564  |
| H                             | -3.855684561 | -1.624464468 | 0.63095657                    | H | -3.185059997 | -2.075227175 | 0.916630252  |
| H                             | -2.515712418 | -1.766157242 | 1.793012766                   | H | -4.275099985 | -1.099284074 | -0.096188926 |
| H                             | 3.754536223  | 2.483527108  | 1.904988926                   | H | 4.035420323  | 2.378704962  | -0.067733677 |
| H                             | 3.855468634  | 1.899641302  | 0.232816707                   | H | 3.993889786  | 0.649157468  | 0.300366647  |
| H                             | 0.182701243  | 2.049506165  | 2.479054928                   | H | 1.001046191  | 3.427254358  | 0.037301002  |
| H                             | 1.687444122  | 1.59657966   | 3.289219697                   | H | 2.437051073  | 3.854927875  | 0.984207737  |
| H                             | 1.496756099  | 3.228052785  | 2.659090974                   | H | 0.98973302   | 3.230260755  | 1.785898518  |
| H                             | 0.926799983  | -2.713919493 | -2.971241985                  | H | 0.06030914   | -3.222847061 | -2.277907798 |
| H                             | -0.604880278 | -3.166903587 | -2.200175349                  | H | 0.880990966  | -2.086283208 | -3.365079419 |
| H                             | 0.92513322   | -3.33925694  | -1.311372662                  | H | -0.888795792 | -2.046610242 | -3.216475314 |
| H                             | -0.067514815 | -0.5478094   | -3.296031805                  | H | 0.575804563  | 0.254474952  | -2.808626008 |
| H                             | -3.71932695  | 0.897796563  | 1.919366069                   | H | -2.675963003 | 0.936608093  | 2.48589638   |

|                        |              |              |              |                        |              |              |              |
|------------------------|--------------|--------------|--------------|------------------------|--------------|--------------|--------------|
| H                      | -4.240992621 | 0.613561075  | -0.386895764 | H                      | -2.562383213 | 2.132860194  | 0.469180897  |
| H                      | -2.86203731  | 0.258010984  | -1.449385026 | H                      | -4.065926623 | 1.317128702  | -0.00768163  |
| H                      | -2.917139878 | 1.787149511  | -0.555360045 | H                      | -2.617126974 | 1.20020764   | -1.032262971 |
| H                      | 4.775532891  | 0.454883335  | 1.870422291  | H                      | 3.903989125  | 1.385947675  | 2.567746412  |
| Compound 1 conformer 3 |              |              |              | Compound 1 conformer 4 |              |              |              |
| C                      | -0.785456754 | -1.370015547 | -0.318744898 | C                      | -0.933246317 | -1.398728157 | -0.439606496 |
| C                      | -0.842967057 | -0.035465717 | 0.499782726  | C                      | -1.129401861 | -0.35182524  | 0.720054155  |
| C                      | -0.249992869 | 1.213520092  | -0.188507265 | C                      | -0.179235021 | 0.842838725  | 0.826363072  |
| C                      | 1.257381096  | 1.243631658  | -0.083945622 | C                      | 1.300673546  | 0.535066844  | 0.93431084   |
| C                      | 1.974361995  | 0.437546683  | -1.128508477 | C                      | 1.696760644  | -0.904958864 | 0.765584342  |
| C                      | 1.671582643  | -1.069230885 | -1.057851562 | C                      | 1.593509616  | -1.405792115 | -0.685944728 |
| C                      | 0.249366811  | -1.51923423  | -1.453761722 | C                      | 0.243459431  | -1.202379051 | -1.40428665  |
| C                      | -2.244559964 | -1.637843847 | -0.807527844 | C                      | -2.313703883 | -1.507125842 | -1.123467771 |
| C                      | -3.048212257 | -0.400859853 | -0.400046959 | C                      | -3.298154404 | -1.125345623 | -0.022504889 |
| C                      | -2.350003145 | 0.093715084  | 0.858987717  | C                      | -2.63142671  | 0.073778348  | 0.651055269  |
| C                      | 1.866833538  | 1.906586579  | 0.920315666  | C                      | 2.166021207  | 1.551762136  | 1.120220759  |
| C                      | 3.359144413  | 1.961115635  | 1.096475115  | C                      | 3.653452549  | 1.392108021  | 1.200379935  |
| C                      | 1.103540724  | 2.634502983  | 2.00663028   | C                      | 1.682544536  | 2.981630065  | 1.214659369  |
| C                      | 0.318318468  | -3.000618485 | -1.852743892 | C                      | 0.164410553  | -2.198847561 | -2.567333051 |
| H                      | -0.515626248 | -2.15655519  | 0.395265751  | H                      | -0.737164628 | -2.367500142 | 0.040786023  |
| H                      | -0.288088699 | -0.161577566 | 1.440632253  | H                      | -1.05465788  | -0.909842361 | 1.66258055   |
| O                      | -0.222063673 | -0.757090865 | -2.588216784 | O                      | 0.140885039  | 0.136747878  | -1.942776663 |
| O                      | -2.652087596 | -0.893533976 | 1.881056248  | O                      | -3.197211892 | 0.216763475  | 1.97099216   |
| C                      | -2.828839731 | 1.456203578  | 1.337749114  | C                      | -2.886353416 | 1.356182724  | -0.139170821 |
| O                      | 3.803735474  | 1.087605167  | 2.164878733  | O                      | 4.23179007   | 1.929616265  | -0.017788411 |
| H                      | -0.655939662 | 2.108568214  | 0.28688115   | H                      | -0.480371488 | 1.424975263  | 1.71283379   |
| H                      | -0.547229359 | 1.237152131  | -1.242245768 | H                      | -0.323160482 | 1.51133508   | -0.027266327 |
| H                      | 3.057868186  | 0.554494633  | -1.053954524 | H                      | 1.054666586  | -1.530746632 | 1.39894703   |
| H                      | 1.684202783  | 0.800630019  | -2.12389695  | H                      | 2.719409057  | -1.08331609  | 1.106290448  |
| H                      | 1.887723257  | -1.445878142 | -0.048414947 | H                      | 1.81726917   | -2.480748141 | -0.68292085  |
| H                      | 2.376293676  | -1.572015843 | -1.735168005 | H                      | 2.372767529  | -0.924375517 | -1.293629652 |
| H                      | -2.287294753 | -1.807121925 | -1.885584076 | H                      | -2.499294455 | -2.508456038 | -1.524298057 |
| H                      | -2.646531899 | -2.528990343 | -0.316183965 | H                      | -2.384837074 | -0.800536169 | -1.959082019 |
| H                      | -4.111462766 | -0.601215406 | -0.226067399 | H                      | -3.376674952 | -1.938778473 | 0.711624886  |
| H                      | -2.970291507 | 0.380566042  | -1.166255905 | H                      | -4.304507581 | -0.89307959  | -0.388018538 |
| H                      | 3.656966583  | 2.967687845  | 1.414042282  | H                      | 4.033948435  | 1.963520354  | 2.06189214   |
| H                      | 3.904252776  | 1.730603847  | 0.174720535  | H                      | 3.959727831  | 0.348206316  | 1.326080463  |
| H                      | 0.794346199  | 3.63625222   | 1.677558821  | H                      | 1.159850829  | 3.296002026  | 0.301980126  |
| H                      | 1.739790726  | 2.76448176   | 2.887654133  | H                      | 2.521023057  | 3.666660971  | 1.368002924  |
| H                      | 0.204022568  | 2.101590955  | 2.326218668  | H                      | 0.97615335   | 3.119947263  | 2.04346925   |
| H                      | 0.760129917  | -3.596038433 | -1.045823121 | H                      | 0.097800742  | -3.228555788 | -2.199488427 |
| H                      | 0.94652554   | -3.118191538 | -2.743723937 | H                      | 1.065876186  | -2.117206663 | -3.187466807 |
| H                      | -0.676232624 | -3.398746324 | -2.074896806 | H                      | -0.706206549 | -1.992562438 | -3.19608773  |
| H                      | 0.399356156  | -0.904970621 | -3.313307201 | H                      | 0.842792822  | 0.233501008  | -2.5996417   |
| H                      | -2.149887322 | -0.650430784 | 2.670215347  | H                      | -2.858186856 | 1.03803844   | 2.350574251  |

|                        |              |              |              |   |              |              |              |
|------------------------|--------------|--------------|--------------|---|--------------|--------------|--------------|
| H                      | -2.773828876 | 2.209795828  | 0.547023576  | H | -3.965668987 | 1.503278807  | -0.25210416  |
| H                      | -2.237327984 | 1.806378204  | 2.192722028  | H | -2.433148248 | 1.313323136  | -1.134333471 |
| H                      | -3.873924472 | 1.373984792  | 1.65432611   | H | -2.472775276 | 2.228693028  | 0.378397917  |
| H                      | 3.464105689  | 0.20701157   | 1.957241379  | H | 5.18459517   | 2.000730322  | 0.122137522  |
| Compound 1 conformer 5 |              |              |              |   |              |              |              |
| C                      | -0.589687068 | -1.266253629 | -0.16822939  | H | 2.912547542  | 0.933103283  | -1.294856751 |
| C                      | -0.897851518 | 0.093827599  | 0.550886181  | H | 1.379097496  | 1.276189352  | -2.083855364 |
| C                      | -0.257607912 | 1.376688544  | 0.010647717  | H | 2.13506318   | -1.05123442  | -2.325459672 |
| C                      | 1.2497891    | 1.313129678  | 0.040403206  | H | 2.102102892  | -1.291151676 | -0.582136025 |
| C                      | 1.835416348  | 0.758157027  | -1.229736129 | H | -1.867846846 | -3.067895016 | -0.046016434 |
| C                      | 1.612228762  | -0.752837864 | -1.405482652 | H | -2.41067809  | -1.865184412 | -1.21732717  |
| C                      | 0.162446438  | -1.272763731 | -1.51559269  | H | -3.900711586 | -1.469098304 | 0.687135612  |
| C                      | -1.961314684 | -1.992691299 | -0.225904117 | H | -2.551539296 | -1.638053614 | 1.833381085  |
| C                      | -2.826839117 | -1.300528942 | 0.825217514  | H | 3.939234147  | 1.553753314  | 0.208898057  |
| C                      | -2.44221214  | 0.171040313  | 0.691707668  | H | 3.884243067  | 2.355497224  | 1.785684656  |
| C                      | 1.968485508  | 1.656237881  | 1.128293422  | H | 1.637125875  | 3.187094834  | 2.606383998  |
| C                      | 3.467483478  | 1.52927631   | 1.197643011  | H | 1.76486717   | 1.557977879  | 3.260047024  |
| C                      | 1.361418268  | 2.139740955  | 2.421631896  | H | 0.273883079  | 2.061241761  | 2.45633955   |
| C                      | 0.238174908  | -2.716264561 | -2.037313931 | H | 0.778610332  | -3.35734755  | -1.331699058 |
| H                      | 0.064733549  | -1.837964439 | 0.50223812   | H | 0.773335326  | -2.738143038 | -2.993757737 |
| H                      | -0.539324944 | -0.02086196  | 1.583338036  | H | -0.759785362 | -3.132865559 | -2.193943271 |
| O                      | -0.5953283   | -0.476776451 | -2.452443628 | H | -0.154135689 | -0.542698667 | -3.310027669 |
| O                      | -2.821843174 | 0.848502187  | 1.907722716  | H | -2.680597675 | 1.795095296  | 1.775197783  |
| C                      | -3.13595772  | 0.833884241  | -0.494207528 | H | -2.821421289 | 0.38250046   | -1.439373949 |
| O                      | 3.871636098  | 0.330529457  | 1.906284649  | H | -4.22157525  | 0.730304899  | -0.392583285 |
| H                      | -0.58451064  | 1.546110216  | -1.018903457 | H | -2.894048619 | 1.901955712  | -0.540014915 |
| H                      | -0.623633265 | 2.220211401  | 0.609394514  | H | 3.442527619  | -0.411434689 | 1.460388408  |

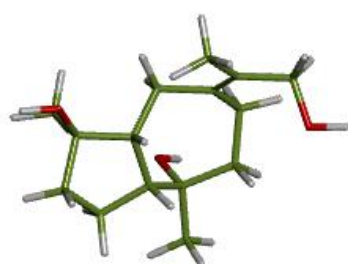

conformer 1

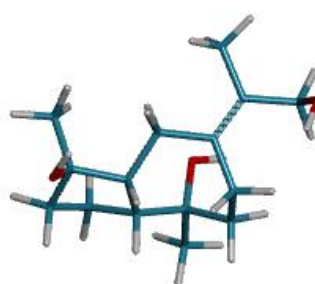

conformer 2

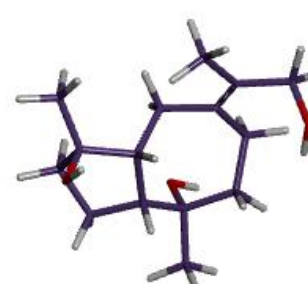

conformer 3

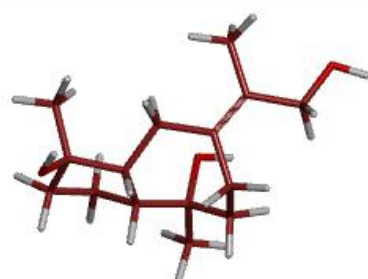

conformer 4

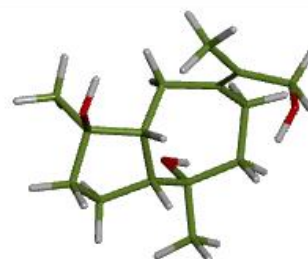

conformer 5



The optimized conformers of (1*S*, 4*S*, 5*S*, 10*R*)-**1**

**Table S2.** Free Energy Summary of Conformer set of Compound **1**

|                                                    | Conformer No. | Energy (a.u.)     | Relative Energy (kcal/mol) | Equilibrium Mole Fraction |
|----------------------------------------------------|---------------|-------------------|----------------------------|---------------------------|
| 1 <i>S</i> , 4 <i>S</i> , 5 <i>S</i> , 10 <i>R</i> | 1             | -509883.135239208 | 0.02974544698              | 45.94%                    |
|                                                    | 2             | -509881.239573289 | 1.92541136587              | 1.87%                     |
|                                                    | 3             | -509881.239060502 | 1.92592415347              | 1.87%                     |
|                                                    | 4             | -509880.895126919 | 2.26985773561              | 1.04%                     |
|                                                    | 5             | -509883.164984655 | 0.00000000000              | 48.30%                    |

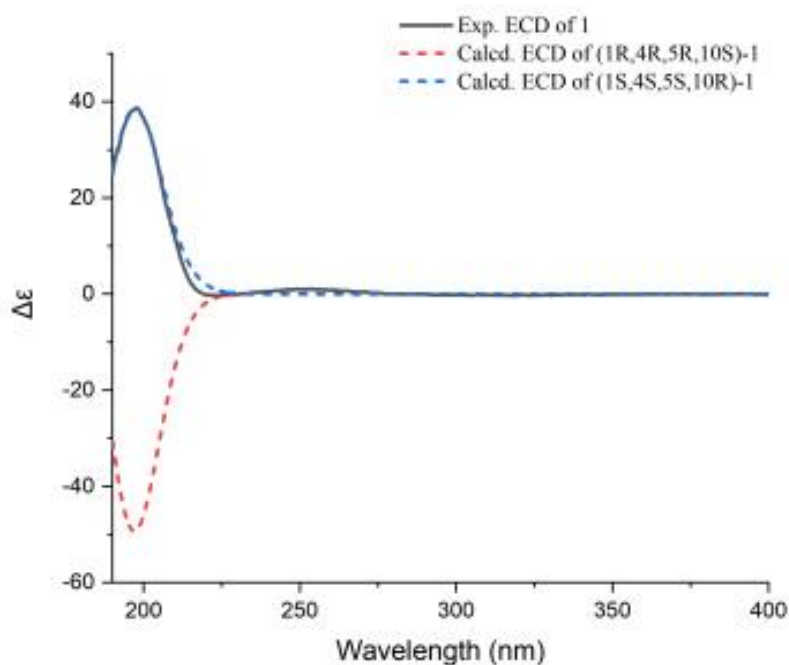

**Figure S1.** The Experimental ECD Spectrum of **1** (black), and the Calculated ECD Spectra of (1*R*, 4*R*, 5*R*, 10*S*)-**1** (dash red) and (1*S*, 4*S*, 5*S*, 10*R*)-**1** (dash blue)

**Table S3.** Cartesian Coordinates and Equilibrium Populations of Low-energy Conformers of 1*S*,4*S*,5*S*,10*S* in CH<sub>3</sub>OH of Compound **19**

| Compound <b>19</b> conformer 1 |              |              |              | Compound <b>19</b> conformer 2 |              |              |              |
|--------------------------------|--------------|--------------|--------------|--------------------------------|--------------|--------------|--------------|
| C                              | -3.152444643 | -1.44660071  | 0.010810918  | C                              | -3.143030241 | -1.499052726 | 0.052565127  |
| C                              | -3.250069877 | -0.033563936 | -0.561438193 | C                              | -3.316678195 | -0.032827621 | -0.337981954 |
| C                              | -2.118837381 | 0.882890144  | -0.076041897 | C                              | -2.175762477 | 0.858751814  | 0.170948733  |

|                         |              |              |              |                         |              |              |              |
|-------------------------|--------------|--------------|--------------|-------------------------|--------------|--------------|--------------|
| C                       | -0.747331274 | 0.192058557  | -0.318584264 | C                       | -0.817151055 | 0.261624674  | -0.268416879 |
| C                       | -0.610665539 | -1.288497287 | 0.136015065  | C                       | -0.604413036 | -1.252866917 | 0.005049344  |
| C                       | -1.823254055 | -2.07220173  | -0.394145641 | C                       | -1.837350312 | -2.024123213 | -0.518565939 |
| C                       | 0.434673501  | 1.021845642  | 0.1838253    | C                       | 0.380355164  | 1.075889403  | 0.226733735  |
| C                       | 1.764947193  | 0.394093682  | -0.150246111 | C                       | 1.698697392  | 0.535115014  | -0.269552246 |
| C                       | 1.843382656  | -0.902848404 | -0.467671076 | C                       | 1.782853615  | -0.712586549 | -0.740659221 |
| C                       | 0.66727756   | -1.83334827  | -0.537298578 | C                       | 0.628240856  | -1.668599191 | -0.82605382  |
| C                       | 2.979990723  | 1.316530798  | -0.111387468 | C                       | 2.895916737  | 1.482060501  | -0.2005113   |
| C                       | 2.952364142  | 2.291337533  | -1.290774404 | C                       | 4.205097469  | 0.857078523  | -0.663409206 |
| C                       | 4.316243442  | 0.574871276  | -0.09154775  | C                       | 3.060270122  | 2.034712642  | 1.21954813   |
| O                       | 2.896405027  | 2.154575471  | 1.073196911  | O                       | 2.677877905  | 2.589090977  | -1.123257889 |
| O                       | -1.714422496 | -3.435666107 | 0.047492402  | O                       | -1.775150194 | -3.43149787  | -0.238294324 |
| C                       | -2.377743786 | 1.360188456  | 1.349218256  | C                       | -2.332516414 | 1.141182016  | 1.665714261  |
| C                       | -0.456199663 | -1.456123872 | 1.655701616  | C                       | -0.318783212 | -1.588137327 | 1.476661127  |
| H                       | -1.766046243 | -2.045294472 | -1.497917847 | H                       | -1.869685286 | -1.875494628 | -1.613439765 |
| H                       | -0.661308026 | 0.153967885  | -1.420025071 | H                       | -0.833104767 | 0.356152551  | -1.367340272 |
| O                       | -2.150164243 | 2.106815297  | -0.855324061 | O                       | -2.236784053 | 2.131435382  | -0.52895257  |
| H                       | -3.972789384 | -2.062535313 | -0.381172275 | H                       | -3.160147929 | -1.625573873 | 1.142428509  |
| H                       | -3.252797076 | -1.442455101 | 1.103496092  | H                       | -3.971442859 | -2.094101409 | -0.350109353 |
| H                       | -3.190719918 | -0.095141761 | -1.658554628 | H                       | -3.335929209 | 0.044875724  | -1.433704396 |
| H                       | -4.215400295 | 0.425498592  | -0.315808119 | H                       | -4.273446816 | 0.357287812  | 0.03367471   |
| H                       | 0.373447471  | 2.028709221  | -0.242867046 | H                       | 0.394472436  | 1.101143103  | 1.325034936  |
| H                       | 0.369430822  | 1.163284416  | 1.270843466  | H                       | 0.247041824  | 2.118200272  | -0.088768608 |
| H                       | 2.806452198  | -1.344743329 | -0.714395565 | H                       | 2.733865038  | -1.094806063 | -1.103740917 |
| H                       | 0.455963319  | -2.059696153 | -1.59550975  | H                       | 0.97390421   | -2.66266332  | -0.505943314 |
| H                       | 0.937977943  | -2.794342979 | -0.080809828 | H                       | 0.340131333  | -1.778920496 | -1.885105602 |
| H                       | 2.027295725  | 2.874247506  | -1.303926554 | H                       | 4.138062634  | 0.517443235  | -1.701368079 |
| H                       | 3.032047627  | 1.739798906  | -2.231976445 | H                       | 4.479427123  | 0.008421066  | -0.030780291 |
| H                       | 3.796732054  | 2.985494148  | -1.218207445 | H                       | 4.998531126  | 1.607608201  | -0.598135666 |
| H                       | 4.477380933  | 0.010366929  | -1.014870094 | H                       | 2.176215309  | 2.60035308   | 1.531851426  |
| H                       | 4.366958356  | -0.119518936 | 0.754287087  | H                       | 3.210171317  | 1.215765211  | 1.931664458  |
| H                       | 5.124579425  | 1.306168081  | 0.004985558  | H                       | 3.928462031  | 2.700555985  | 1.260539414  |
| H                       | 2.887593013  | 1.566227166  | 1.840264126  | H                       | 1.970402254  | 3.142433245  | -0.768920089 |
| H                       | -2.438653786 | -3.927651421 | -0.358931613 | H                       | -1.001244369 | -3.795299497 | -0.686408584 |
| H                       | -1.583592399 | 2.02633406   | 1.696653734  | H                       | -3.274618342 | 1.680330379  | 1.82443694   |
| H                       | -2.463545718 | 0.529931901  | 2.050829302  | H                       | -1.517971855 | 1.764579808  | 2.043791974  |
| H                       | -3.321546599 | 1.915267426  | 1.366131222  | H                       | -2.3777691   | 0.22862036   | 2.263199912  |
| H                       | 0.430487589  | -0.923864836 | 2.012344111  | H                       | -0.106891101 | -2.65709947  | 1.572361483  |
| H                       | -0.327779404 | -2.514794775 | 1.897205361  | H                       | -1.153444729 | -1.35900098  | 2.141450675  |
| H                       | -1.317328975 | -1.08922085  | 2.216716648  | H                       | 0.559646857  | -1.041955213 | 1.832943531  |
| H                       | -2.026989935 | 1.86560715   | -1.783585452 | H                       | -3.0713272   | 2.552895387  | -0.284178144 |
| Compound 19 conformer 3 |              |              |              | Compound 19 conformer 4 |              |              |              |
| C                       | -3.148837386 | -1.456201627 | 0.058899335  | C                       | -4.446350845 | -0.997456628 | -2.471453534 |
| C                       | -3.316685731 | 0.052868036  | -0.10679145  | C                       | -4.130301361 | -0.182158629 | -1.220490185 |
| C                       | -2.118911442 | 0.845465771  | 0.433722523  | C                       | -2.627574372 | -0.080870567 | -0.950961461 |

|                         |              |              |              |                         |              |              |              |
|-------------------------|--------------|--------------|--------------|-------------------------|--------------|--------------|--------------|
| C                       | -0.805738145 | 0.283930869  | -0.178292587 | C                       | -1.903952574 | 0.426581327  | -2.230509454 |
| C                       | -0.614217638 | -1.258900302 | -0.144522736 | C                       | -2.258964502 | -0.2811622   | -3.570076386 |
| C                       | -1.897756084 | -1.918133768 | -0.67812833  | C                       | -3.791135389 | -0.353251956 | -3.686566289 |
| C                       | 0.443163057  | 0.997109388  | 0.342558152  | C                       | -0.386188014 | 0.524181651  | -2.060104225 |
| C                       | 1.711152138  | 0.503502489  | -0.307546331 | C                       | 0.299899656  | 1.101789835  | -3.273811703 |
| C                       | 1.734223487  | -0.664956507 | -0.955653056 | C                       | -0.324016559 | 1.132944104  | -4.455969802 |
| C                       | 0.547550365  | -1.572098719 | -1.111713582 | C                       | -1.717940823 | 0.62906785   | -4.693221621 |
| C                       | 2.947401311  | 1.391837401  | -0.174057273 | C                       | 1.713539172  | 1.637469194  | -3.062657264 |
| C                       | 3.2265297    | 1.703644343  | 1.2966295    | C                       | 1.683940831  | 2.931807614  | -2.24720009  |
| C                       | 2.769484213  | 2.689203035  | -0.975723768 | C                       | 2.483642634  | 1.870325172  | -4.361972883 |
| O                       | 4.134069709  | 0.724975321  | -0.645869779 | O                       | 2.454242058  | 0.691604848  | -2.245101308 |
| O                       | -1.736241245 | -3.345212192 | -0.615987672 | O                       | -4.124138317 | -1.043493964 | -4.902774224 |
| C                       | -2.159913972 | 0.925528993  | 1.95607925   | C                       | -2.086185014 | -1.379707814 | -0.356931419 |
| C                       | -0.239764035 | -1.80775501  | 1.241477638  | C                       | -1.620828798 | -1.669437182 | -3.733422942 |
| H                       | -2.001992151 | -1.612679034 | -1.73552216  | H                       | -4.158572804 | 0.687422033  | -3.751015979 |
| H                       | -0.886365896 | 0.531033292  | -1.252636016 | H                       | -2.279082505 | 1.457493686  | -2.344140231 |
| O                       | -2.253952371 | 2.22929573   | 0.016707225  | O                       | -2.513697349 | 0.952264421  | 0.065199094  |
| H                       | -4.02263664  | -1.974152876 | -0.358276184 | H                       | -4.110261786 | -2.036802422 | -2.366512333 |
| H                       | -3.090285485 | -1.736418797 | 1.118122212  | H                       | -5.533040443 | -1.029723583 | -2.625369078 |
| H                       | -3.418854986 | 0.279226889  | -1.178920403 | H                       | -4.627444972 | -0.60449142  | -0.338884135 |
| H                       | -4.231767976 | 0.404020382  | 0.385437194  | H                       | -4.514588968 | 0.839070058  | -1.351723539 |
| H                       | 0.324675264  | 2.075152127  | 0.186366424  | H                       | 0.043520672  | -0.462663309 | -1.84298618  |
| H                       | 0.529371451  | 0.865720911  | 1.430247583  | H                       | -0.152117408 | 1.140002367  | -1.182923979 |
| H                       | 2.661256569  | -1.011901456 | -1.407772355 | H                       | 0.176519613  | 1.558268865  | -5.32311862  |
| H                       | 0.184305742  | -1.512765722 | -2.150953781 | H                       | -1.748564453 | 0.090151585  | -5.649140882 |
| H                       | 0.866563046  | -2.612950999 | -0.970921117 | H                       | -2.391463383 | 1.492557611  | -4.81995623  |
| H                       | 3.358570584  | 0.776783221  | 1.864890247  | H                       | 2.707256514  | 3.275361062  | -2.061239587 |
| H                       | 2.401626732  | 2.269014666  | 1.737641085  | H                       | 1.189042235  | 2.785343713  | -1.28338269  |
| H                       | 4.138593673  | 2.303662228  | 1.378105081  | H                       | 1.148410173  | 3.707902167  | -2.801577857 |
| H                       | 1.913274132  | 3.270320598  | -0.622420946 | H                       | 3.503883327  | 2.180388495  | -4.115989781 |
| H                       | 2.613973733  | 2.460047359  | -2.036525153 | H                       | 2.025885888  | 2.659702832  | -4.965660802 |
| H                       | 3.668504236  | 3.306244675  | -0.874354011 | H                       | 2.529321403  | 0.955372949  | -4.96284974  |
| H                       | 4.065139557  | 0.64040234   | -1.60607506  | H                       | 2.482210304  | -0.144258952 | -2.730160374 |
| H                       | -2.516197783 | -3.740766125 | -1.02483412  | H                       | -5.083991229 | -1.008598513 | -4.99905292  |
| H                       | -1.321446687 | 1.507634239  | 2.347834283  | H                       | -2.214654095 | -2.232264187 | -1.025989447 |
| H                       | -2.142818223 | -0.059968489 | 2.422897728  | H                       | -2.62747672  | -1.594463197 | 0.570797071  |
| H                       | -3.088653274 | 1.423785359  | 2.253488749  | H                       | -1.020361641 | -1.298108859 | -0.118521275 |
| H                       | 0.665126149  | -1.321369286 | 1.617190557  | H                       | -1.843993839 | -2.057781619 | -4.730922579 |
| H                       | -0.033465899 | -2.879000825 | 1.166790739  | H                       | -1.984750396 | -2.399390794 | -3.007910172 |
| H                       | -1.028014773 | -1.674722567 | 1.984567984  | H                       | -0.532924808 | -1.608618416 | -3.636945032 |
| H                       | -2.265037024 | 2.243544639  | -0.95015562  | H                       | -1.626311112 | 0.904106774  | 0.443058068  |
| Compound 19 conformer 5 |              |              |              | Compound 19 conformer 6 |              |              |              |
| C                       | -3.122209722 | -1.465067929 | 0.110260222  | C                       | -3.1257761   | -1.454339443 | 0.162123532  |
| C                       | -3.333147832 | 0.015062187  | -0.203377876 | C                       | -3.293482055 | 0.052029714  | -0.018363227 |
| C                       | -2.175672364 | 0.893865579  | 0.289515796  | C                       | -2.077340075 | 0.846615094  | 0.461933702  |

|   |              |              |              |   |              |              |              |
|---|--------------|--------------|--------------|---|--------------|--------------|--------------|
| C | -0.829524412 | 0.323702106  | -0.238953828 | C | -0.795984888 | 0.281463738  | -0.210844556 |
| C | -0.591017748 | -1.203284365 | -0.056888449 | C | -0.596303434 | -1.259023808 | -0.150921118 |
| C | -1.839741574 | -1.951957367 | -0.552719083 | C | -1.904759101 | -1.945307547 | -0.604468875 |
| C | 0.383872941  | 1.122495458  | 0.239537245  | C | 0.478261645  | 1.010886938  | 0.224342633  |
| C | 1.680959294  | 0.612829962  | -0.337745683 | C | 1.720208778  | 0.495896069  | -0.4627667   |
| C | 1.75421297   | -0.609418115 | -0.87527354  | C | 1.707872979  | -0.685999171 | -1.086876171 |
| C | 0.601635828  | -1.566692354 | -0.966225684 | C | 0.512250277  | -1.588498483 | -1.170789061 |
| C | 2.871398683  | 1.566432626  | -0.275749362 | C | 2.956515525  | 1.392875244  | -0.402399419 |
| C | 2.697715999  | 2.708674244  | -1.27864031  | C | 4.196414012  | 0.774638535  | -1.034862413 |
| C | 4.218962079  | 0.882913132  | -0.504610864 | C | 3.261166501  | 1.792274458  | 1.045482906  |
| O | 2.892181995  | 2.207707264  | 1.027998017  | O | 2.708966152  | 2.595386854  | -1.188450349 |
| O | -1.634296118 | -3.360312397 | -0.353330294 | O | -1.80520439  | -3.378649917 | -0.581294608 |
| C | -2.257427677 | 1.104139211  | 1.797977413  | C | -2.044215726 | 0.93424399   | 1.987075429  |
| C | -0.230249964 | -1.607001807 | 1.381631746  | C | -0.148003081 | -1.777500604 | 1.225153268  |
| H | -1.927736068 | -1.749262556 | -1.636019937 | H | -2.051800325 | -1.697196317 | -1.66616129  |
| H | -0.892368199 | 0.466243311  | -1.333317795 | H | -0.943615805 | 0.510283414  | -1.279620577 |
| O | -2.346011884 | 2.229589972  | -0.252506218 | O | -2.297732181 | 2.187236647  | -0.053941399 |
| H | -3.968806116 | -2.049514864 | -0.274068693 | H | -4.012566124 | -1.974862423 | -0.218946752 |
| H | -3.080407542 | -1.64040731  | 1.192461131  | H | -3.038856105 | -1.716157709 | 1.22589675   |
| H | -3.412543891 | 0.135314577  | -1.294470324 | H | -4.187612986 | 0.411308367  | 0.505375276  |
| H | -4.272032528 | 0.379710202  | 0.230783359  | H | -3.432813317 | 0.270066364  | -1.086397381 |
| H | 0.24601485   | 2.177461669  | -0.020998224 | H | 0.610983145  | 0.928883963  | 1.311970791  |
| H | 0.450080478  | 1.10120867   | 1.335322934  | H | 0.360889784  | 2.085353591  | 0.023677762  |
| H | 2.692967407  | -0.962488293 | -1.296701403 | H | 2.604317952  | -1.045282486 | -1.586630104 |
| H | 0.262537414  | -1.618156105 | -2.014071933 | H | 0.098776301  | -1.534466428 | -2.191373663 |
| H | 0.95217777   | -2.577820984 | -0.72137246  | H | 0.832363381  | -2.630398226 | -1.039527649 |
| H | 1.765230913  | 3.253018356  | -1.105376666 | H | 5.024809724  | 1.485357949  | -0.960022846 |
| H | 2.686375888  | 2.31038328   | -2.297273079 | H | 4.480796516  | -0.144940471 | -0.516242651 |
| H | 3.530978102  | 3.41384384   | -1.18655488  | H | 4.032615361  | 0.548508876  | -2.092676825 |
| H | 4.301581443  | 0.482482939  | -1.519453277 | H | 3.427414377  | 0.900258993  | 1.659455578  |
| H | 4.368528003  | 0.062198633  | 0.205501435  | H | 2.434646204  | 2.359650697  | 1.485851652  |
| H | 5.016872947  | 1.618753276  | -0.364496384 | H | 4.161457703  | 2.414546879  | 1.076884935  |
| H | 2.994881507  | 1.508887011  | 1.687997989  | H | 2.054883353  | 3.131173715  | -0.72222692  |
| H | -2.393293879 | -3.818348063 | -0.735344556 | H | -1.801522468 | -3.657677458 | 0.343625249  |
| H | -1.451294881 | 1.750668976  | 2.154948789  | H | -1.971234576 | -0.044599482 | 2.464464127  |
| H | -2.211351288 | 0.162101508  | 2.344781109  | H | -1.202605557 | 1.541692576  | 2.337090382  |
| H | -3.212007299 | 1.586307771  | 2.033744011  | H | -2.970516315 | 1.408118581  | 2.329160731  |
| H | 0.655769942  | -1.062720311 | 1.72111731   | H | -0.922624776 | -1.699057248 | 1.991225617  |
| H | 0.001625633  | -2.67510129  | 1.414836525  | H | 0.139386105  | -2.831888461 | 1.149573447  |
| H | -1.034718617 | -1.420322487 | 2.094756043  | H | 0.731210937  | -1.232028896 | 1.578927414  |
| H | -2.343702485 | 2.155880836  | -1.21663027  | H | -1.704637325 | 2.78912333   | 0.413513372  |

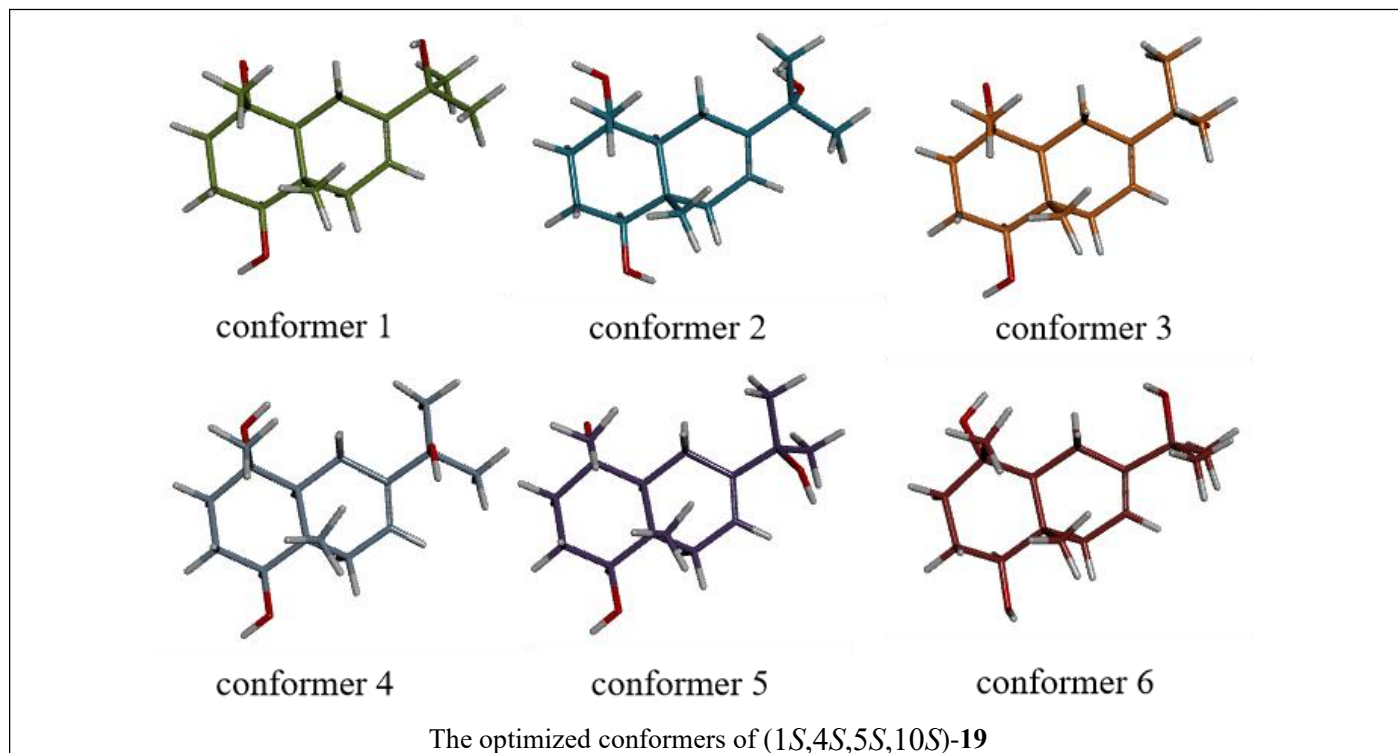

**Table S4.** Free energy summary of conformer set of compound **19**

|                                                    | Conformer No. | Energy (a.u.)     | Relative Energy (kcal/mol) | Equilibrium Mole Fraction |
|----------------------------------------------------|---------------|-------------------|----------------------------|---------------------------|
| 1 <i>S</i> , 4 <i>S</i> , 5 <i>S</i> , 10 <i>S</i> | 1             | -509894.839040418 | 0.291108009                | 22.51%                    |
|                                                    | 2             | -509894.070797766 | 1.059350661                | 6.15%                     |
|                                                    | 3             | -509895.130148427 | 0                          | 36.81%                    |
|                                                    | 4             | -509894.323651712 | 0.806496715                | 9.43%                     |
|                                                    | 5             | -509894.800863102 | 0.329285325                | 21.11%                    |
|                                                    | 6             | -509893.815545909 | 1.314602518                | 4.00%                     |

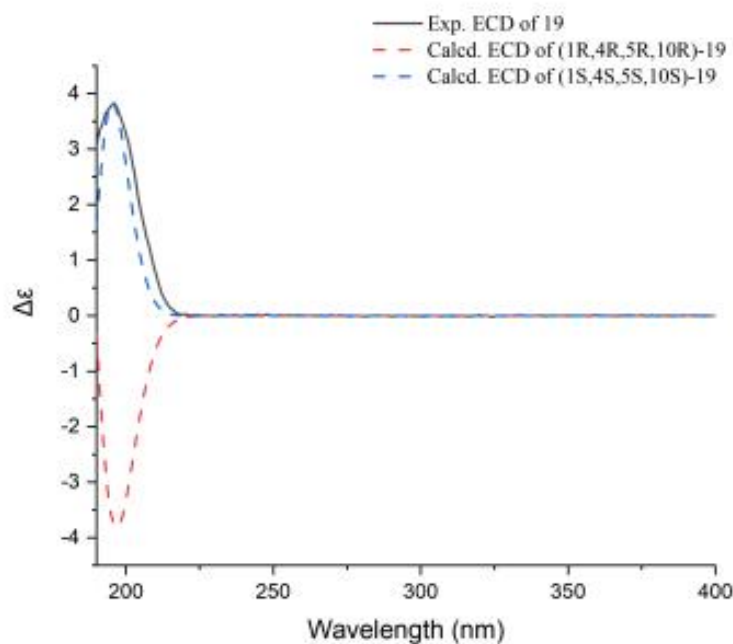

**Figure S2.** The experimental ECD spectrum of **19** (black), and the calculated ECD spectra of (1*R*, 4*R*, 5*R*, 10*R*)-**19** (dash red) and (1*S*, 4*S*, 5*S*, 10*S*)-**19** (dash blue)

**Table S5. Cartesian Coordinates and Equilibrium Populations of Low-energy Conformers of 1*S*,4*S*,5*S*,10*S* in CH<sub>3</sub>OH of Compound 20**

| Compound 20 conformer 1 |              |              |              | Compound 20 conformer 2 |              |              |              |
|-------------------------|--------------|--------------|--------------|-------------------------|--------------|--------------|--------------|
| C                       | 2.595233165  | 2.127128598  | 0.322497666  | C                       | 2.532786602  | 2.108218897  | 0.113876063  |
| C                       | 3.063416459  | 0.754404486  | -0.156320823 | C                       | 2.970583179  | 0.724352217  | -0.363438193 |
| C                       | 2.170217646  | -0.392482472 | 0.337579105  | C                       | 2.145970145  | -0.415646478 | 0.251983354  |
| C                       | 0.697040337  | -0.064786722 | -0.012879456 | C                       | 0.640661406  | -0.111667004 | 0.045099803  |
| C                       | 0.173049193  | 1.330619669  | 0.438657259  | C                       | 0.14808548   | 1.291732818  | 0.505127046  |
| C                       | 1.152992291  | 2.38756572   | -0.104175588 | C                       | 1.051832353  | 2.337858475  | -0.173500345 |
| C                       | -0.283984903 | -1.193390833 | 0.361431386  | C                       | -0.285091224 | -1.232977798 | 0.553167999  |
| C                       | -1.622888679 | -0.951614119 | -0.287993426 | C                       | -1.690893543 | -1.025879445 | 0.049274533  |
| C                       | -2.191381606 | 0.392347478  | 0.089359671  | C                       | -2.235308163 | 0.324452827  | 0.438632088  |
| C                       | -1.20047946  | 1.520575088  | -0.241587968 | C                       | -1.29144928  | 1.444578433  | -0.032239646 |
| C                       | -2.179159282 | -1.83112307  | -1.143176862 | C                       | -2.323563448 | -1.94132181  | -0.708171275 |
| C                       | -3.479593772 | -1.581633273 | -1.854800139 | C                       | -3.7162512   | -1.759879278 | -1.245939185 |
| C                       | -1.556279294 | -3.175786572 | -1.46086833  | C                       | -1.671300512 | -3.251932022 | -1.111788144 |
| O                       | 0.705416842  | 3.683768807  | 0.327284128  | O                       | 0.631912763  | 3.645046281  | 0.252146126  |
| C                       | 2.424857978  | -0.721457474 | 1.802757567  | C                       | 2.554521082  | -0.697608578 | 1.691798522  |
| C                       | -9.95428E-05 | 1.493595977  | 1.961951397  | C                       | 0.133123529  | 1.50597732   | 2.031575009  |
| H                       | 1.10913658   | 2.335818865  | -1.207599242 | H                       | 0.897946476  | 2.24311889   | -1.264212312 |
| H                       | 0.691809074  | -0.017034122 | -1.117725865 | H                       | 0.522704144  | -0.098004277 | -1.054396425 |
| O                       | 2.554422771  | -1.60303054  | -0.363309138 | O                       | 2.469087351  | -1.643445395 | -0.449396928 |
| O                       | -4.542303327 | -2.423049787 | -1.344199786 | O                       | -3.728159861 | -1.514121158 | -2.674223716 |

|   |              |              |              |   |              |              |              |
|---|--------------|--------------|--------------|---|--------------|--------------|--------------|
| H | 3.23918456   | 2.90582169   | -0.1079329   | H | 3.119462973  | 2.878009198  | -0.405394008 |
| H | 2.685644858  | 2.213833973  | 1.412240115  | H | 2.730424354  | 2.233917517  | 1.185383942  |
| H | 4.098507856  | 0.565847012  | 0.153908716  | H | 4.033620823  | 0.557693889  | -0.149979777 |
| H | 3.047230393  | 0.740045554  | -1.256484502 | H | 2.848756     | 0.672951682  | -1.455827428 |
| H | 0.14975854   | -2.145918255 | 0.053844197  | H | 0.12173553   | -2.194791641 | 0.237300594  |
| H | -0.411221456 | -1.232864712 | 1.452207034  | H | -0.297520788 | -1.236570875 | 1.651926246  |
| H | -2.380303954 | 0.394324129  | 1.173433361  | H | -2.328052851 | 0.372139396  | 1.533957178  |
| H | -3.150273521 | 0.5980281    | -0.391787401 | H | -3.231729308 | 0.509580575  | 0.031635487  |
| H | -1.624666617 | 2.48427798   | 0.062154421  | H | -1.693440813 | 2.41598965   | 0.277363984  |
| H | -1.056463643 | 1.553051395  | -1.331405871 | H | -1.261934553 | 1.437689614  | -1.131628813 |
| H | -3.382035446 | -1.862990353 | -2.910654828 | H | -4.229961164 | -0.905279363 | -0.804653114 |
| H | -3.78366953  | -0.530046039 | -1.818128444 | H | -4.313955517 | -2.658808332 | -1.026210011 |
| H | -0.692044842 | -3.07068135  | -2.1301681   | H | -0.767651482 | -3.098080951 | -1.713187934 |
| H | -2.284992832 | -3.818066813 | -1.96378774  | H | -2.358854438 | -3.862882117 | -1.706231511 |
| H | -1.21389664  | -3.704816518 | -0.566474826 | H | -1.382048699 | -3.850837944 | -0.240647026 |
| H | 1.308858324  | 4.337269932  | -0.047873422 | H | 1.189040325  | 4.289544969  | -0.201839101 |
| H | 1.782613435  | -1.541561636 | 2.137520591  | H | 1.944717099  | -1.496261204 | 2.124348873  |
| H | 2.24975642   | 0.138399367  | 2.4497688    | H | 2.459548959  | 0.187314897  | 2.321448431  |
| H | 3.468311068  | -1.032136853 | 1.920993036  | H | 3.601735351  | -1.017461189 | 1.707725657  |
| H | -0.359933809 | 0.578246701  | 2.437770141  | H | -0.209622396 | 0.618971418  | 2.569824611  |
| H | -0.7297656   | 2.282666017  | 2.168174751  | H | -0.547659316 | 2.325785551  | 2.280359225  |
| H | 0.928655907  | 1.780012016  | 2.459048945  | H | 1.114799758  | 1.772146123  | 2.428000771  |
| H | 2.423034516  | -1.448262659 | -1.308852309 | H | 2.230041496  | -1.521851719 | -1.378547632 |
| H | -4.594710453 | -2.253914385 | -0.394395323 | H | -3.381648623 | -2.30176206  | -3.112503019 |

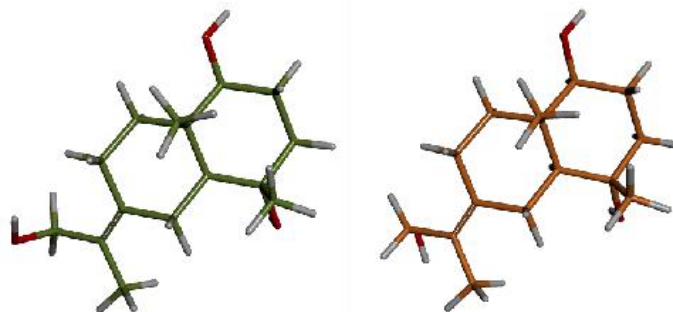

conformer 1

conformer 2

The optimized conformers of (1*S*,4*S*,5*S*,10*S*)-20

**Table S6. Free energy summary of conformer set of compound 20**

|                                                    | Conformer No. | Energy (a.u.)     | Relative Energy (kcal/mol) | Equilibrium Mole Fraction |
|----------------------------------------------------|---------------|-------------------|----------------------------|---------------------------|
| 1 <i>S</i> , 4 <i>S</i> , 5 <i>S</i> , 10 <i>S</i> | 1             | -509878.916036390 | 0.0000000000               | 69.50%                    |
|                                                    | 2             | -509878.422663161 | 0.49337322952              | 30.21%                    |

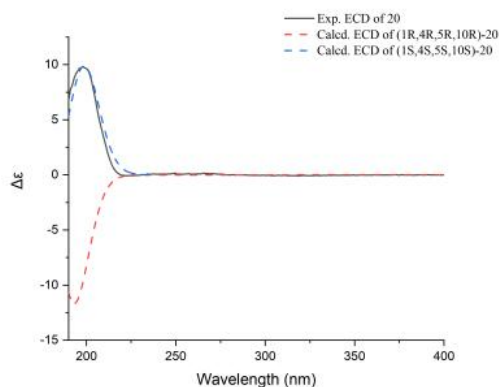

**Figure S3.** The Experimental ECD Spectrum of **20** (black), and the Calculated ECD Spectra of **(1R, 4R, 5R, 10R)-20** (dash red) and **(1S, 4S, 5S, 10S)-20** (dash blue)

**Table S7. Antitumor activities of the isolated compounds against MCF-7, BGC823, Hela, A549, HepG2 cell line**

| Compounds        | IC <sub>50</sub> of MCF-7 (μM) | IC <sub>50</sub> of BGC823 (μM) | IC <sub>50</sub> of Hela (μM) | IC <sub>50</sub> of A549 (μM) | IC <sub>50</sub> of HepG2 (μM) |
|------------------|--------------------------------|---------------------------------|-------------------------------|-------------------------------|--------------------------------|
| <b>1</b>         | 40.73 ± 0.42                   | 340.53 ± 6.72                   | 283.35 ± 5.72                 | 460.53 ± 10.58                | 332.76 ± 12.43                 |
| <b>2</b>         | 91.64 ± 3.18                   | 361.26 ± 9.81                   | 301.15 ± 14.93                | 464.75 ± 13.47                | 369.49 ± 7.78                  |
| <b>3</b>         | 90.48 ± 2.41                   | > 500                           | 203.87 ± 16.32                | > 500                         | > 500                          |
| <b>4</b>         | 100.74 ± 9.71                  | 269.76 ± 12.53                  | 398.54 ± 9.47                 | 401.26 ± 16.51                | 365.68 ± 12.45                 |
| <b>5</b>         | > 500                          | > 500                           | > 500                         | > 500                         | > 500                          |
| <b>6</b>         | 147.13 ± 16.26                 | 243.56 ± 19.34                  | 167.57 ± 12.09                | 387.46 ± 13.64                | 247.13 ± 17.43                 |
| <b>7</b>         | 101.70 ± 10.01                 | 211.57 ± 16.06                  | 234.64 ± 9.01                 | 306.87 ± 17.24                | 224.89 ± 21.03                 |
| <b>8</b>         | 229.34 ± 21.96                 | 245.54 ± 20.43                  | 356.87 ± 16.58                | 324.34 ± 13.48                | 327.46 ± 9.73                  |
| <b>9</b>         | 249.08 ± 27.08                 | 443.35 ± 23.36                  | > 500                         | > 500                         | 389.38 ± 17.74                 |
| <b>10</b>        | 113.59 ± 6.16                  | 387.34 ± 16.53                  | 412.76 ± 21.11                | 415.78 ± 26.86                | 315.35 ± 16.34                 |
| <b>11</b>        | 117.03 ± 11.89                 | 315.30 ± 21.89                  | 213.56 ± 10.90                | 315.53 ± 13.46                | 317.06 ± 21.69                 |
| <b>12</b>        | 401.01 ± 23.33                 | > 500                           | > 500                         | > 500                         | > 500                          |
| <b>13</b>        | 160.24 ± 20.04                 | 357.30 ± 26.67                  | 425.67 ± 13.46                | 409.35 ± 11.36                | 369.78 ± 22.24                 |
| <b>14</b>        | 249.19 ± 29.26                 | >500                            | >500                          | >500                          | >500                           |
| <b>15</b>        | 297.03 ± 12.73                 | > 500                           | > 500                         | > 500                         | > 500                          |
| <b>16</b>        | 148.09 ± 11.16                 | 245.57 ± 16.24                  | 387.20 ± 16.86                | 341.35 ± 14.74                | 457.30 ± 26.47                 |
| <b>17</b>        | 173.83 ± 21.94                 | 357.30 ± 26.67                  | > 500                         | > 500                         | > 500                          |
| <b>18</b>        | 158.03 ± 13.68                 | 335.46 ± 12.35                  | 457.34 ± 8.48                 | 379.36 ± 26.12                | 414.08 ± 22.45                 |
| <b>19</b>        | 92.01 ± 5.31                   | 289.47 ± 28.44                  | 397.34 ± 24.35                | 454.35 ± 21.43                | 453.34 ± 25.76                 |
| <b>20</b>        | 58.77 ± 0.40                   | 321.42 ± 12.57                  | 456.36 ± 22.39                | 457.00 ± 22.19                | 482.14 ± 8.24                  |
| <b>21</b>        | 148.63 ± 3.02                  | 387.64 ± 19.69                  | 387.08 ± 25.23                | 338.58 ± 23.53                | 455.35 ± 24.34                 |
| <b>22</b>        | 154.81 ± 25.05                 | >500                            | >500                          | >500                          | 335.36 ± 26.38                 |
| <b>23</b>        | 112.91 ± 10.99                 | 456.40 ± 26.10                  | 389.57 ± 23.41                | >500                          | 358.30 ± 27.60                 |
| <b>Cisplatin</b> | 9.86 ± 0.13                    | 19.32 ± 2.43                    | 6.24 ± 1.54                   | 10.20 ± 0.69                  | 11.34 ± 2.25                   |



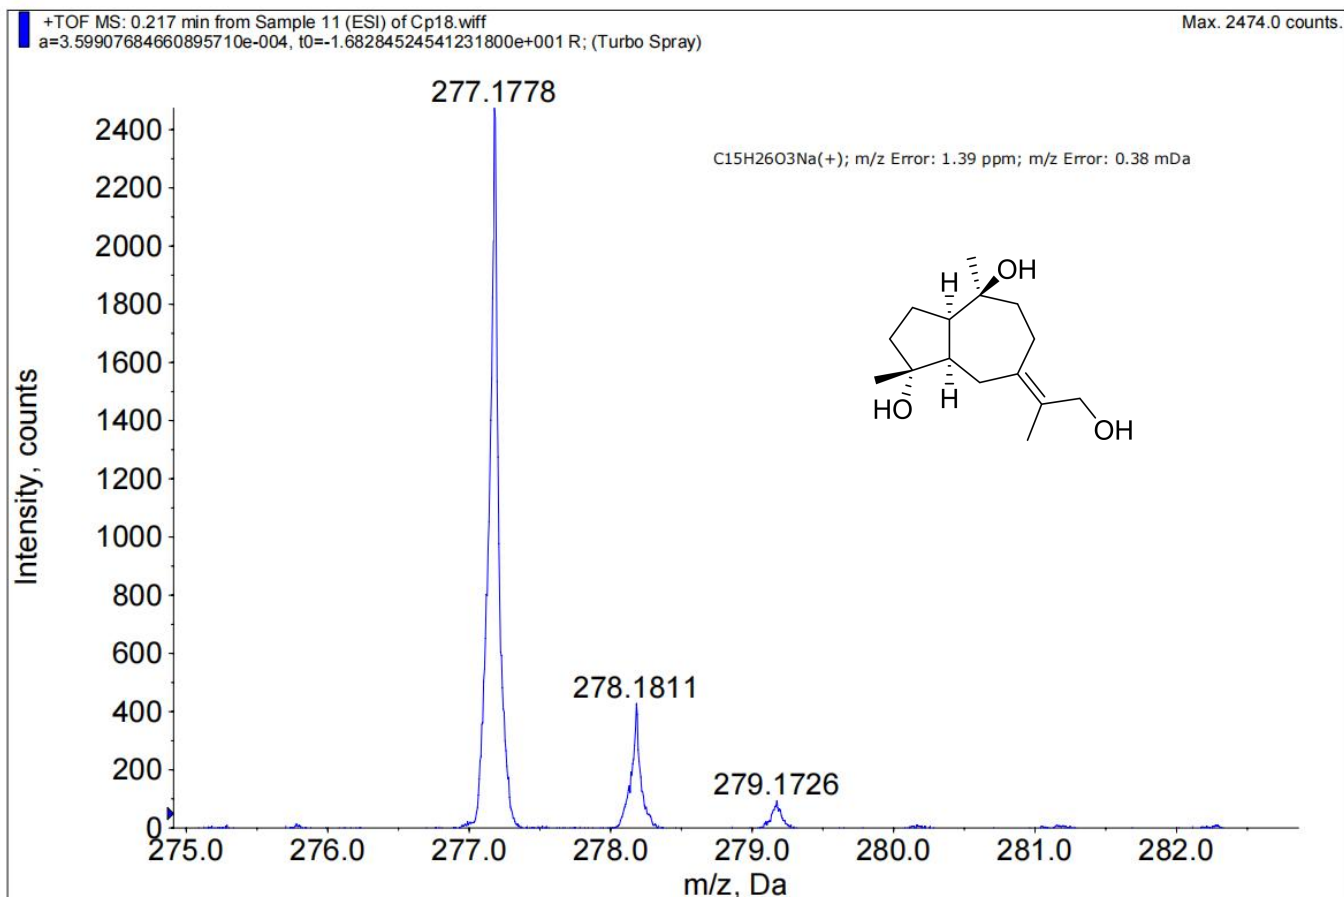

**Figure S4. The HR-ESI-MS Spectrum of Compound 1**

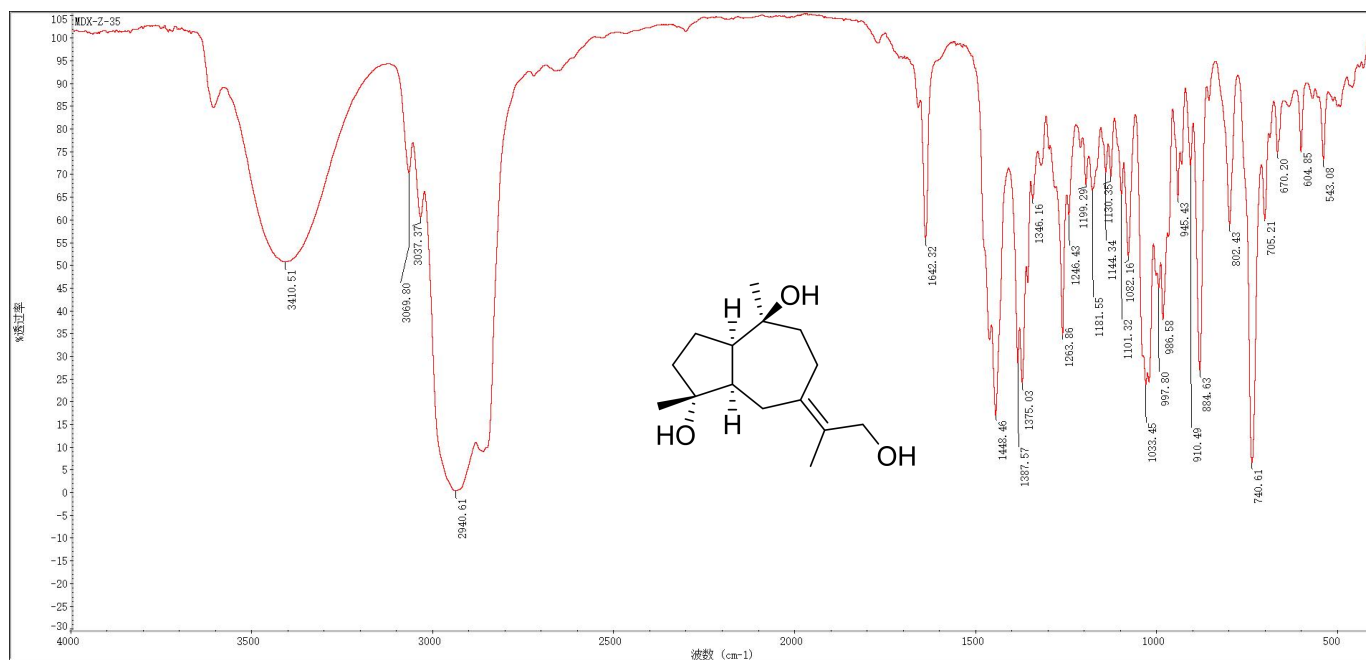

**Figure S5. The IR Spectrum of Compound 1**

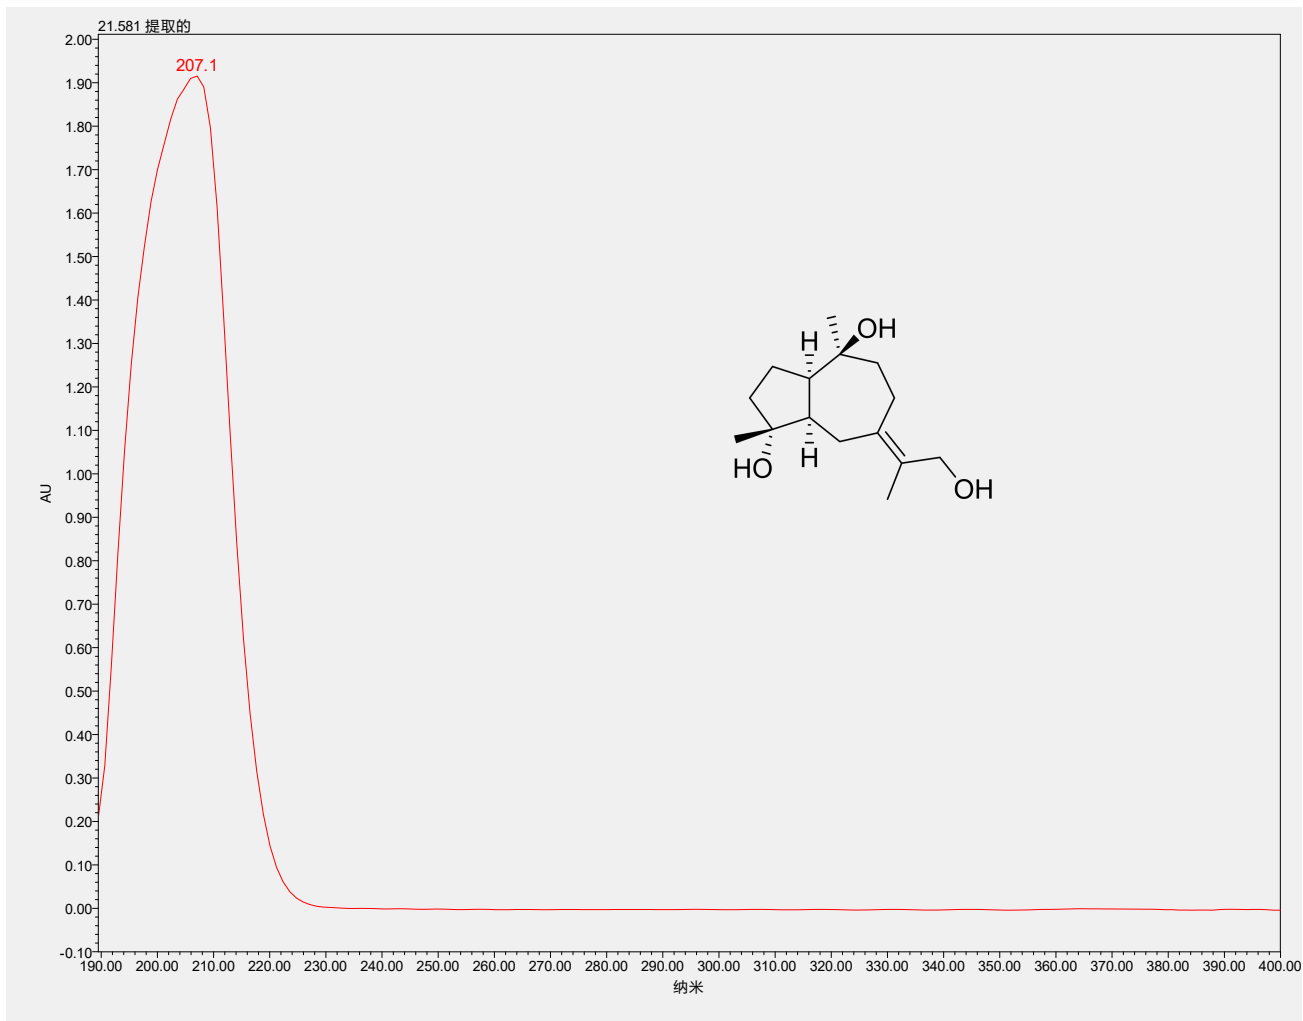

Figure S6. The UV Spectrum of Compound 1

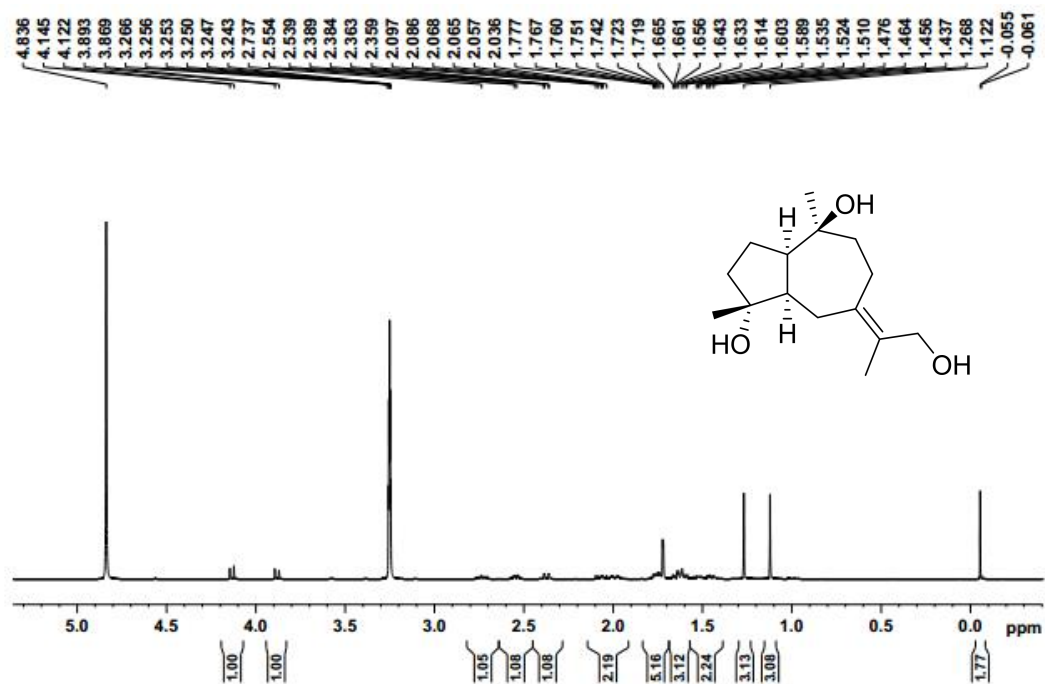

Figure S7. The <sup>1</sup>H NMR Spectrum of Compound 1 in CD<sub>3</sub>OD

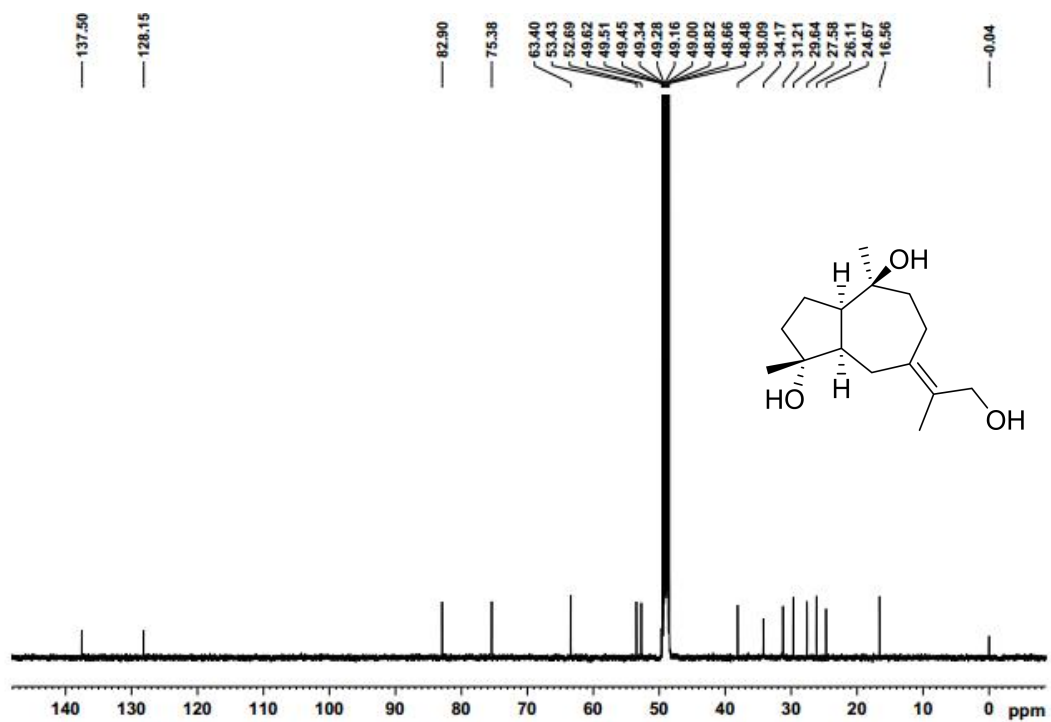

Figure S8. The  $^{13}\text{C}$  NMR Spectrum of Compound 1 in  $\text{CD}_3\text{OD}$

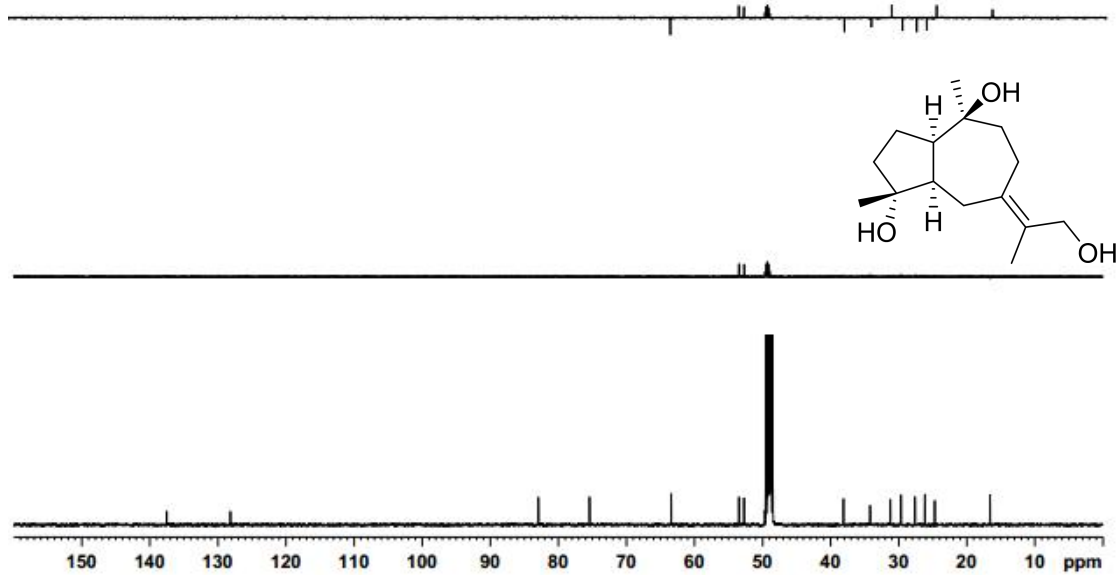

Figure S9. The DEPT Spectrum of Compound 1 in  $\text{CD}_3\text{OD}$



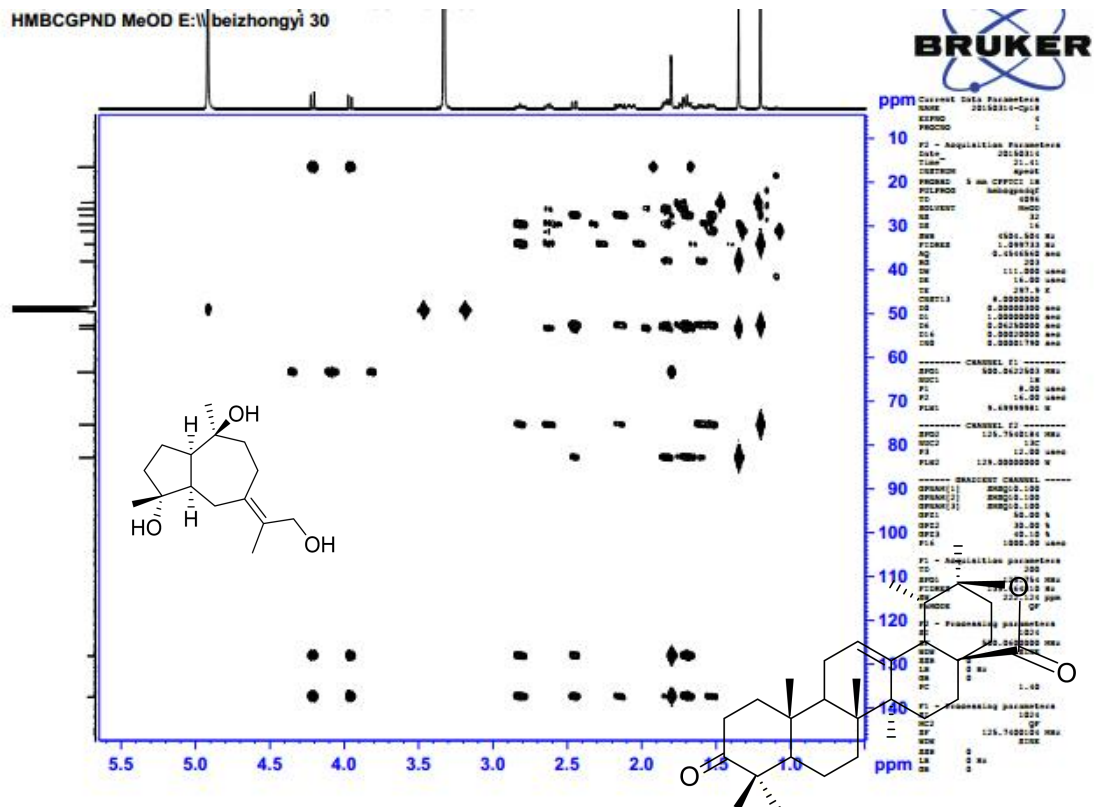

Figure S12. The HMBC Spectrum of Compound 1 in CD3OD

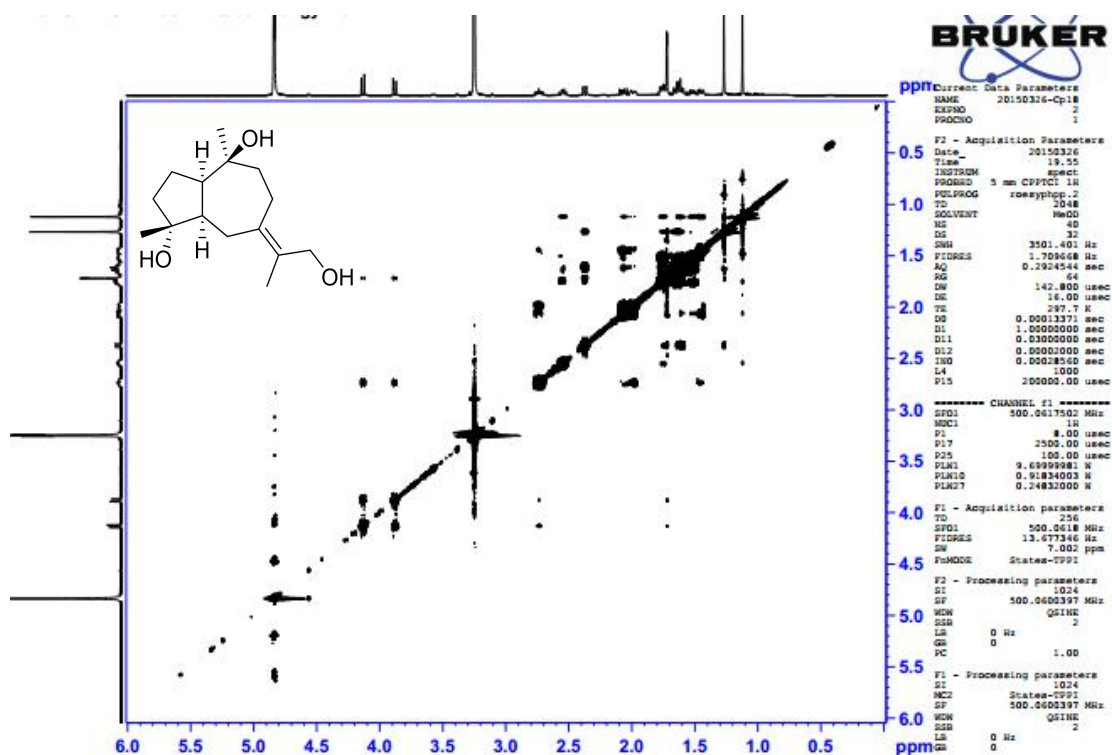

Figure S13. The NOESY Spectrum of Compound 1 in CD3OD

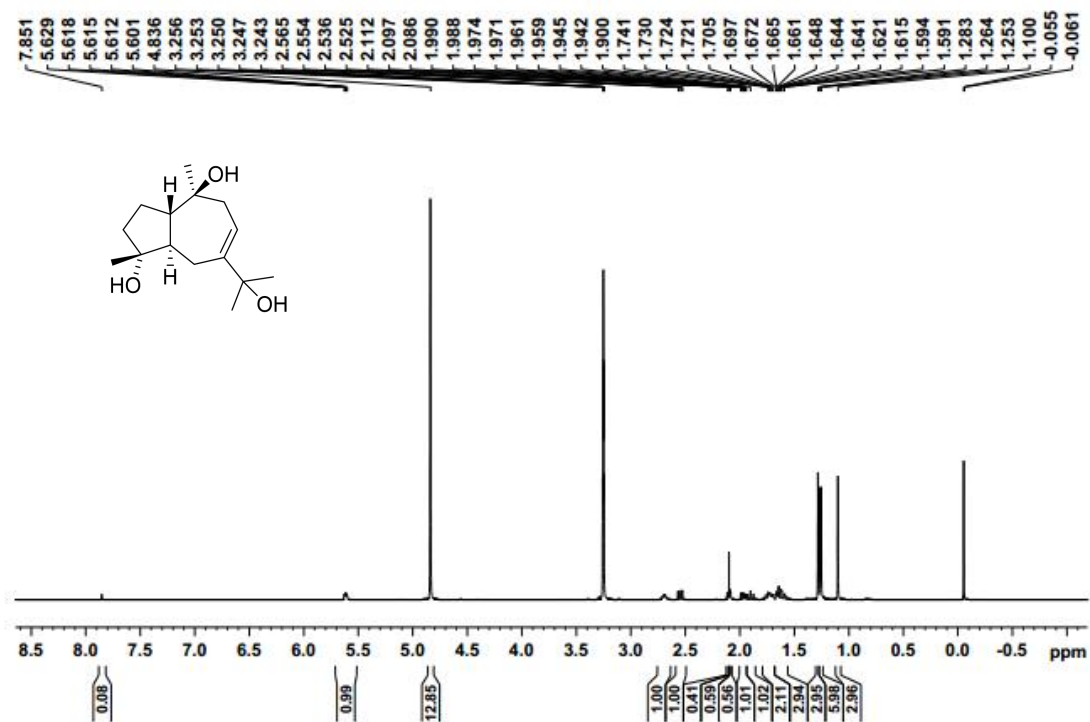

Figure S14. The <sup>1</sup>H NMR Spectrum of Compound 2 in CD<sub>3</sub>OD

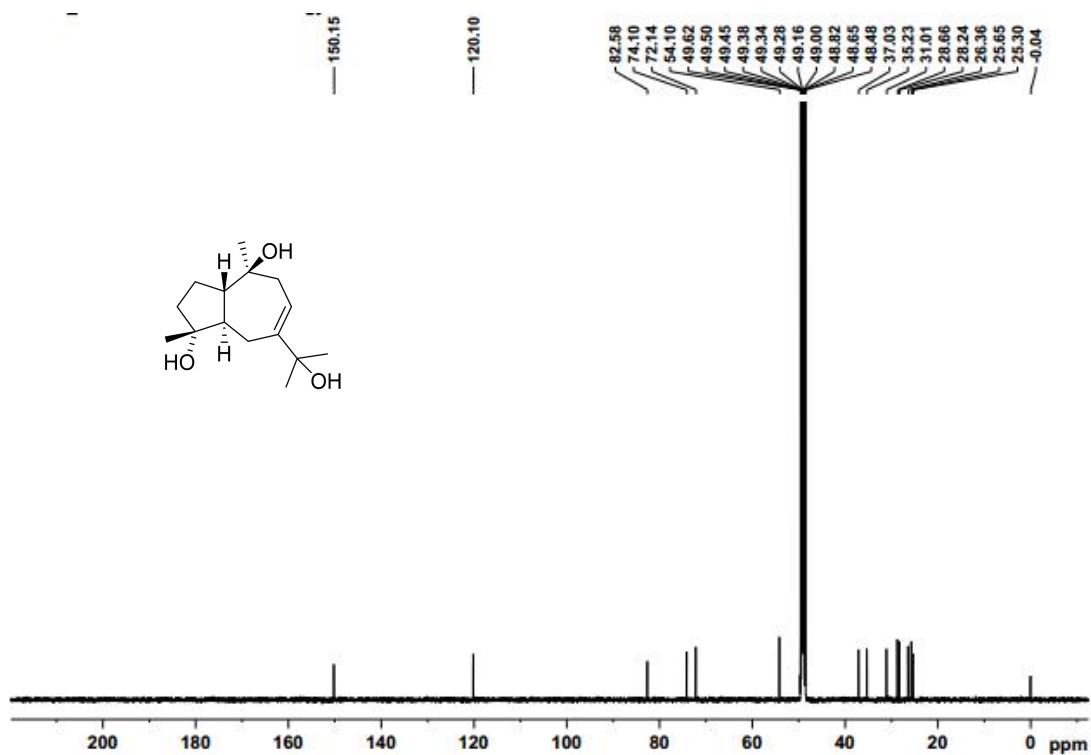

Figure S15. The <sup>13</sup>C NMR Spectrum of Compound 2 in CD<sub>3</sub>OD



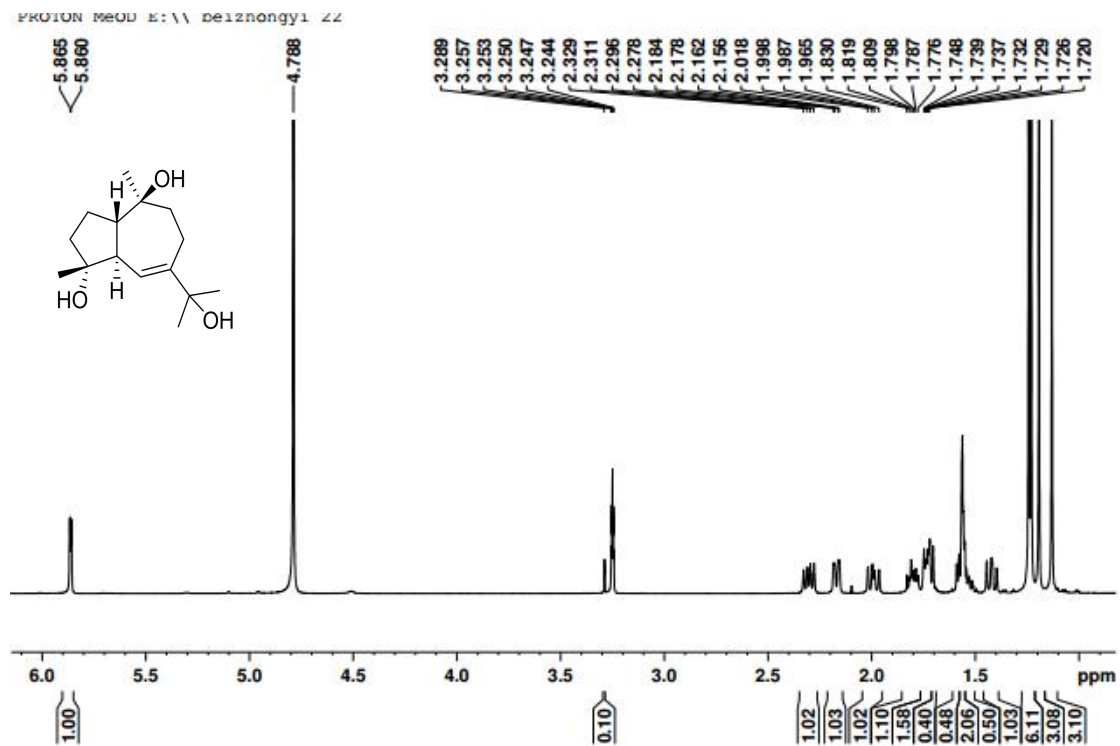

Figure S16. The  $^1\text{H}$  NMR Spectrum of Compound 3 in  $\text{CD}_3\text{OD}$

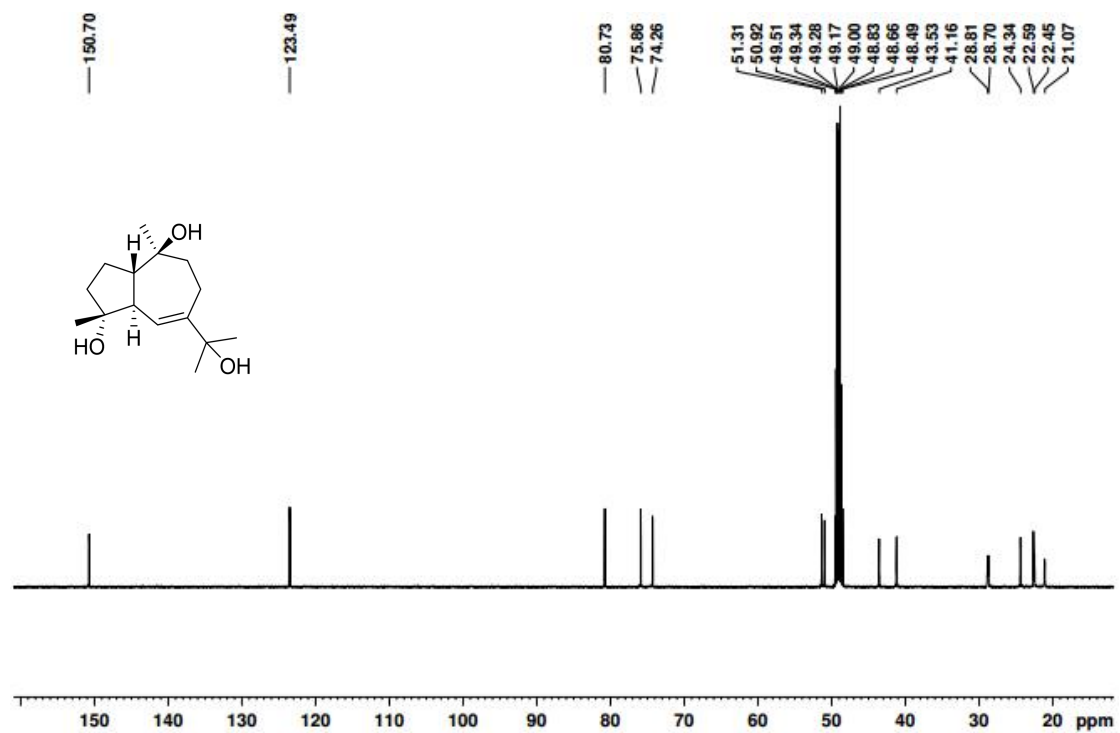

Figure S17. The  $^{13}\text{C}$  NMR Spectrum of Compound 3 in  $\text{CD}_3\text{OD}$

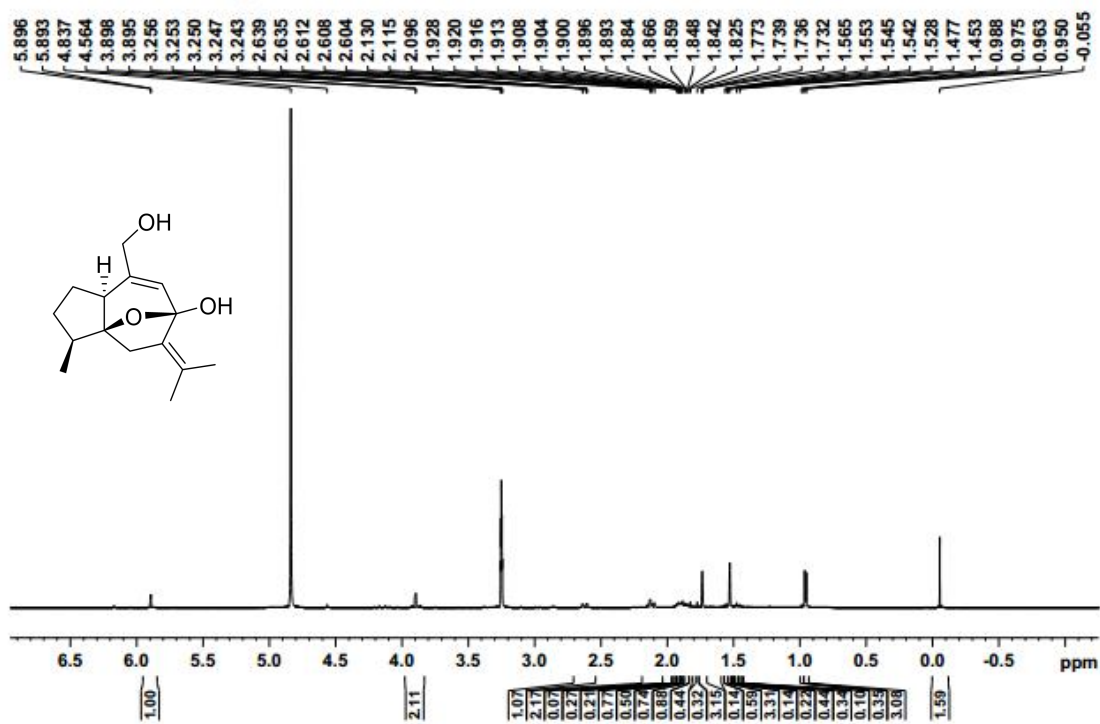

Figure S18. The <sup>1</sup>H NMR Spectrum of Compound 4 in CD<sub>3</sub>OD

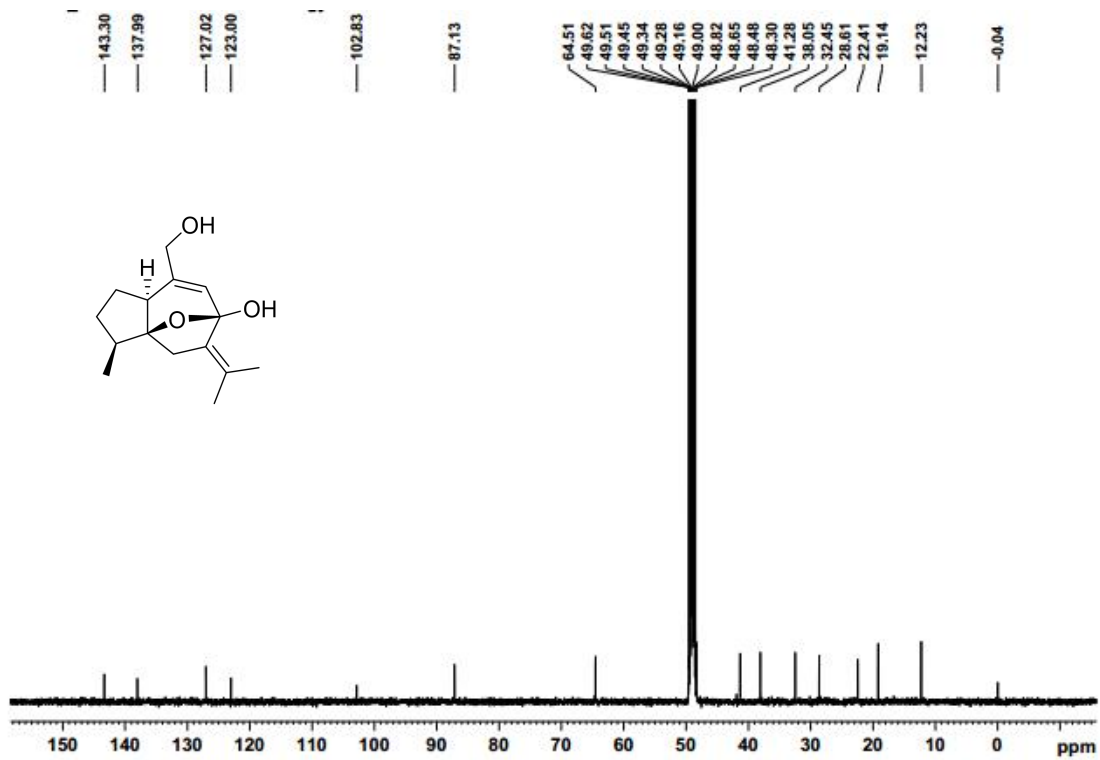

Figure S19. The <sup>13</sup>C NMR Spectrum of Compound 4 in CD<sub>3</sub>OD



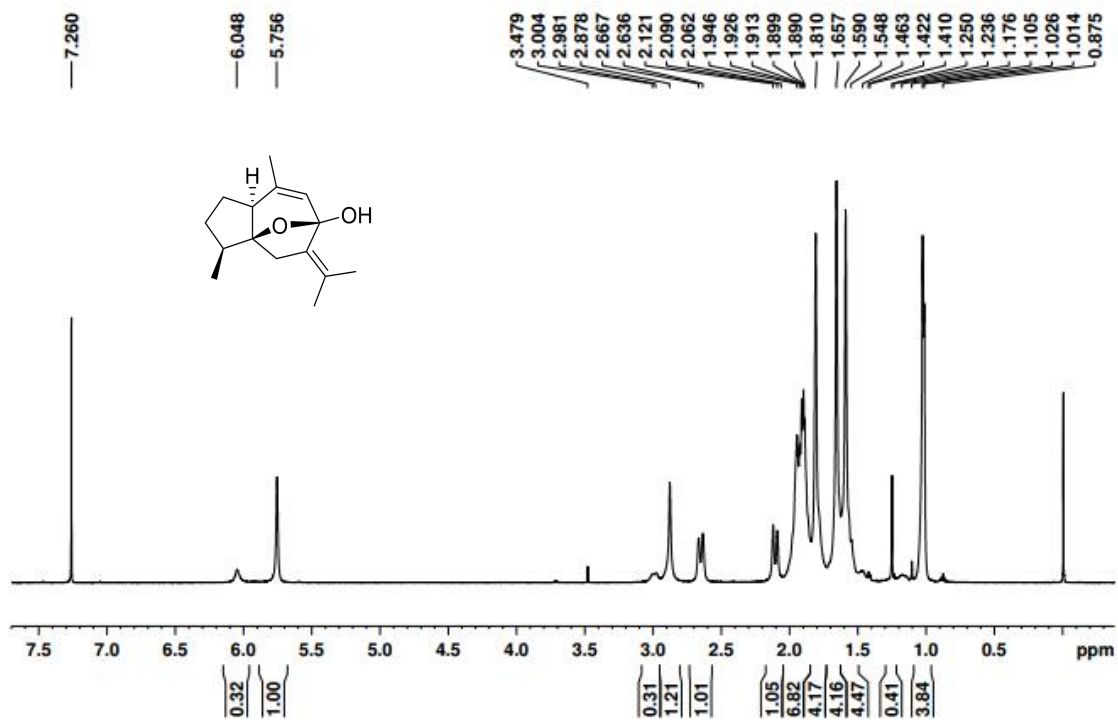

Figure S20. The <sup>1</sup>H NMR Spectrum of Compound 5 in CDCl<sub>3</sub>

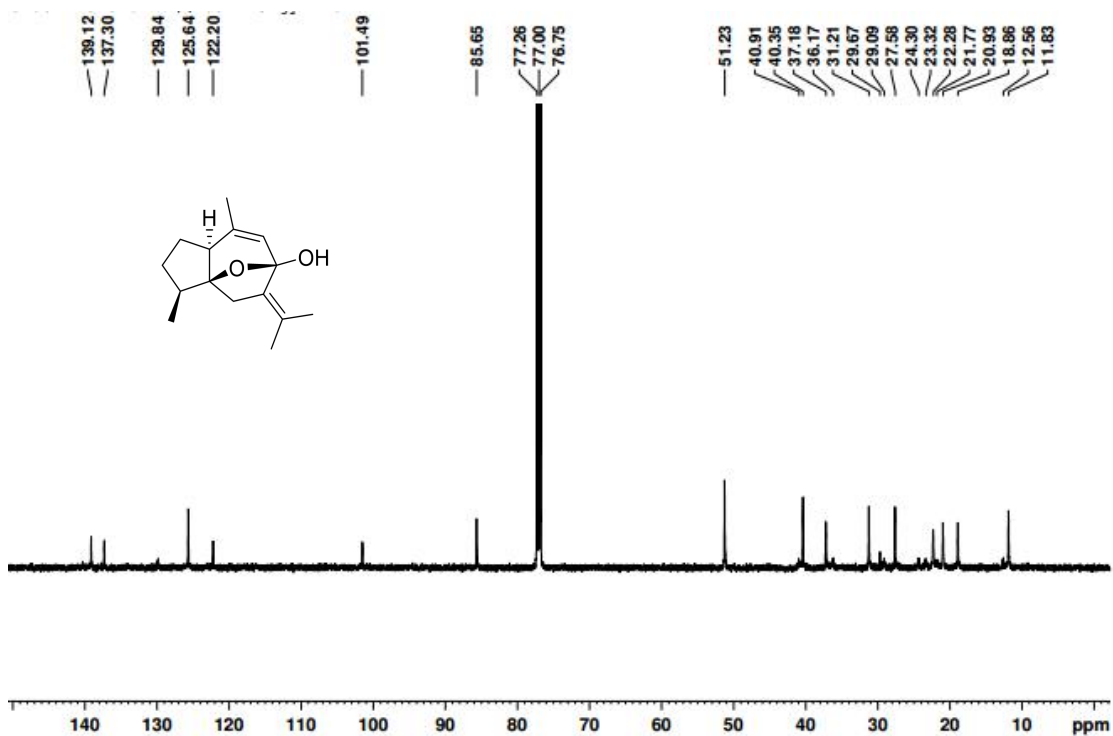

Figure S21. The <sup>13</sup>C NMR Spectrum of Compound 5 in CDCl<sub>3</sub>



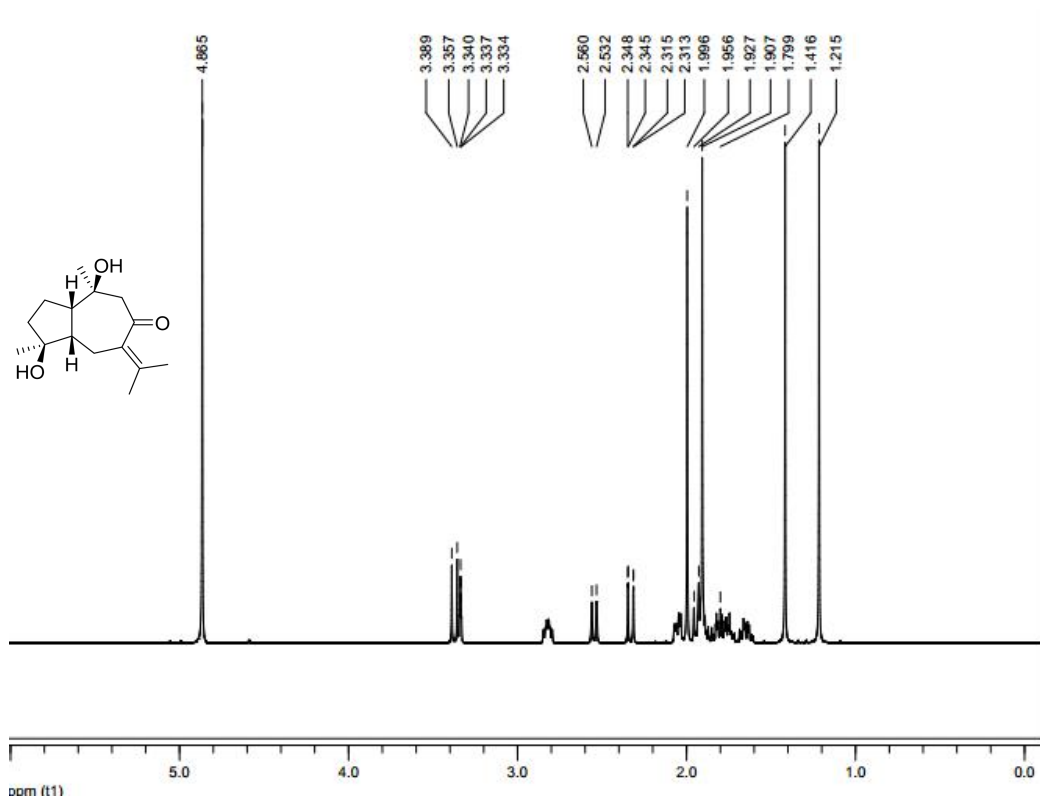

Figure S24. The <sup>1</sup>H NMR Spectrum of Compound 7 in CD<sub>3</sub>OD

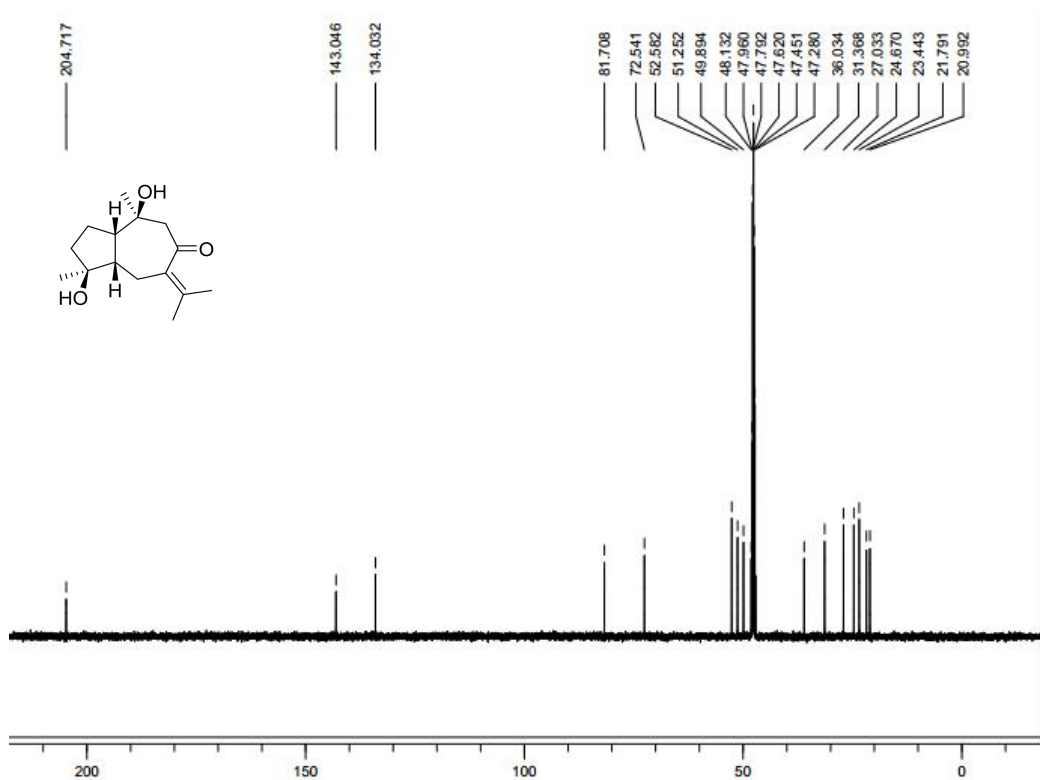

Figure S25. The <sup>13</sup>C NMR Spectrum of Compound 7 in CD<sub>3</sub>OD

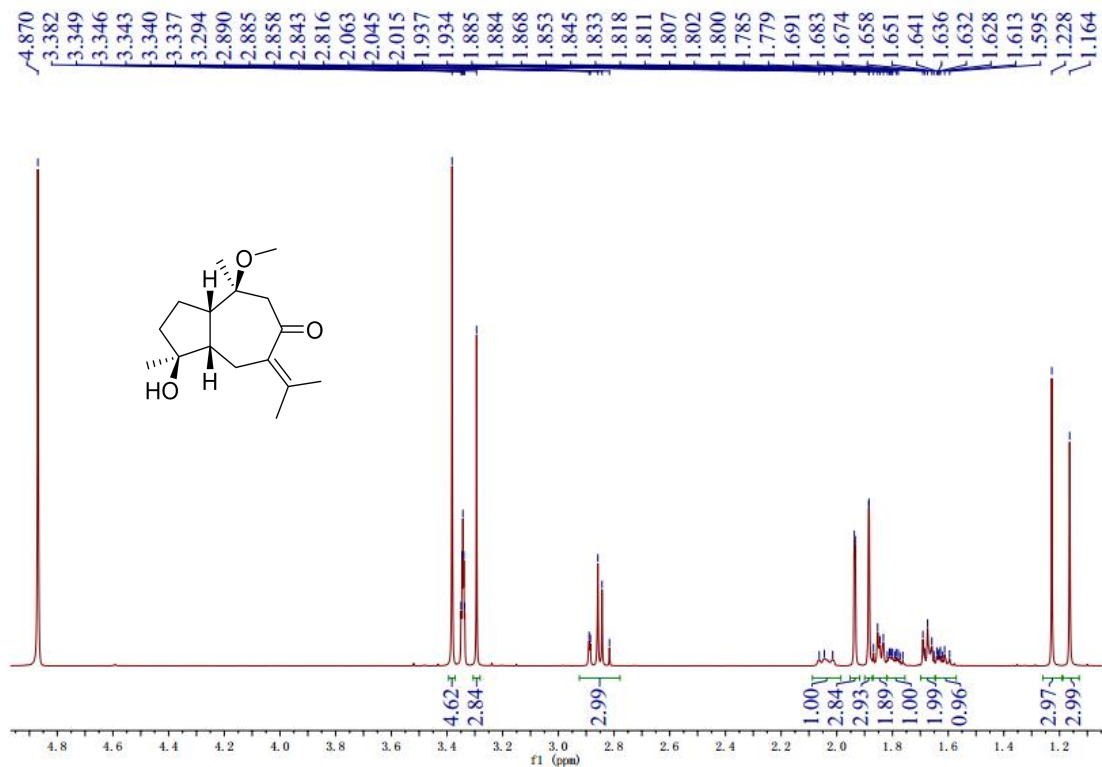

Figure S26. The <sup>1</sup>H NMR Spectrum of Compound 8 in CD<sub>3</sub>OD

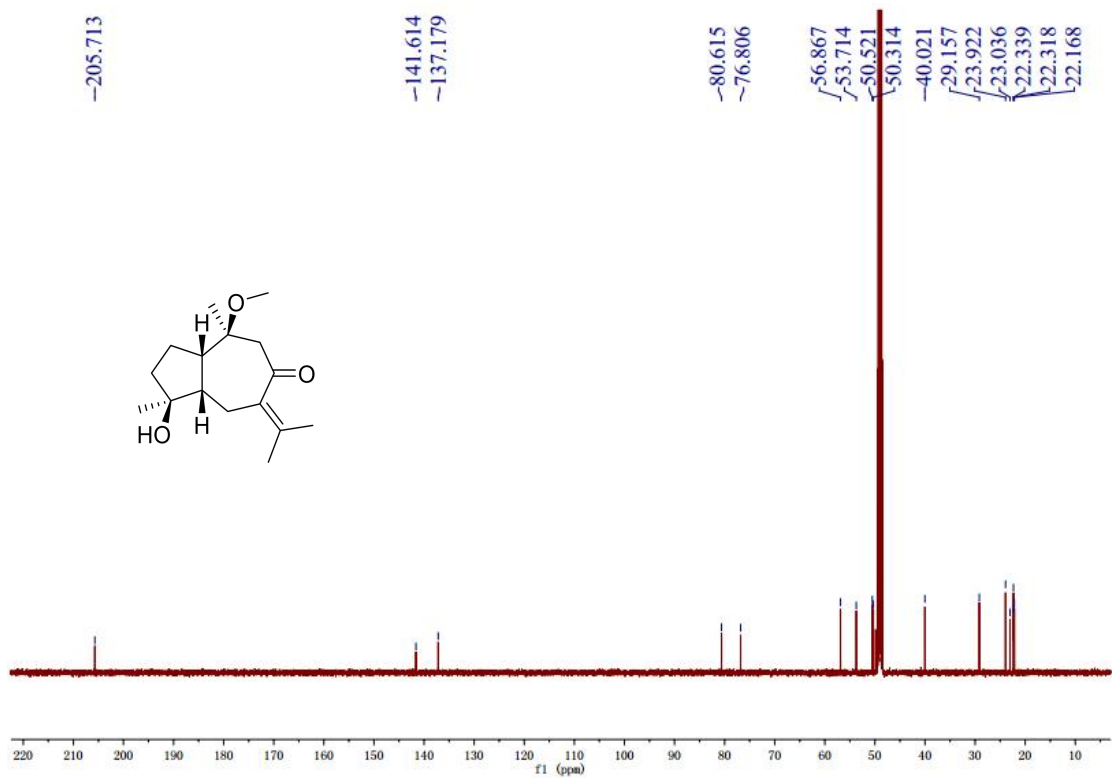

Figure S27. The <sup>13</sup>C NMR Spectrum of Compound 8 in CD<sub>3</sub>OD

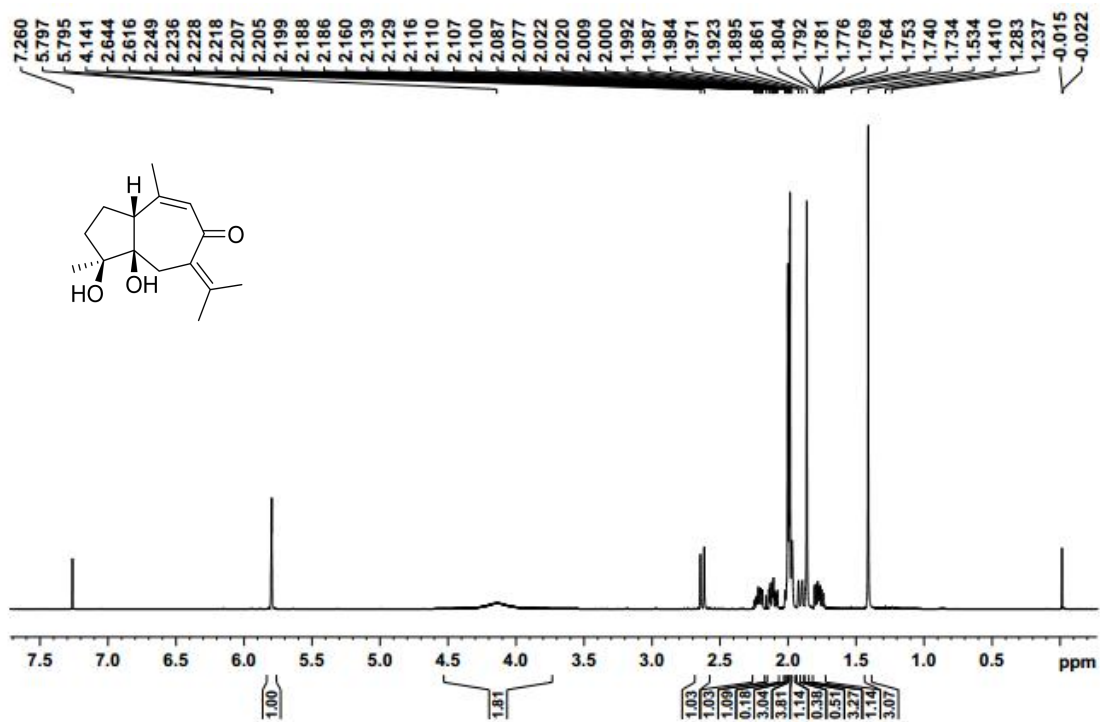

Figure S28. The <sup>1</sup>H NMR Spectrum of Compound 9 in CDCl<sub>3</sub>

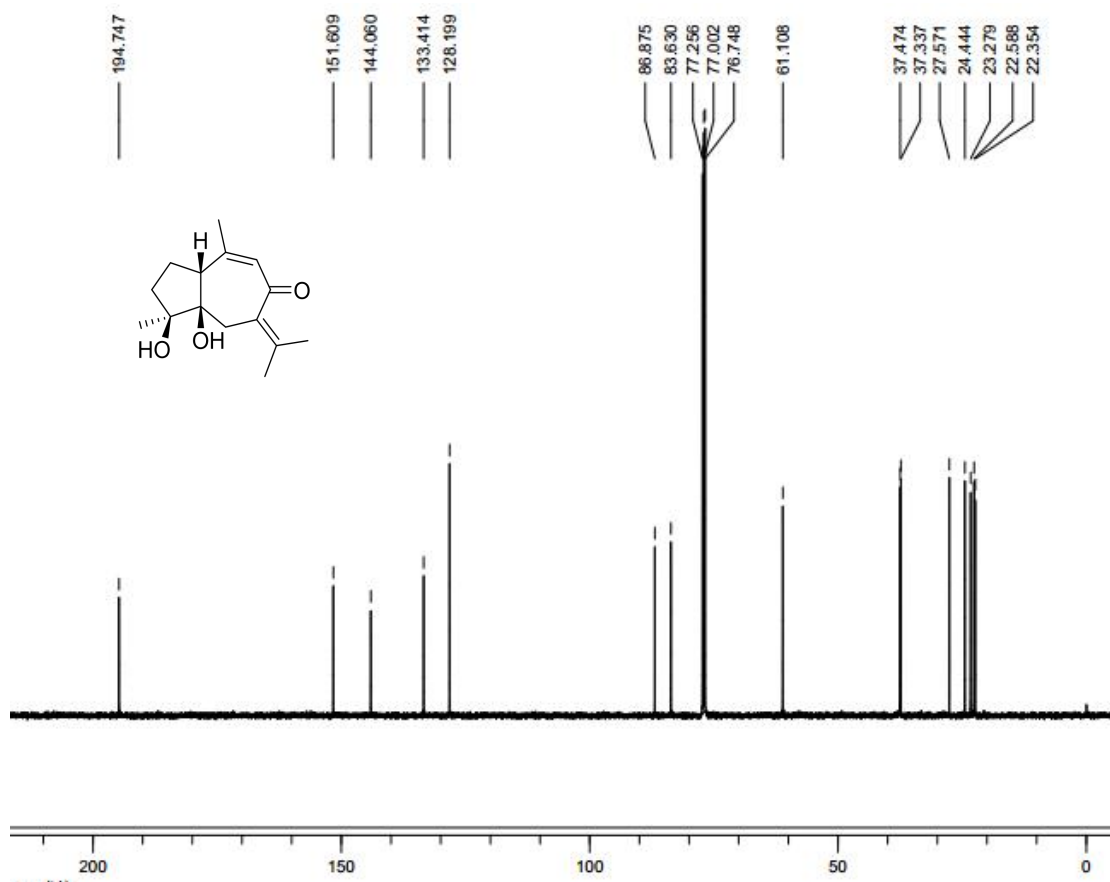

Figure S29. The <sup>13</sup>C NMR Spectrum of Compound 9 in CDCl<sub>3</sub>

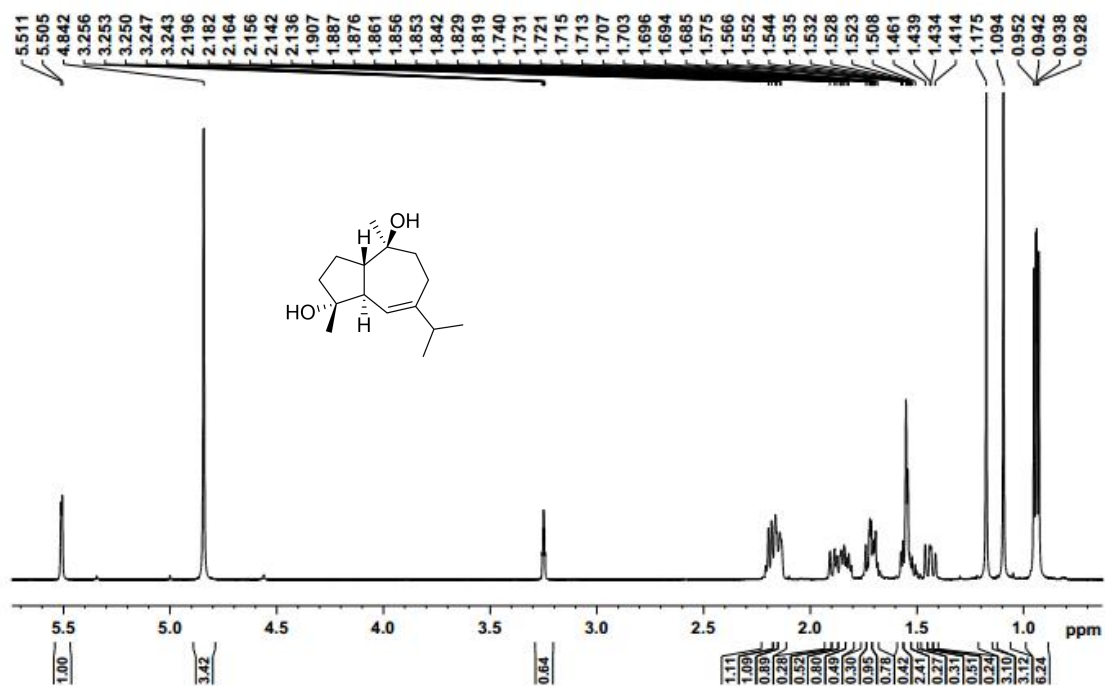

Figure S30. The  $^1\text{H}$  NMR Spectrum of Compound 10 in  $\text{CD}_3\text{OD}$

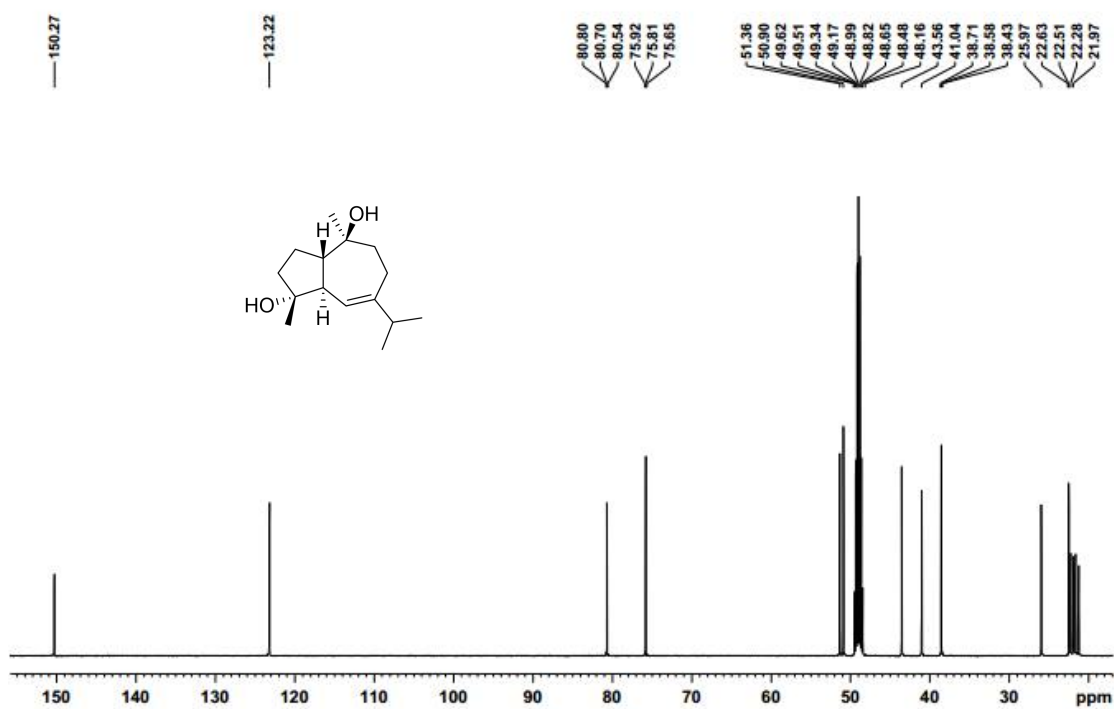

Figure S31. The  $^{13}\text{C}$  NMR Spectrum of Compound 10 in  $\text{CD}_3\text{OD}$

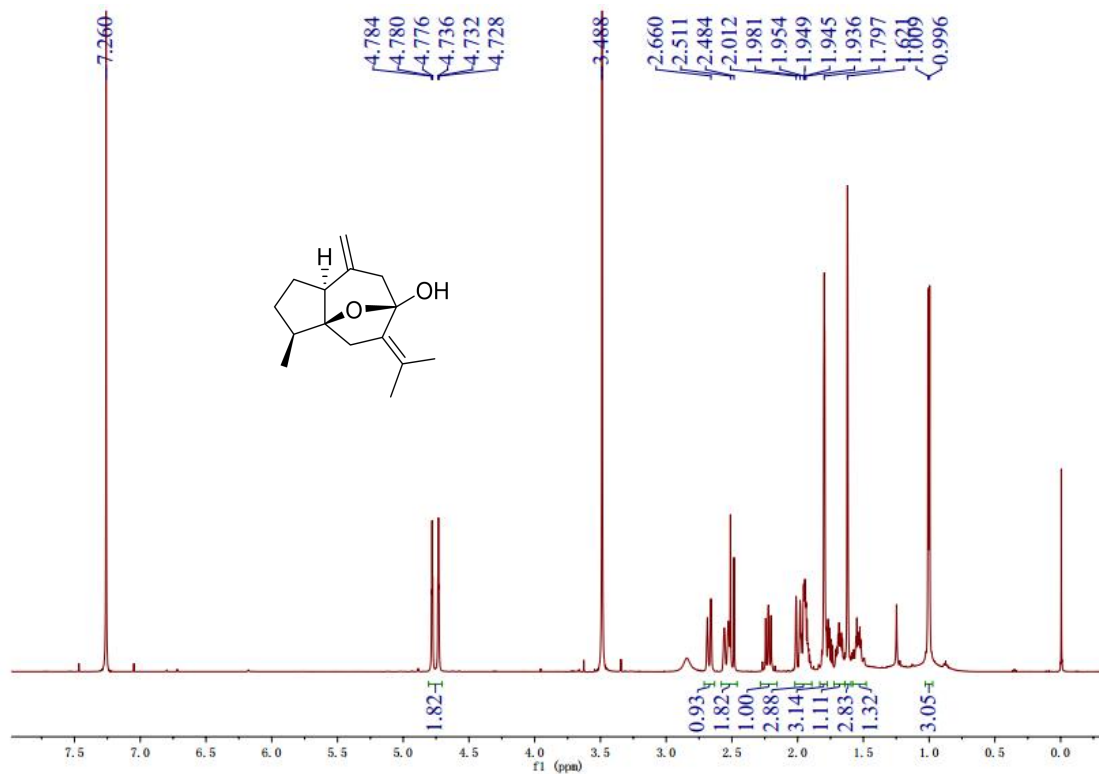

Figure S32. The  $^1\text{H}$  NMR Spectrum of Compound 11 in  $\text{CDCl}_3$

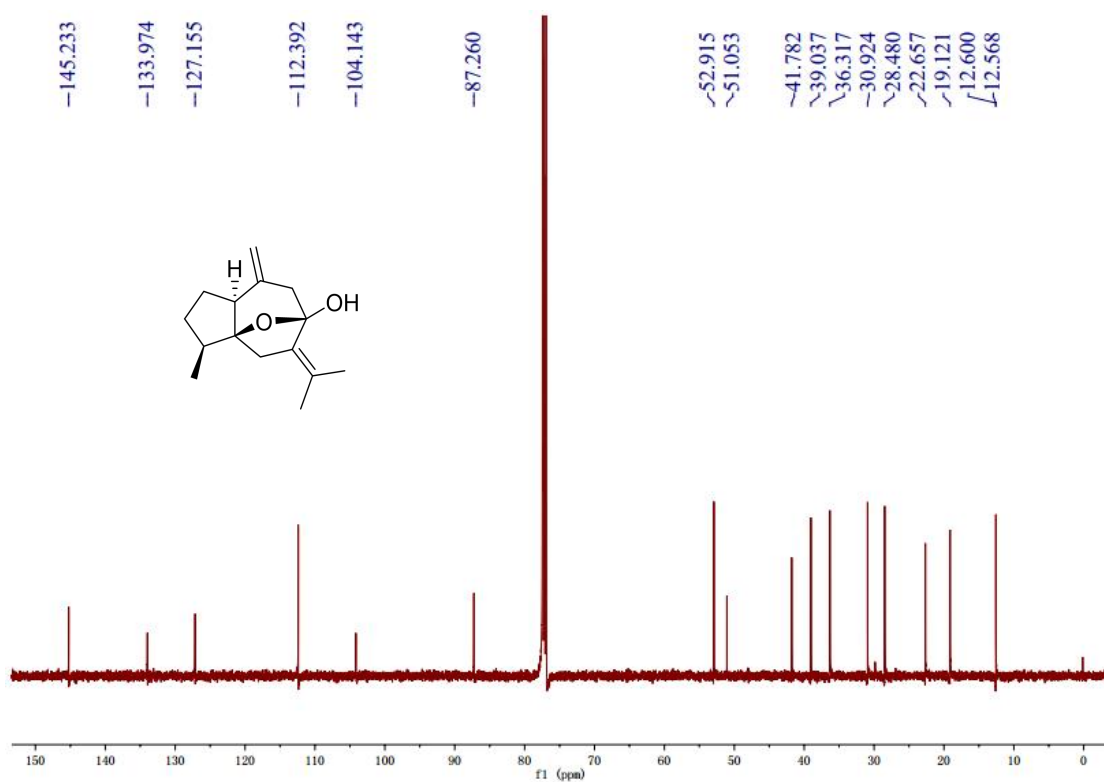

Figure S33. The  $^{13}\text{C}$  NMR Spectrum of Compound 11 in  $\text{CDCl}_3$

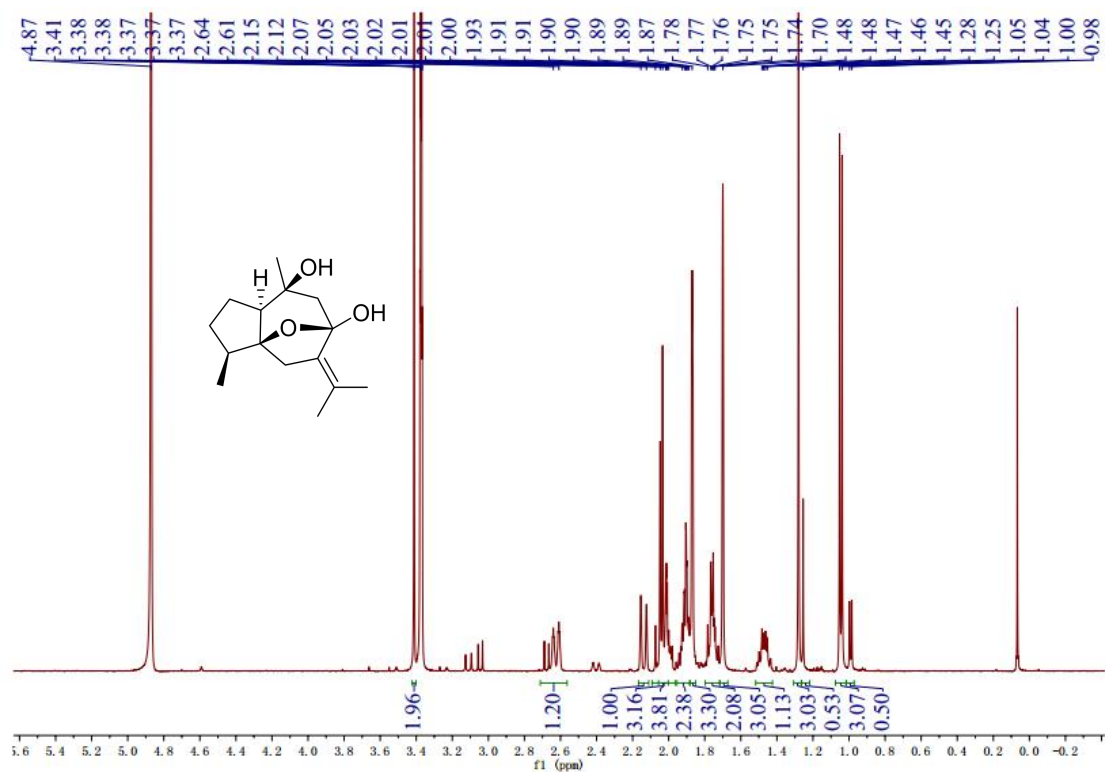

Figure S34. The  $^1\text{H}$  NMR Spectrum of Compound 12 in  $\text{CD}_3\text{OD}$

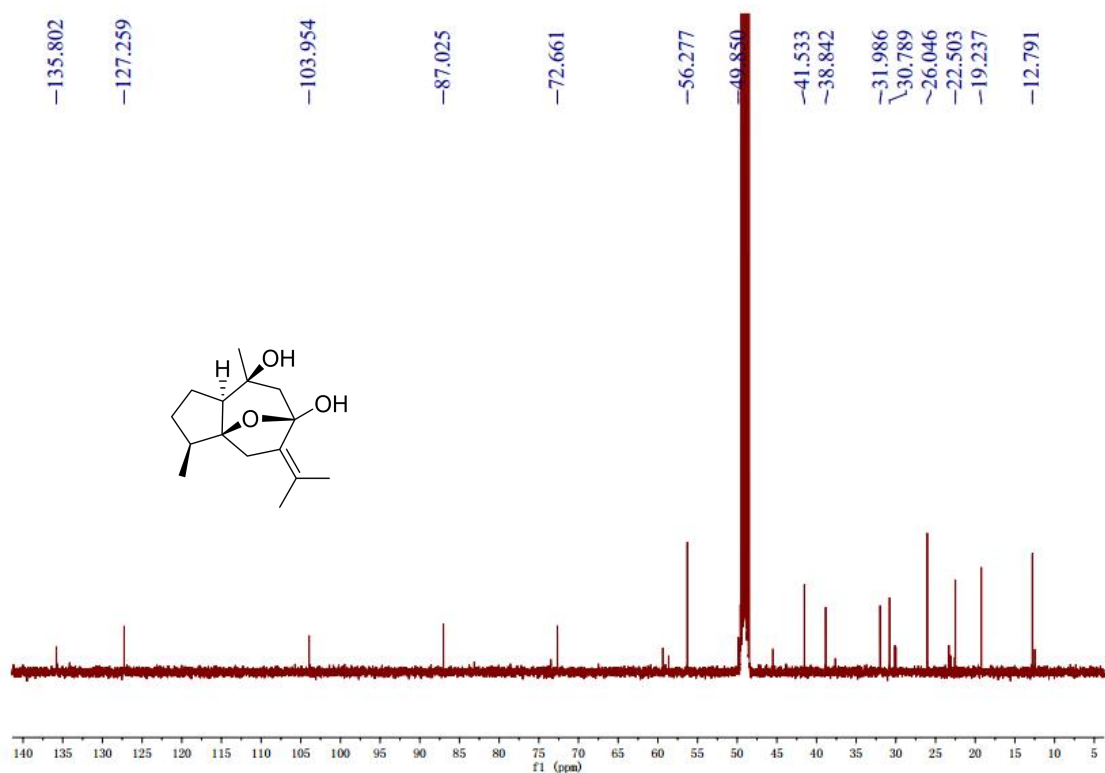

Figure S35. The  $^{13}\text{C}$  NMR Spectrum of Compound 12 in  $\text{CD}_3\text{OD}$



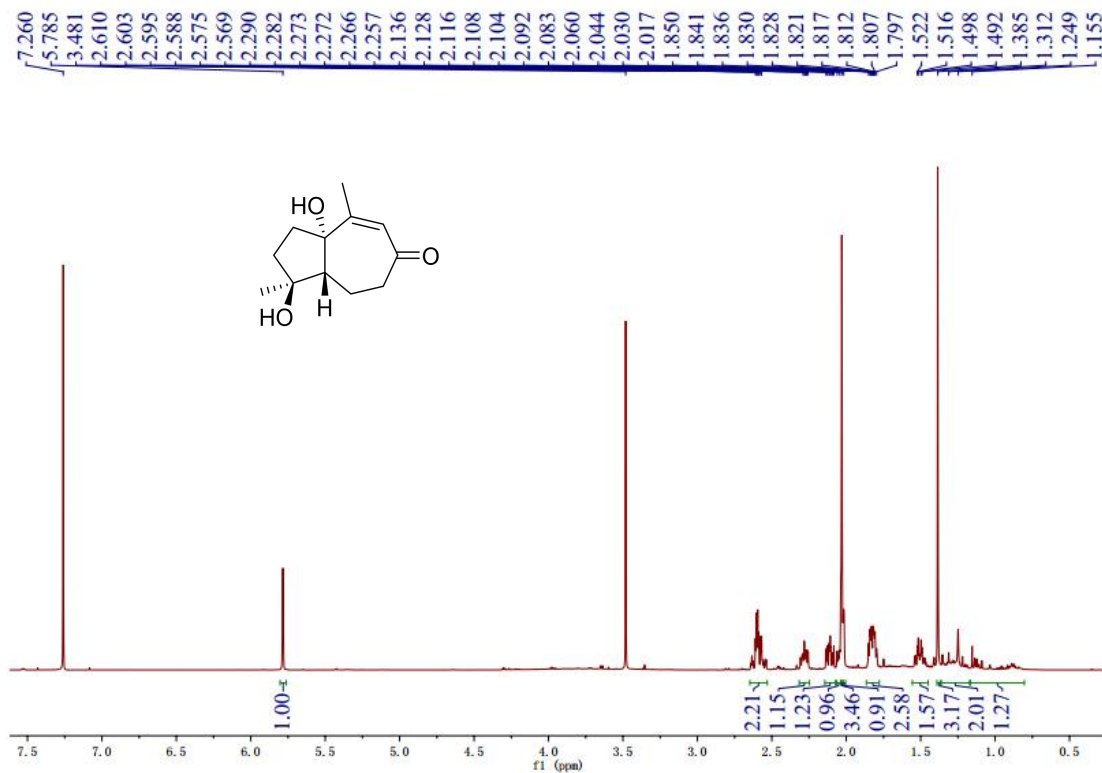

Figure S36. The  $^1\text{H}$  NMR Spectrum of Compound 13 in  $\text{CDCl}_3$

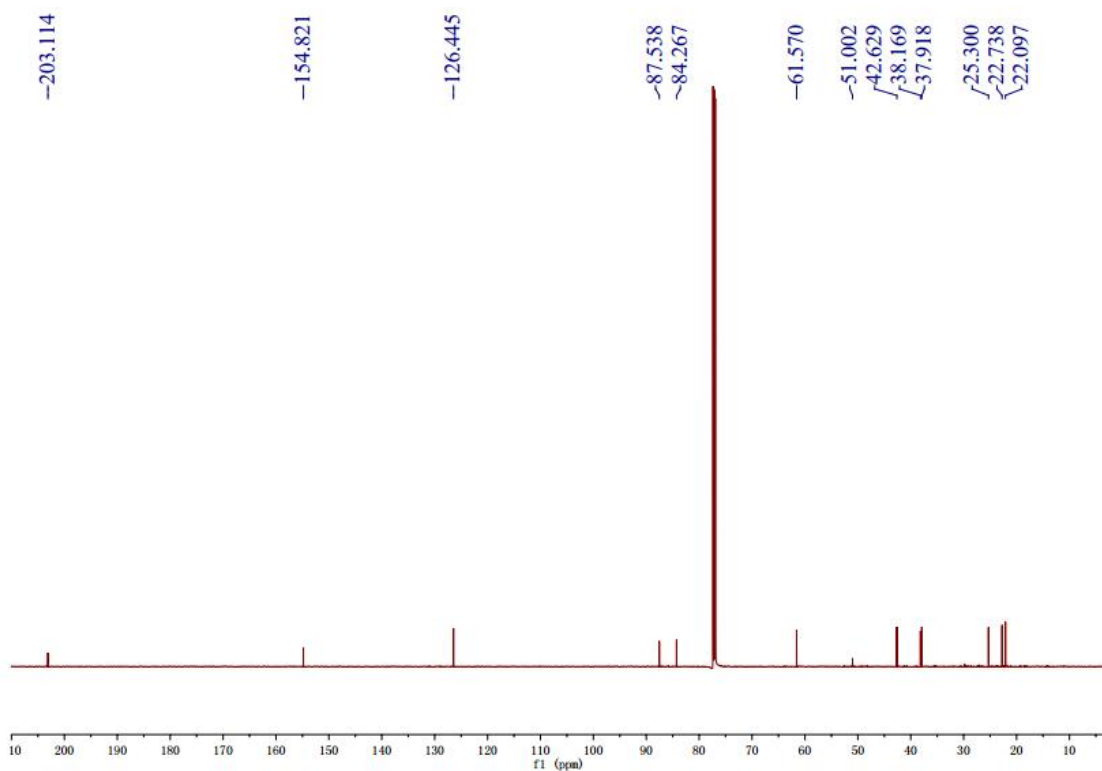

Figure S37. The  $^{13}\text{C}$  NMR Spectrum of Compound 13 in  $\text{CDCl}_3$

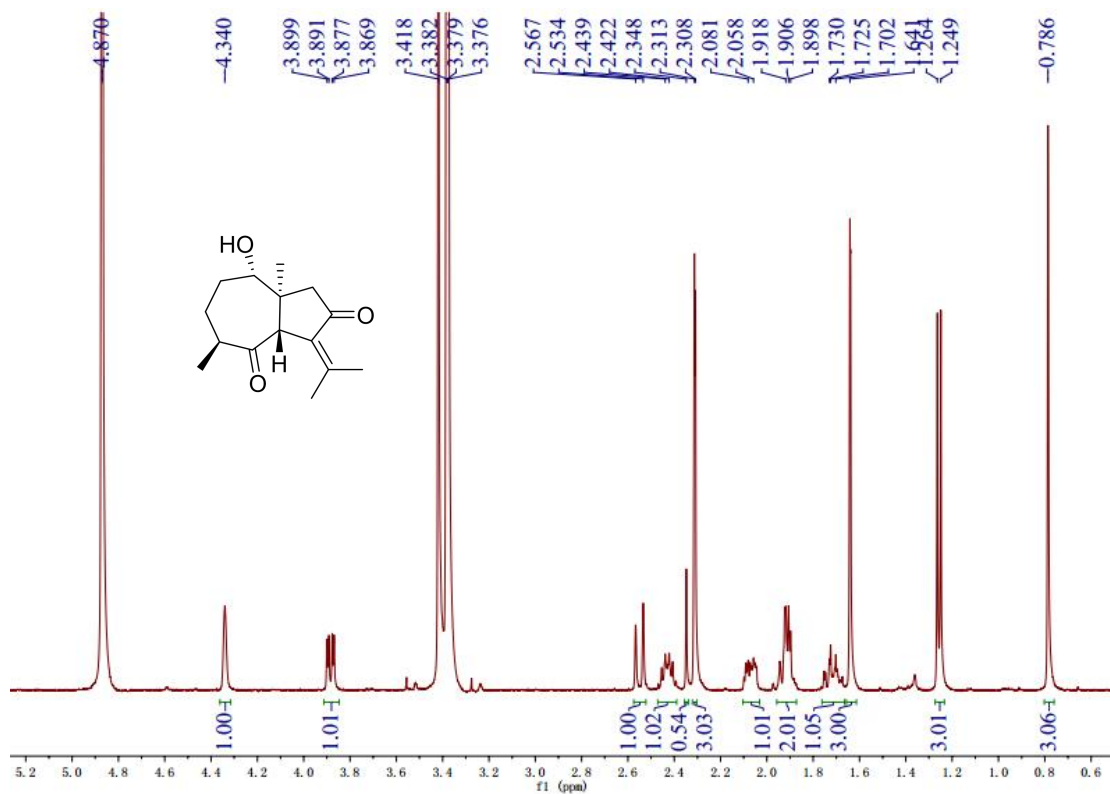

Figure S38. The  $^1\text{H}$  NMR Spectrum of Compound 14 in  $\text{CD}_3\text{OD}$

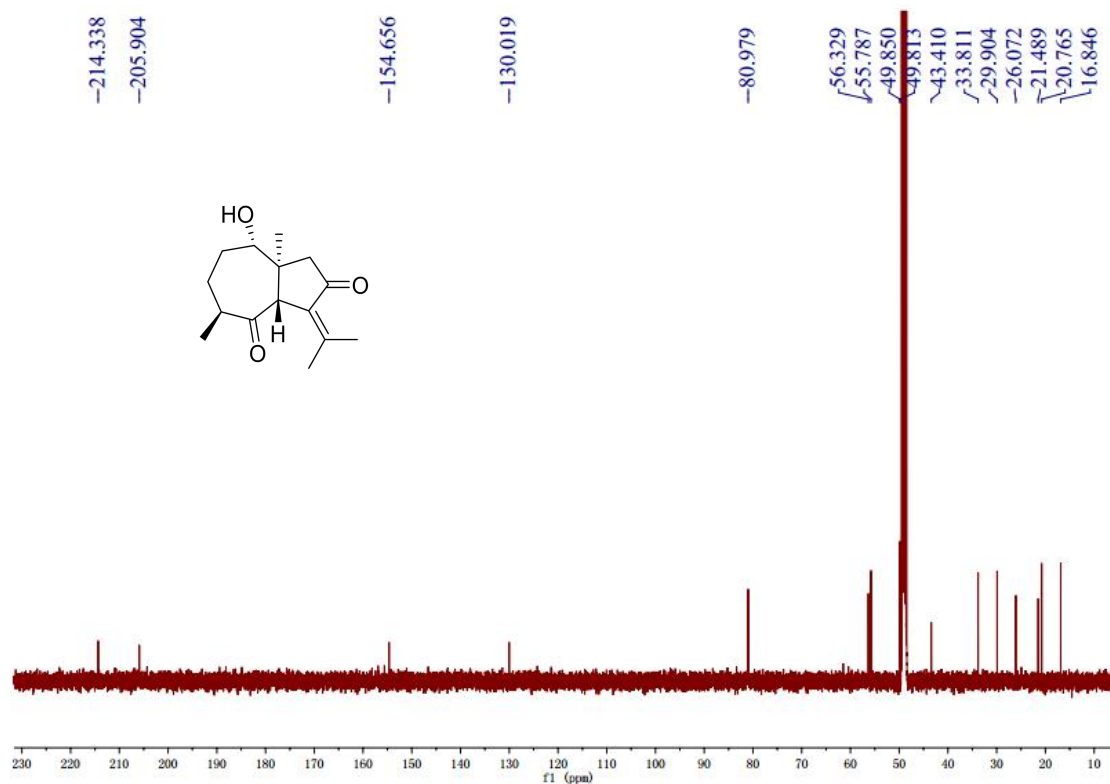

Figure S39. The  $^{13}\text{C}$  NMR Spectrum of Compound 14 in  $\text{CD}_3\text{OD}$

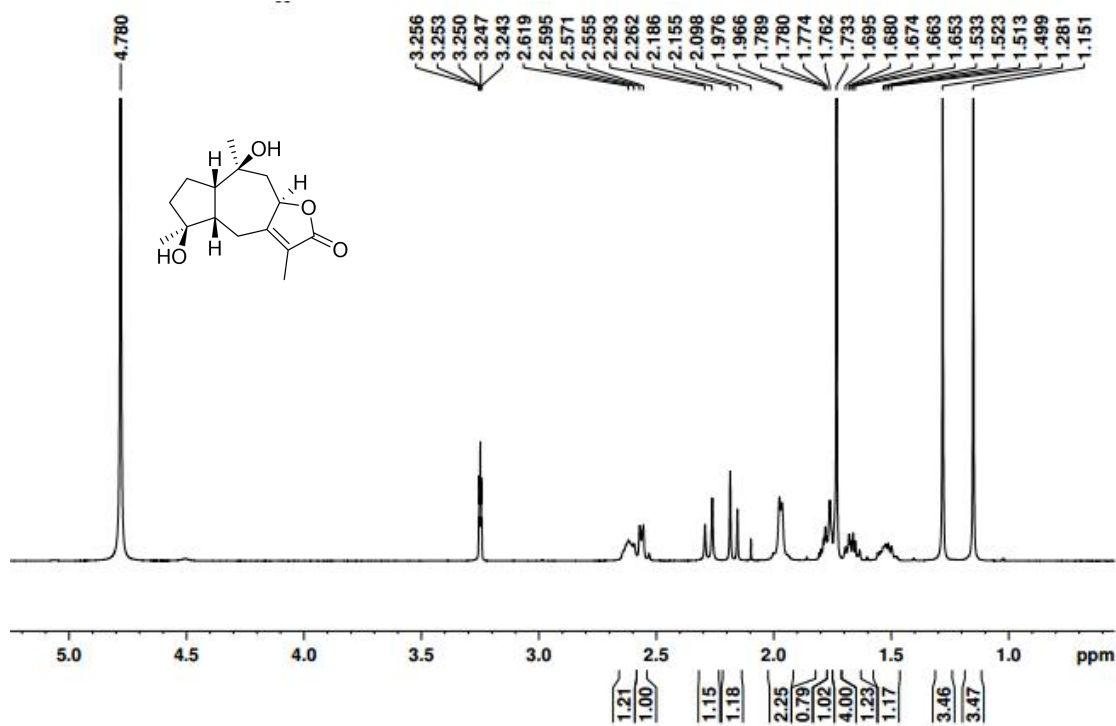

Figure S40. The  $^1\text{H}$  NMR Spectrum of Compound 15 in  $\text{CD}_3\text{OD}$

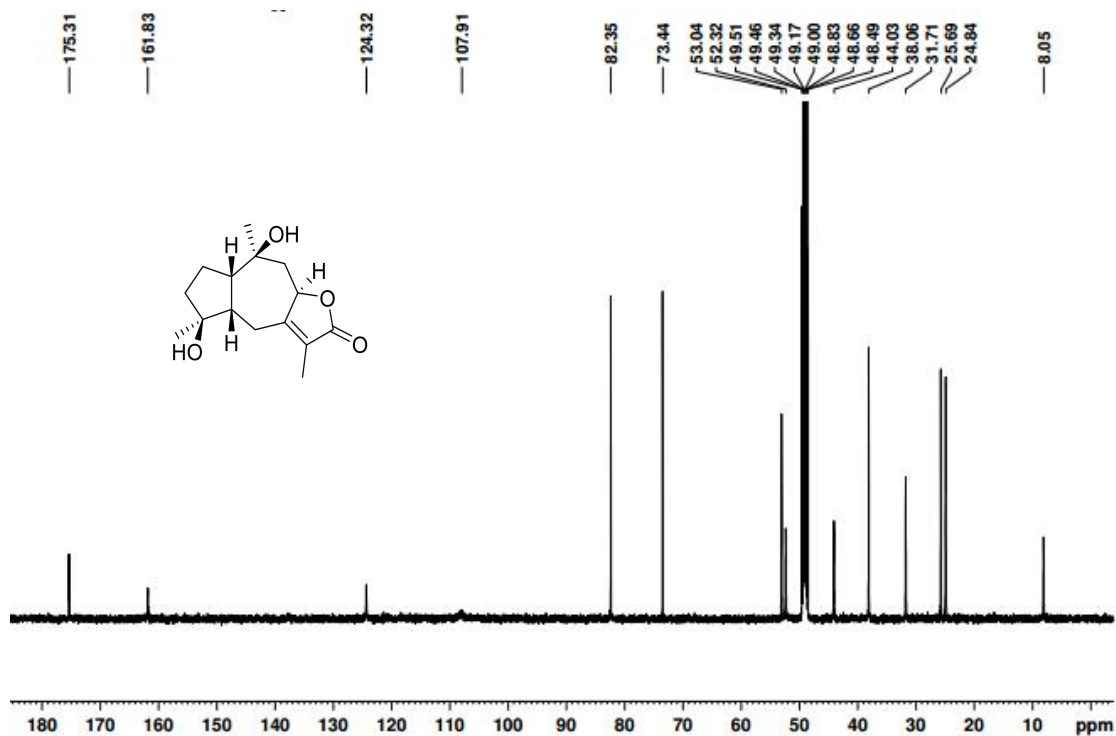

Figure S41. The  $^{13}\text{C}$  NMR Spectrum of Compound 15 in  $\text{CD}_3\text{OD}$

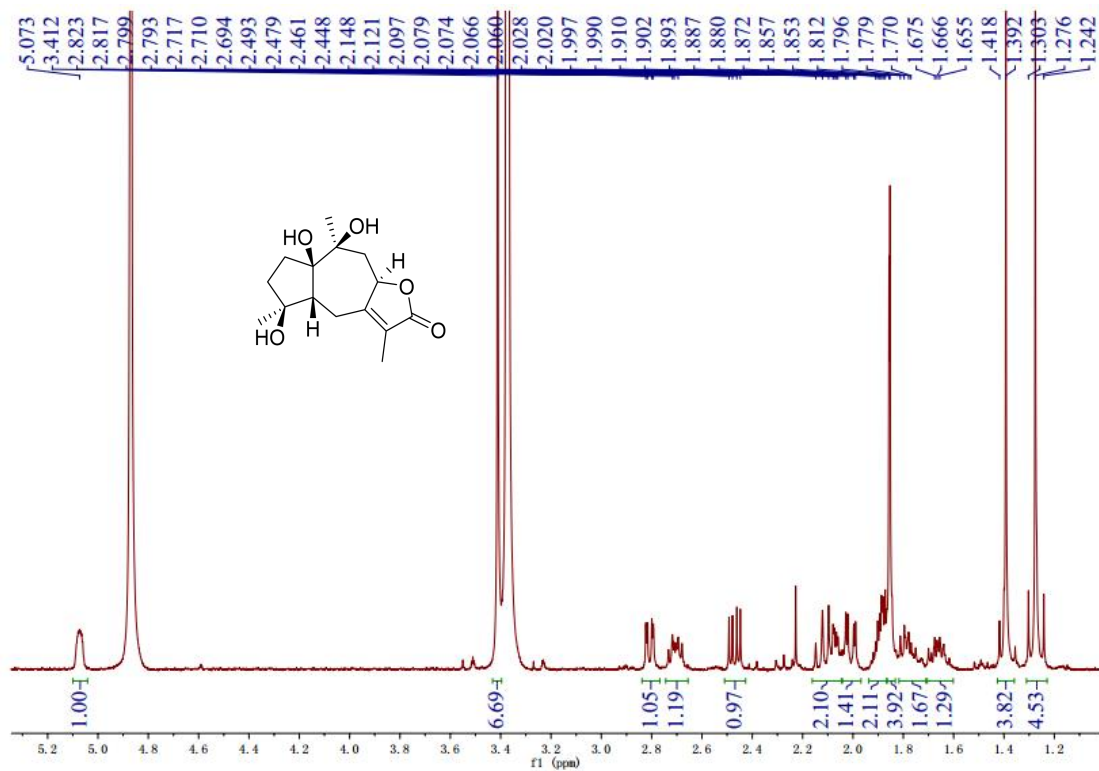

Figure S42. The  $^1\text{H}$  NMR Spectrum of Compound 16 in  $\text{CD}_3\text{OD}$

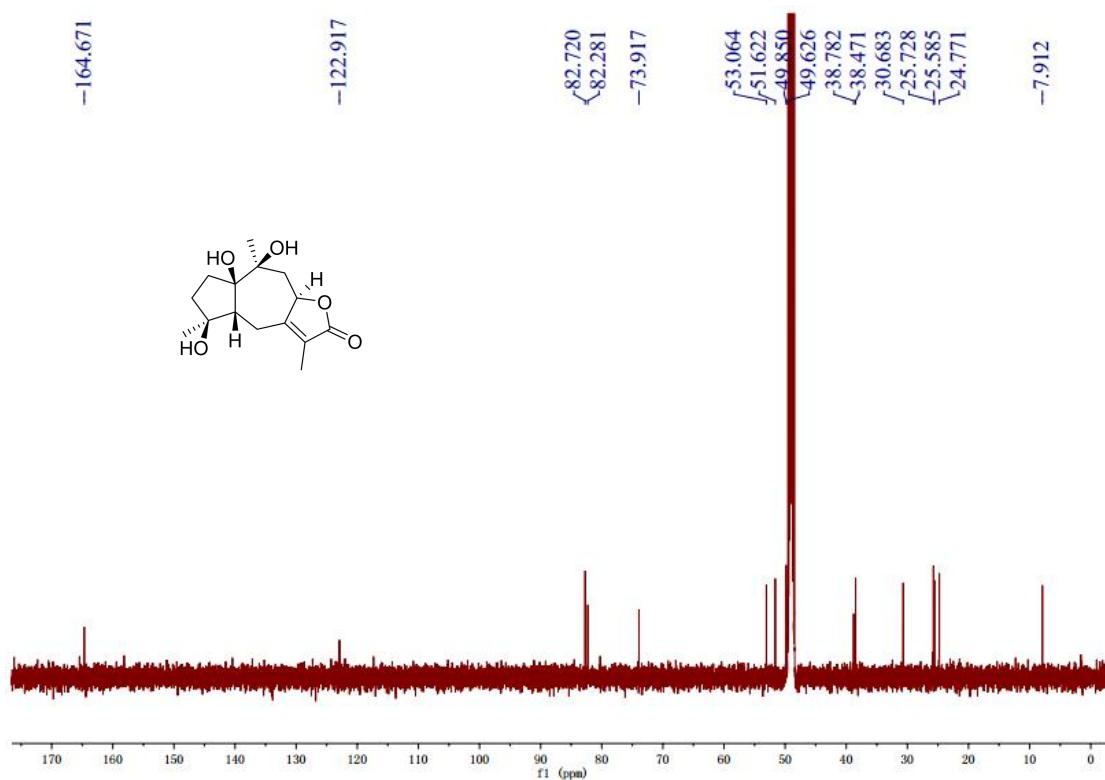

Figure S43. The  $^{13}\text{C}$  NMR Spectrum of Compound 16 in  $\text{CD}_3\text{OD}$

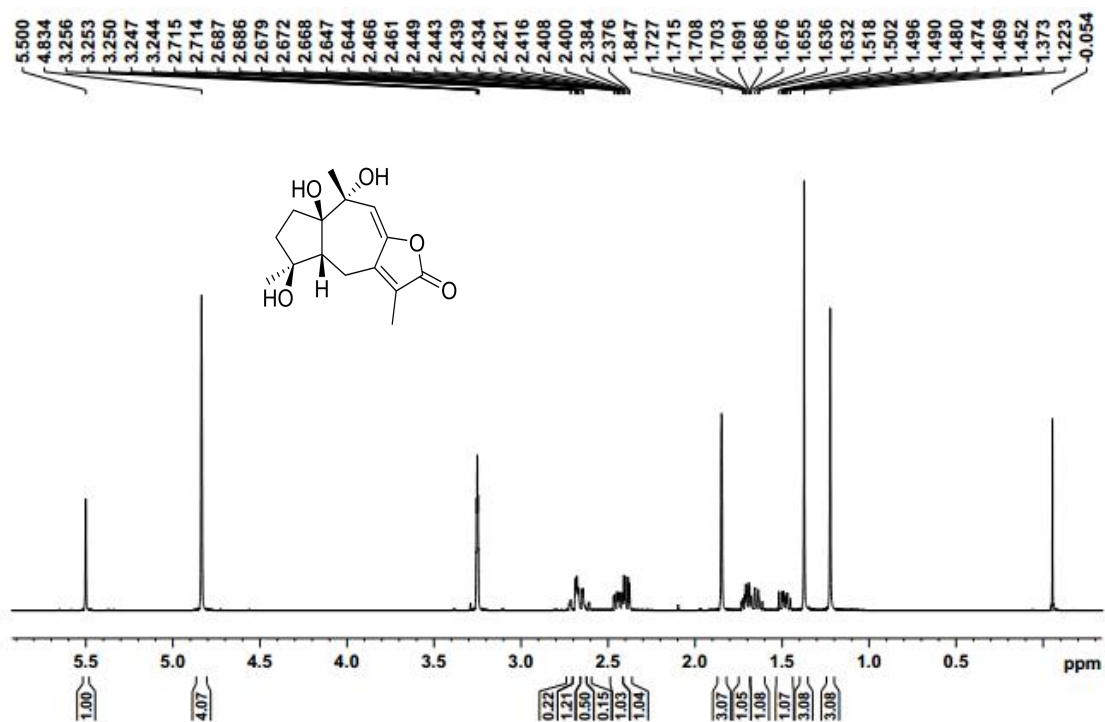

Figure S44. The <sup>1</sup>H NMR Spectrum of Compound 17 in CD3OD

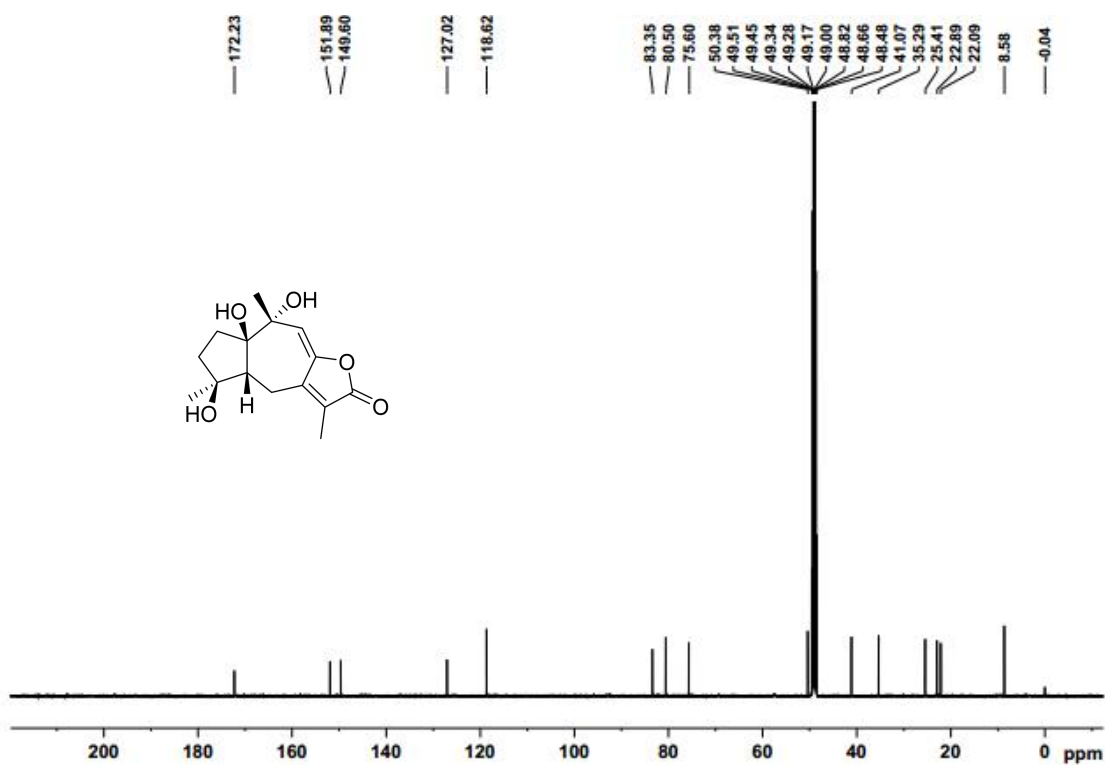

Figure S45. The <sup>13</sup>C NMR Spectrum of Compound 17 in CD3OD

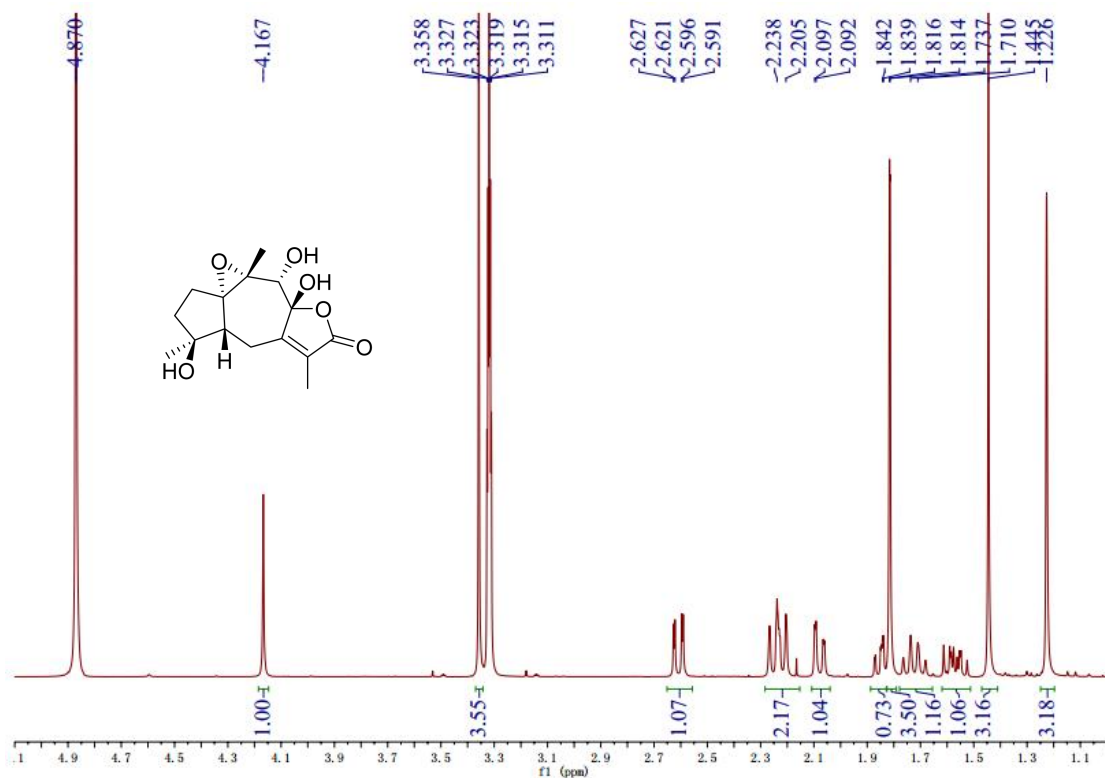

Figure S46. The  $^1\text{H}$  NMR Spectrum of Compound 18 in  $\text{CD}_3\text{OD}$

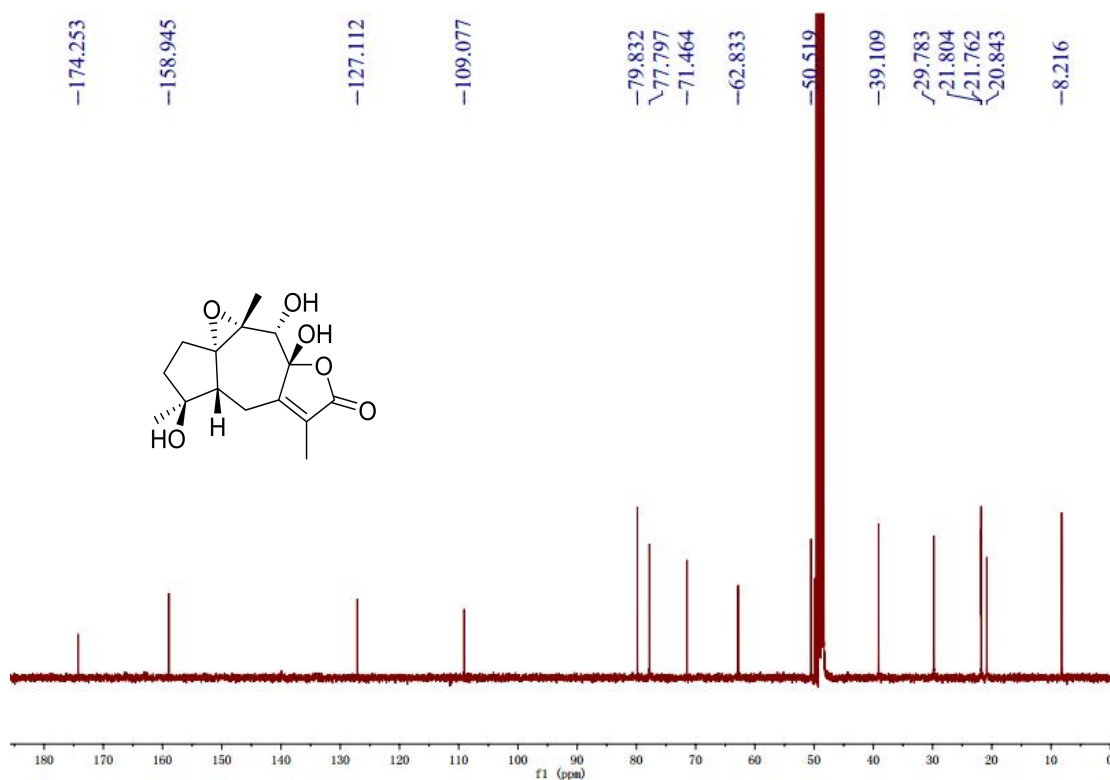

Figure S47. The  $^{13}\text{C}$  NMR Spectrum of Compound 18 in  $\text{CD}_3\text{OD}$

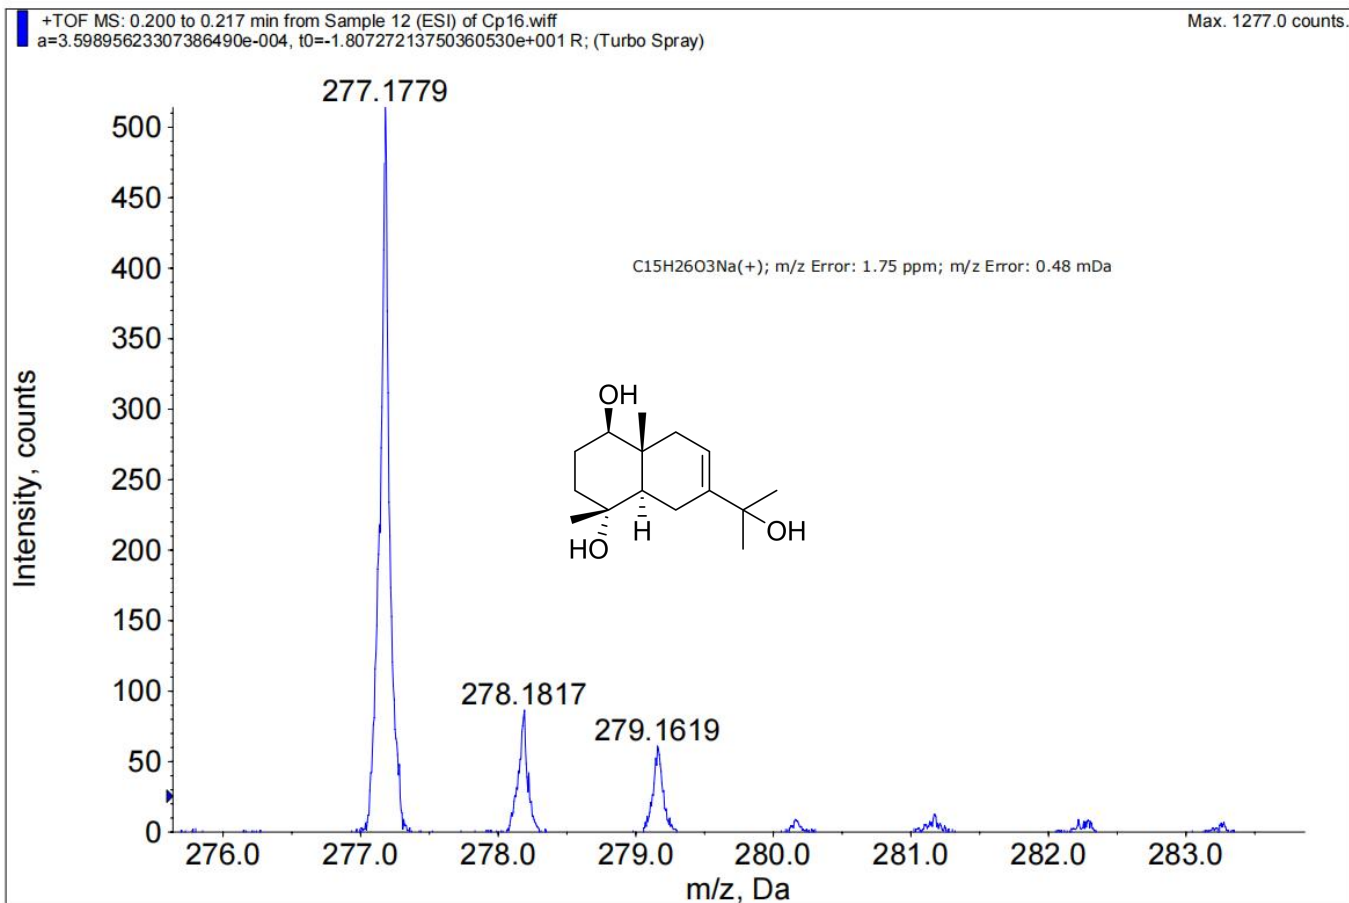

**Figure S48. The HR-ESI-MS Spectrum of Compound 19**

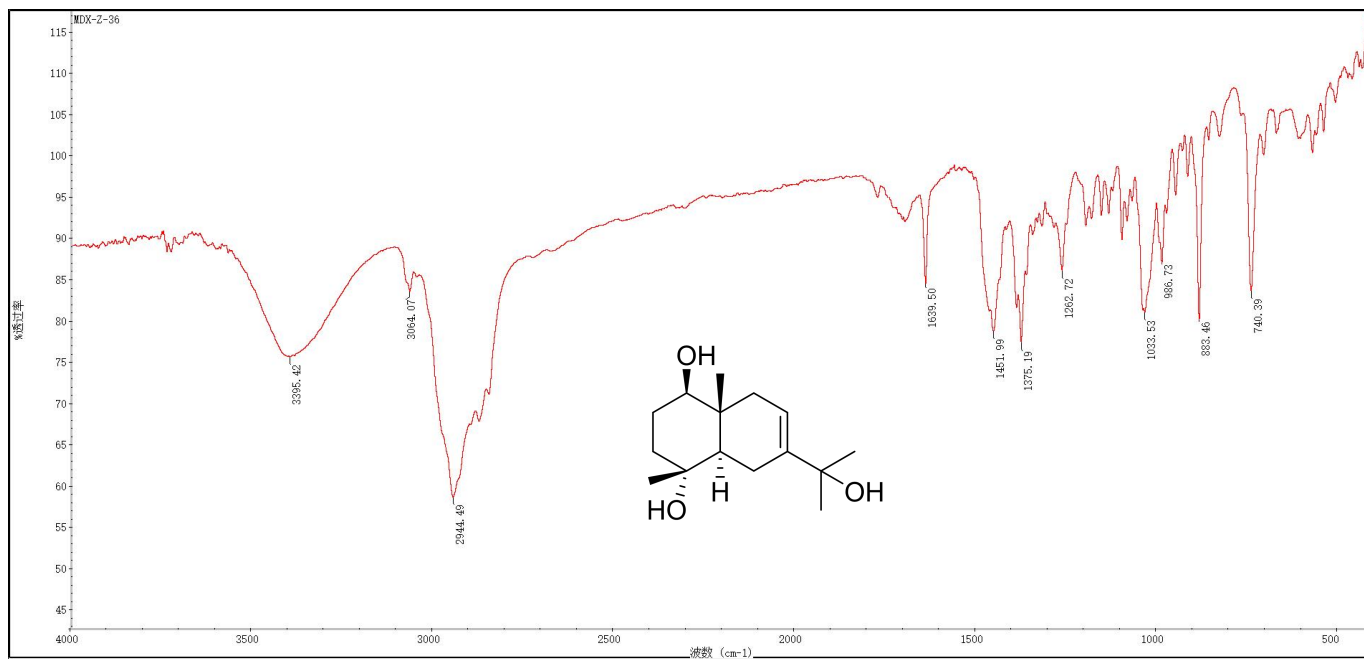

**Figure S49. The IR Spectrum of Compound 19**



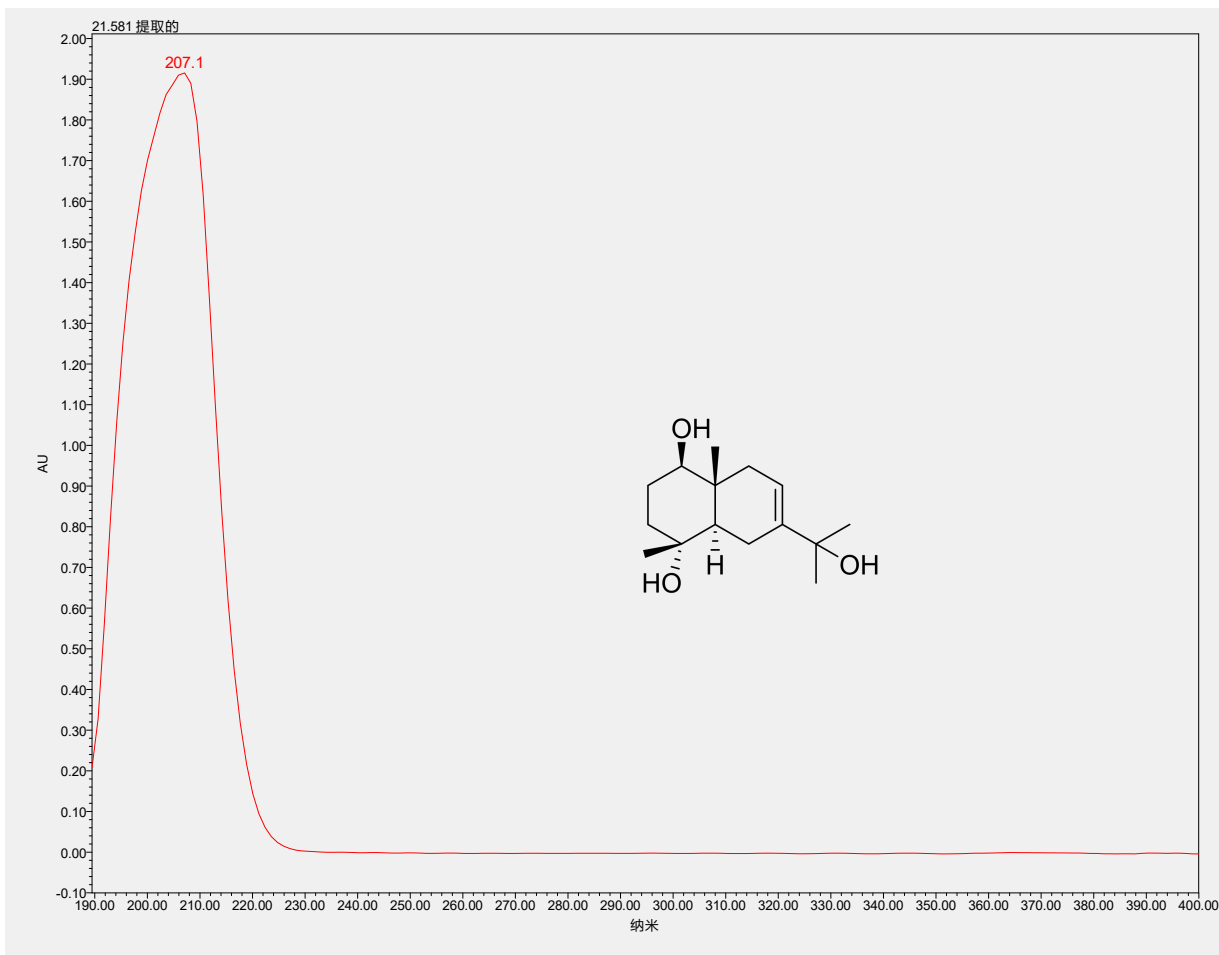

Figure S50. The UV Spectrum of Compound 19

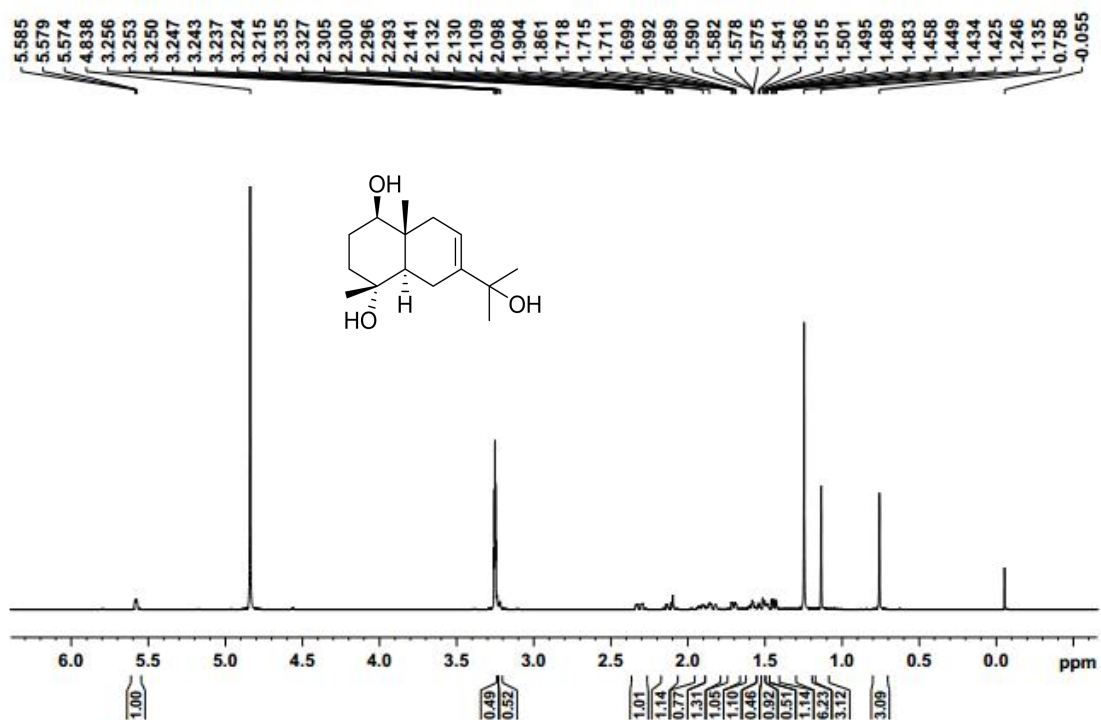

Figure S51. The  $^1\text{H}$  NMR Spectrum of Compound 19 in  $\text{CD}_3\text{OD}$



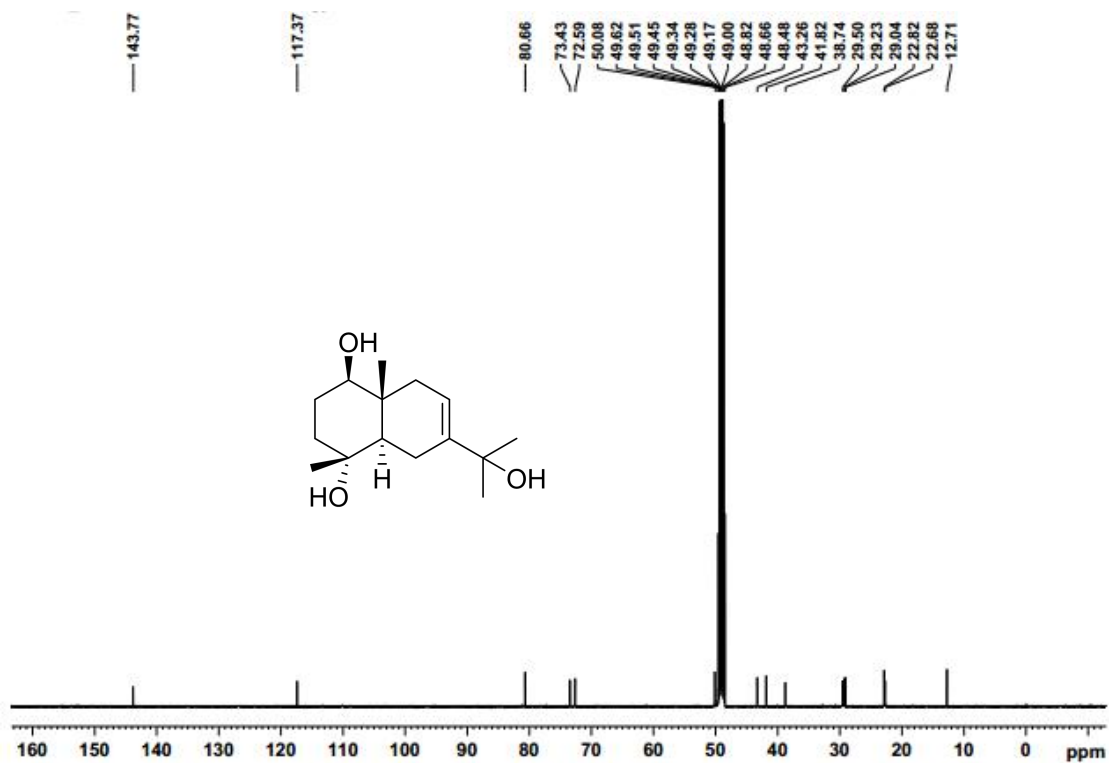

Figure S52. The  $^{13}\text{C}$  NMR Spectrum of Compound 19 in  $\text{CD}_3\text{OD}$

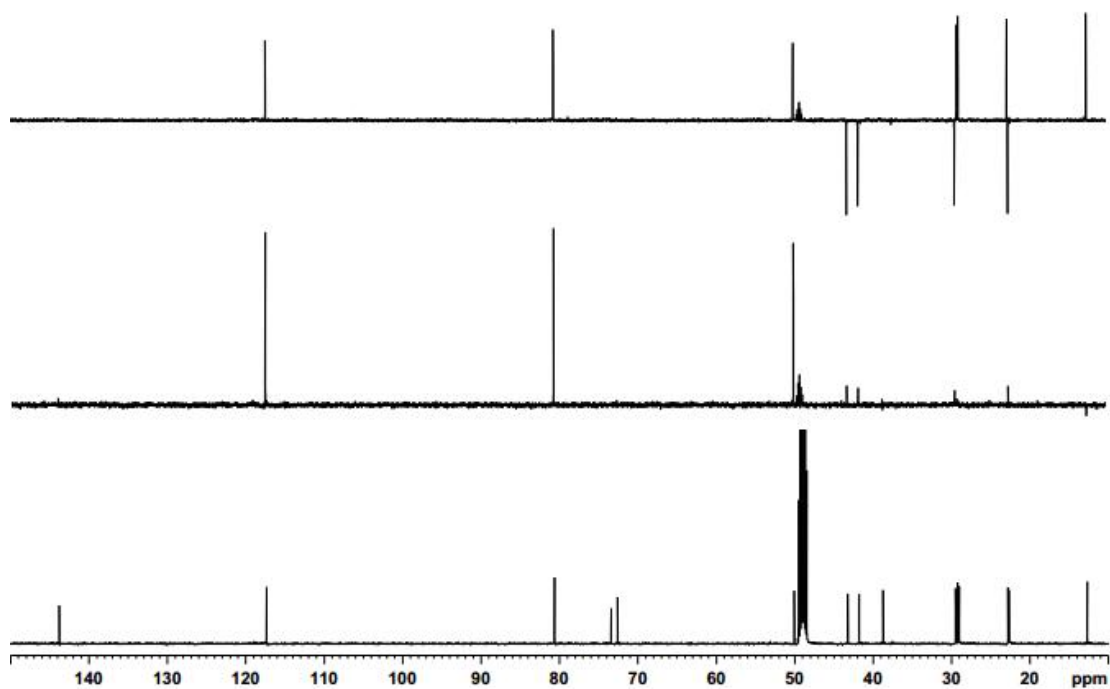

Figure S53. The DEPT Spectrum of Compound 19 in  $\text{CD}_3\text{OD}$

HSQCETGPSI MeOD E:\ beizhongyi 13

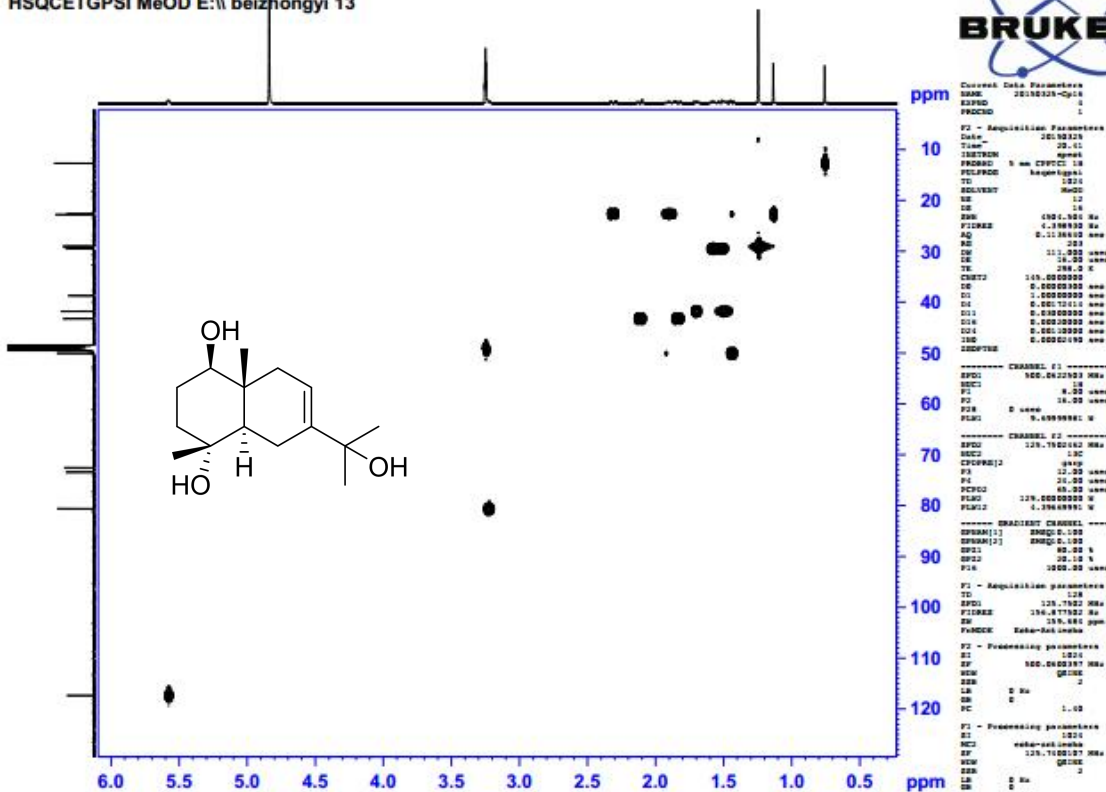

Figure S54. The HSQC Spectrum of Compound 19 in CD3OD

COSYGMFSW MeOD E:\ beizhongyi 13

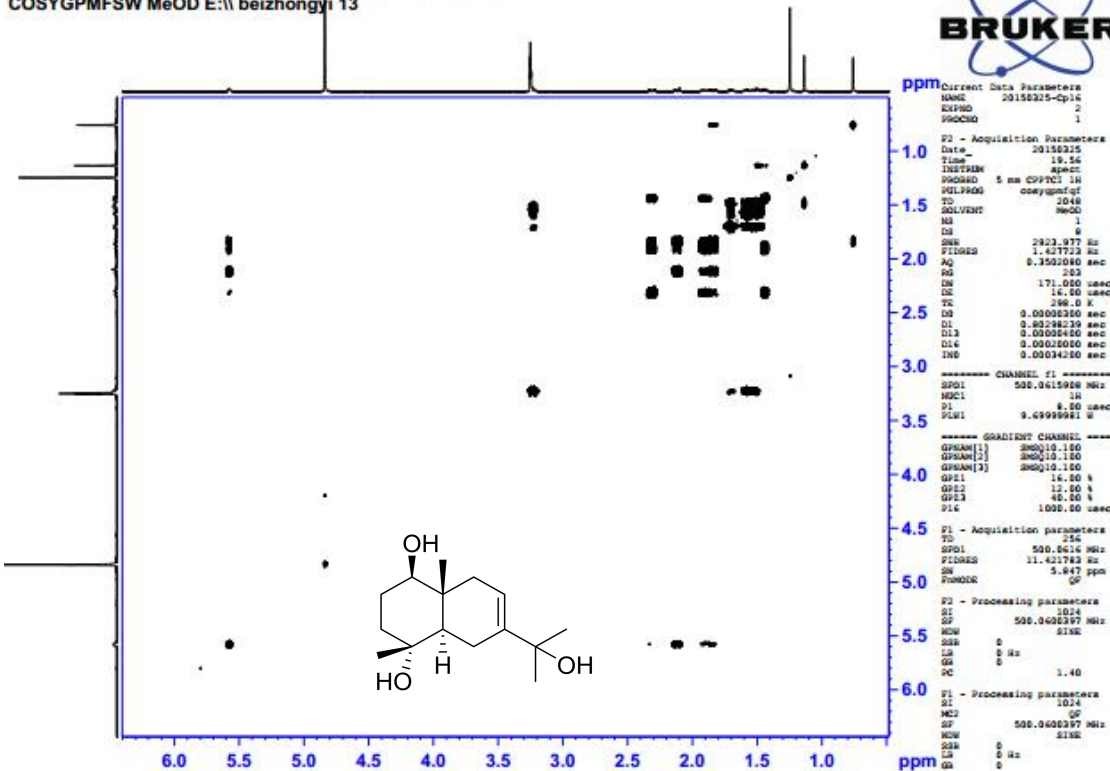

Figure S55. The <sup>1</sup>H-<sup>1</sup>H COSY Spectrum of Compound 19 in CD3OD

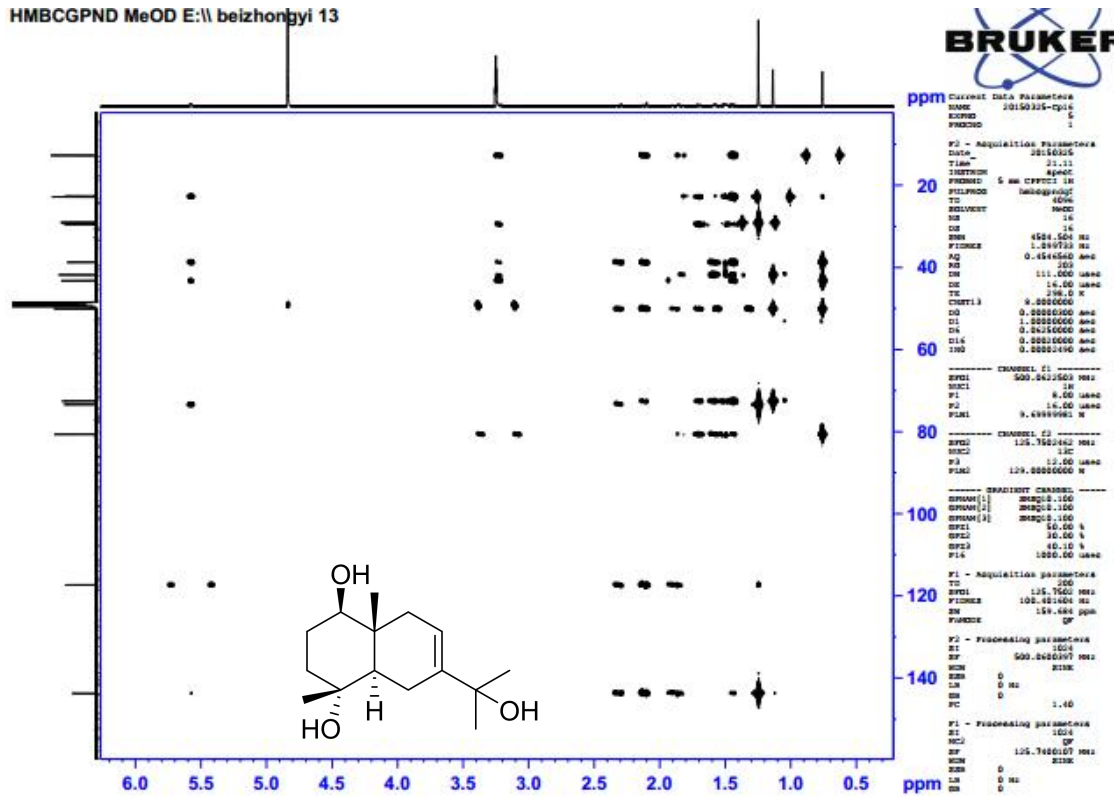

Figure S56. The HMBC Spectrum of Compound 19 in CD3OD

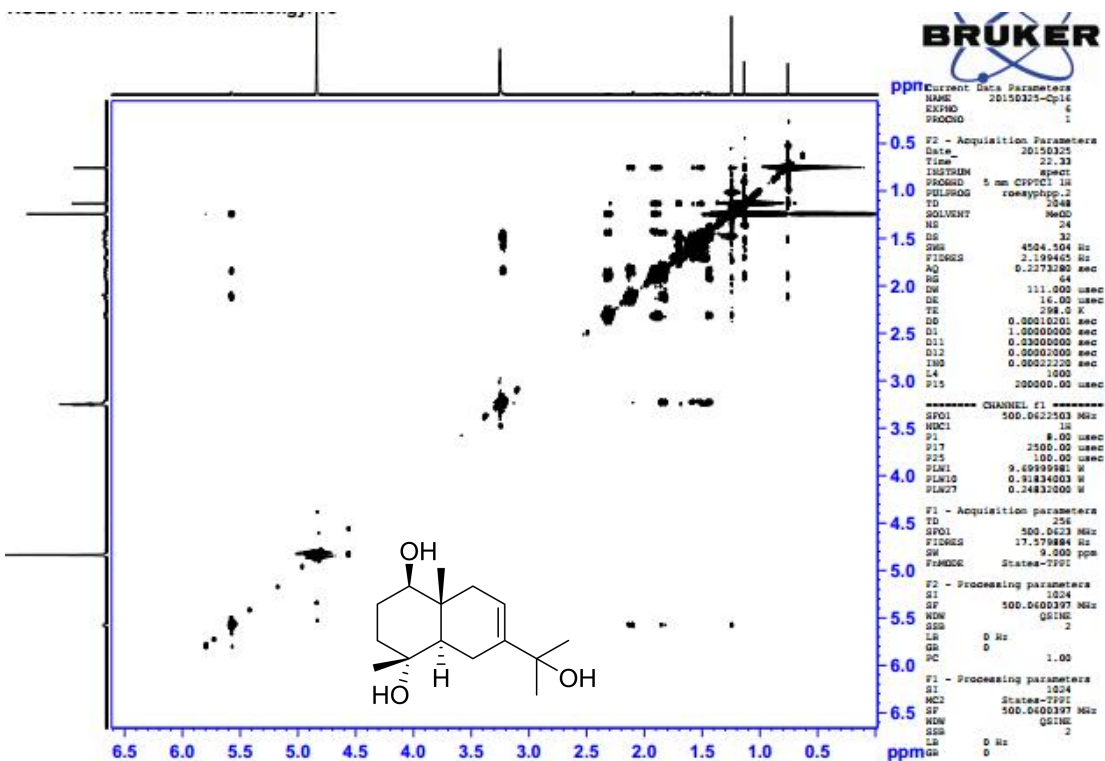

Figure S57. The NOESY Spectrum of Compound 19 in CD3OD

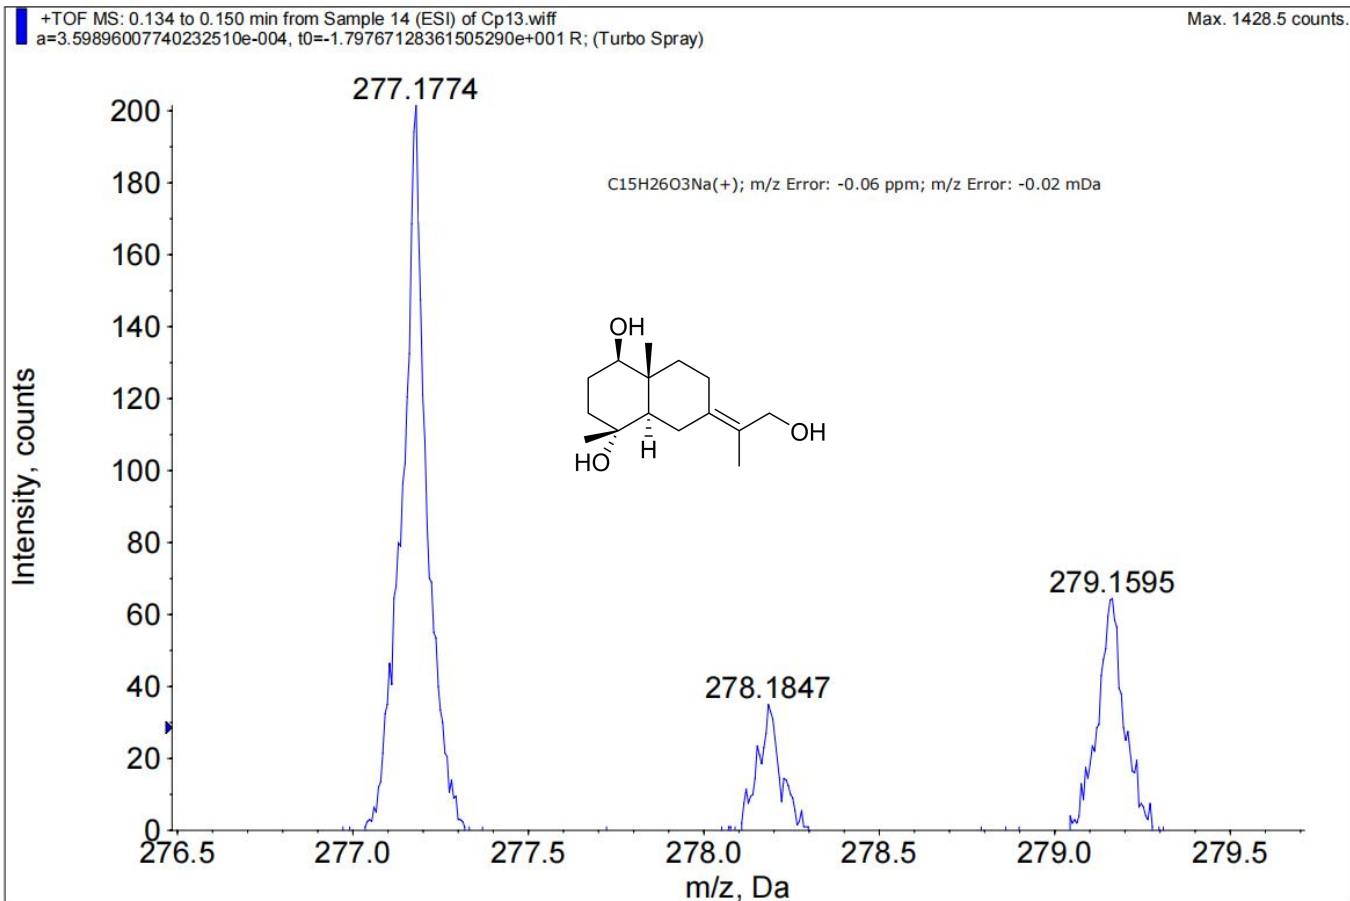

**Figure S58. The HR-ESI-MS Spectrum of Compound 20**

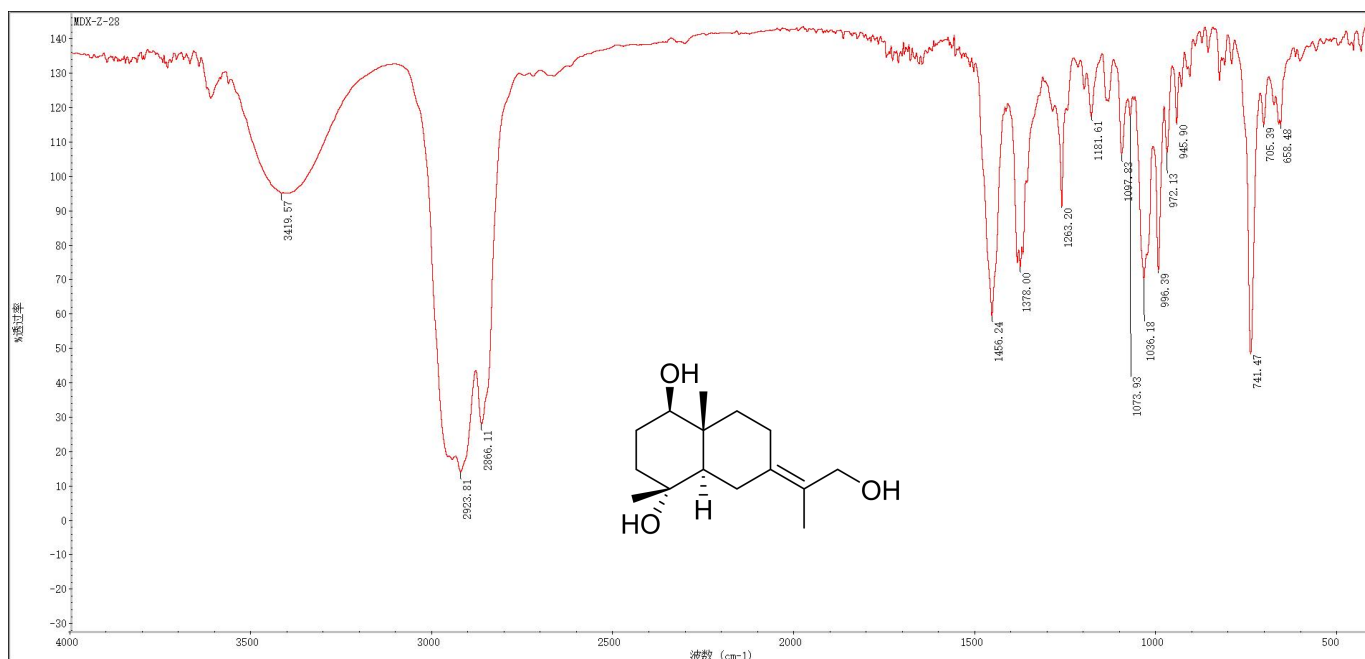

**Figure S59. The IR Spectrum of Compound 20**

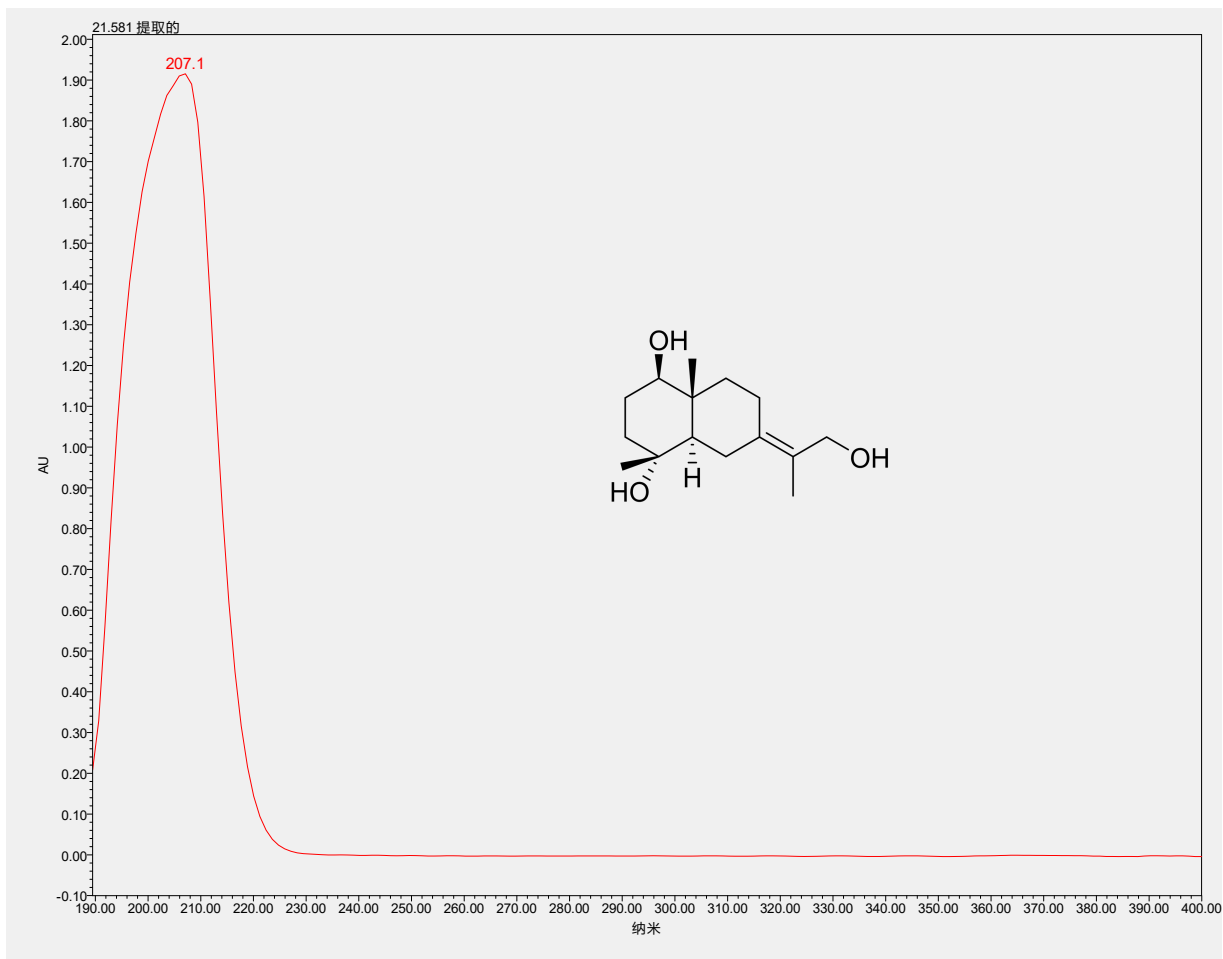

Figure S60. The UV Spectrum of Compound 20

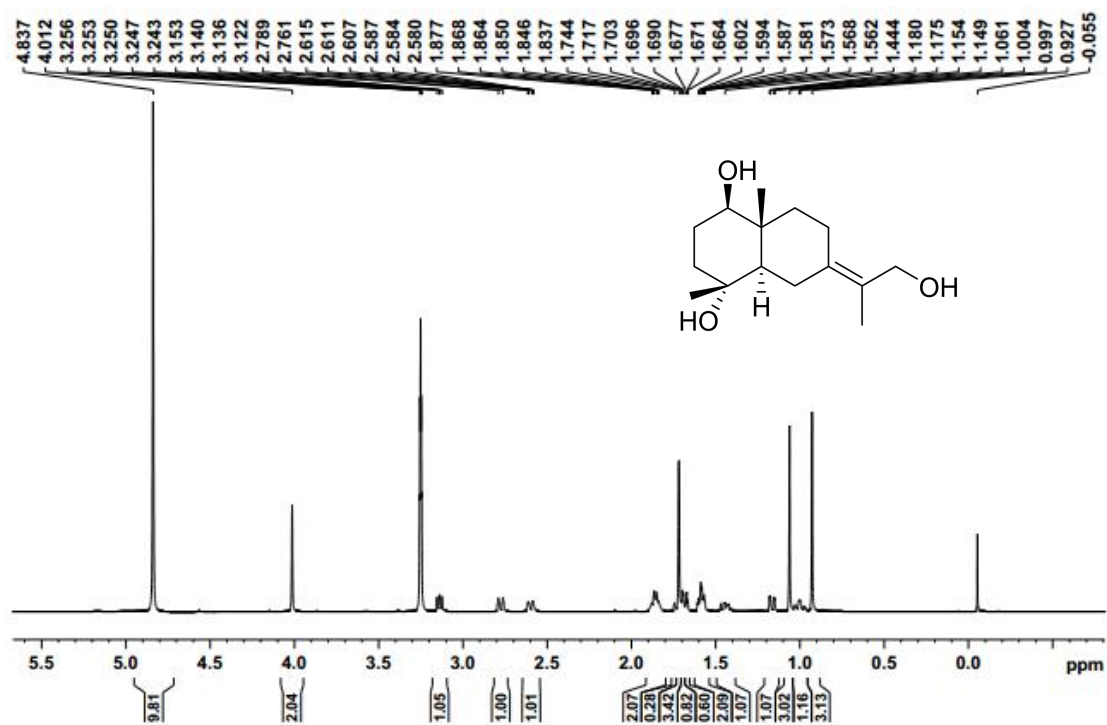

Figure S61. The <sup>1</sup>H NMR Spectrum of Compound 20 in CD<sub>3</sub>OD

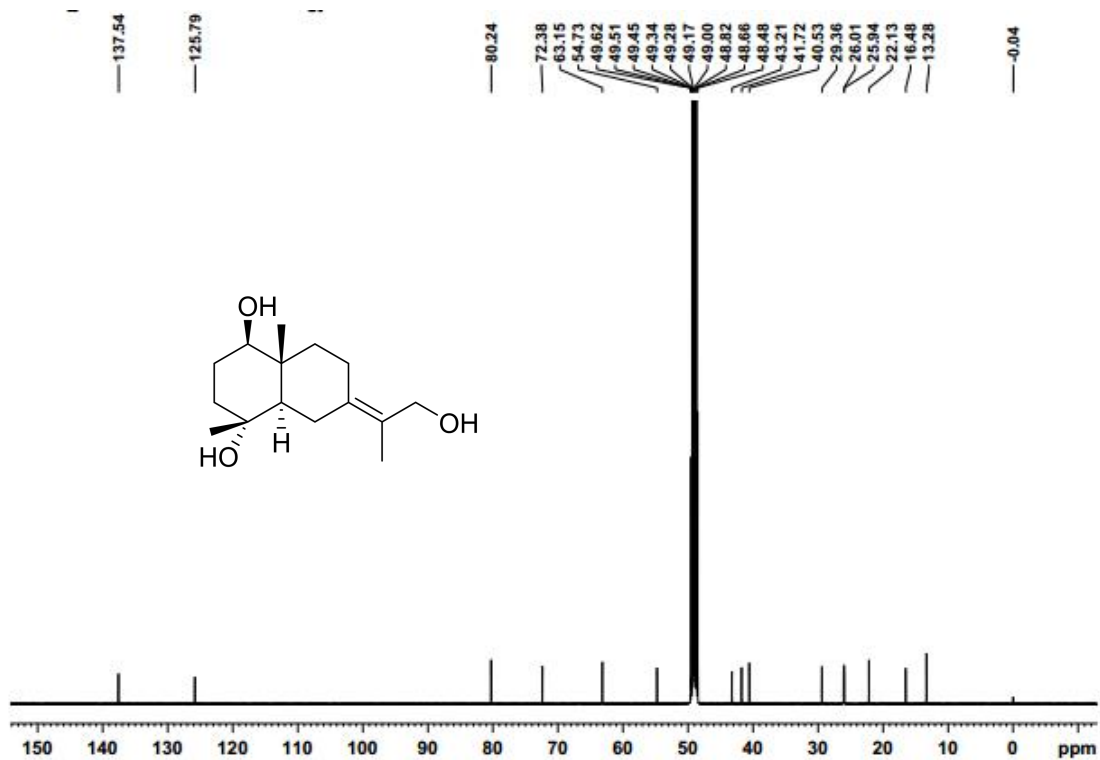

Figure S62. The  $^{13}\text{C}$  NMR Spectrum of Compound 20 in  $\text{CD}_3\text{OD}$

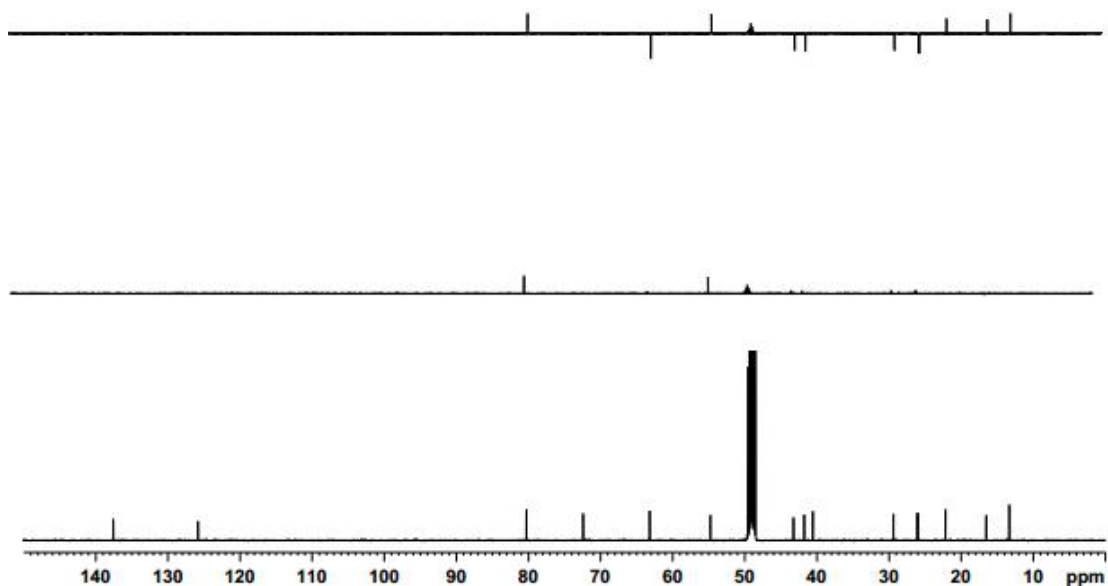

Figure S63. The DEPT Spectrum of Compound 20 in  $\text{CD}_3\text{OD}$



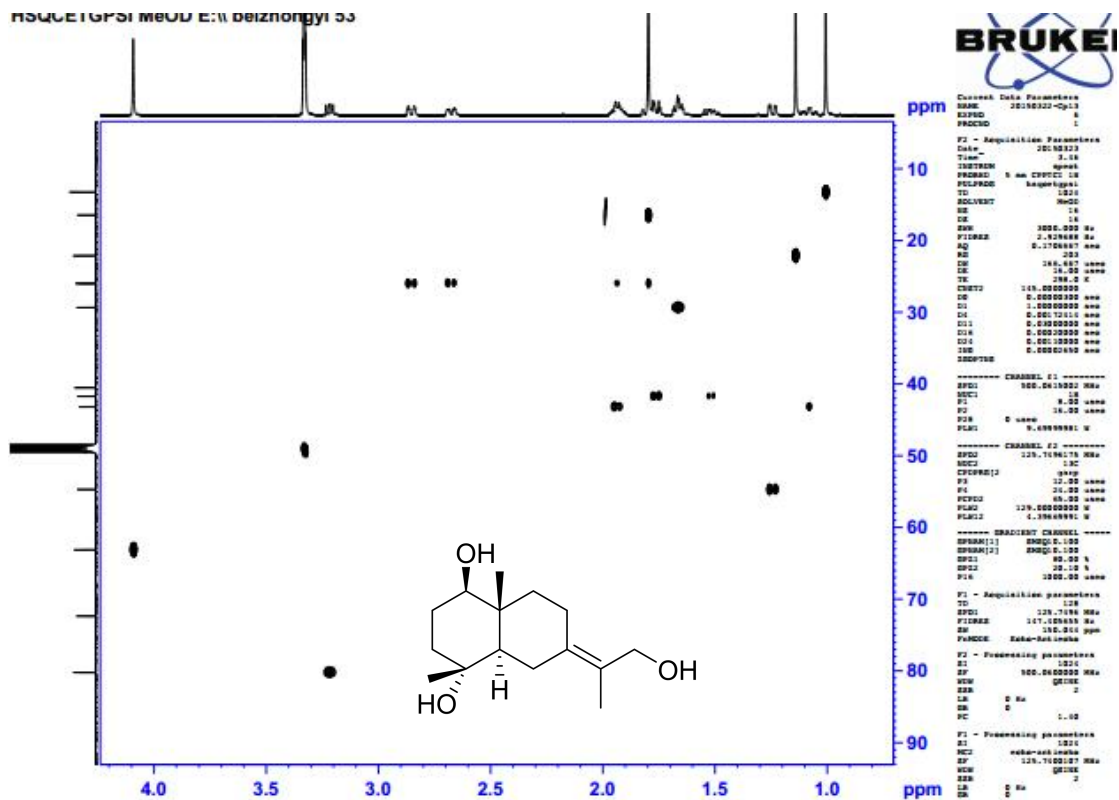

Figure S64. The HSQC Spectrum of Compound 20 in CD3OD

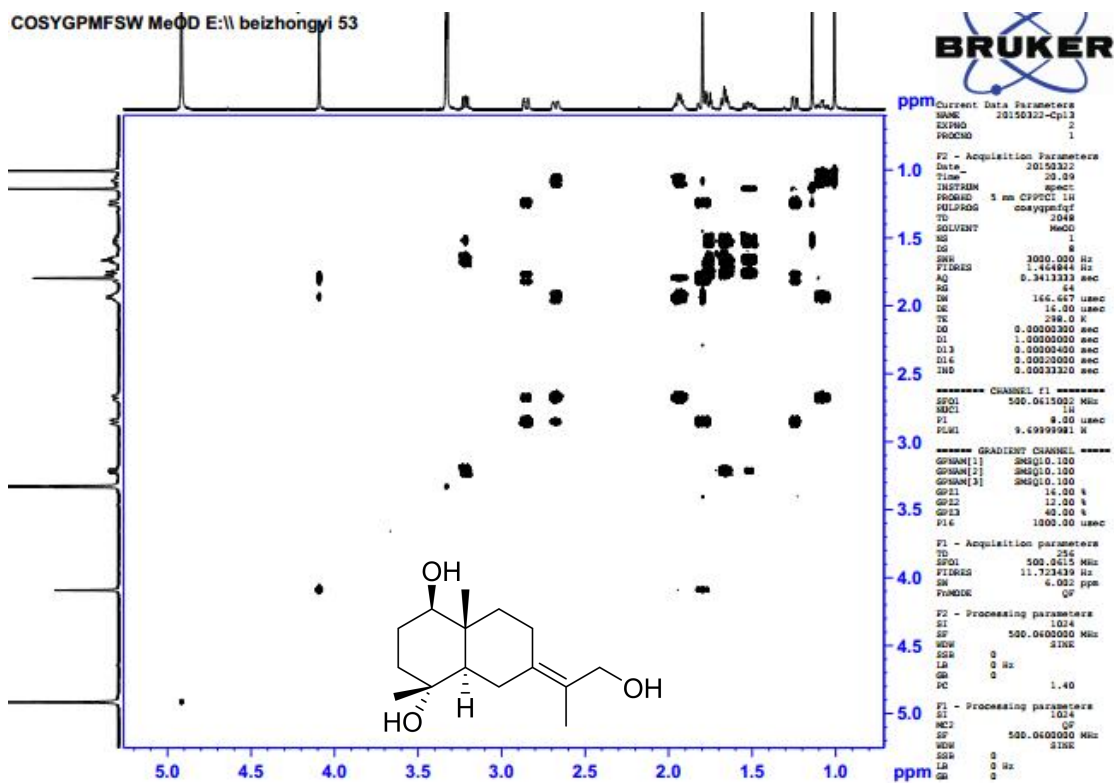

Figure S65. The  $^1\text{H}$ - $^1\text{H}$  COSY Spectrum of Compound 20 in CD3OD

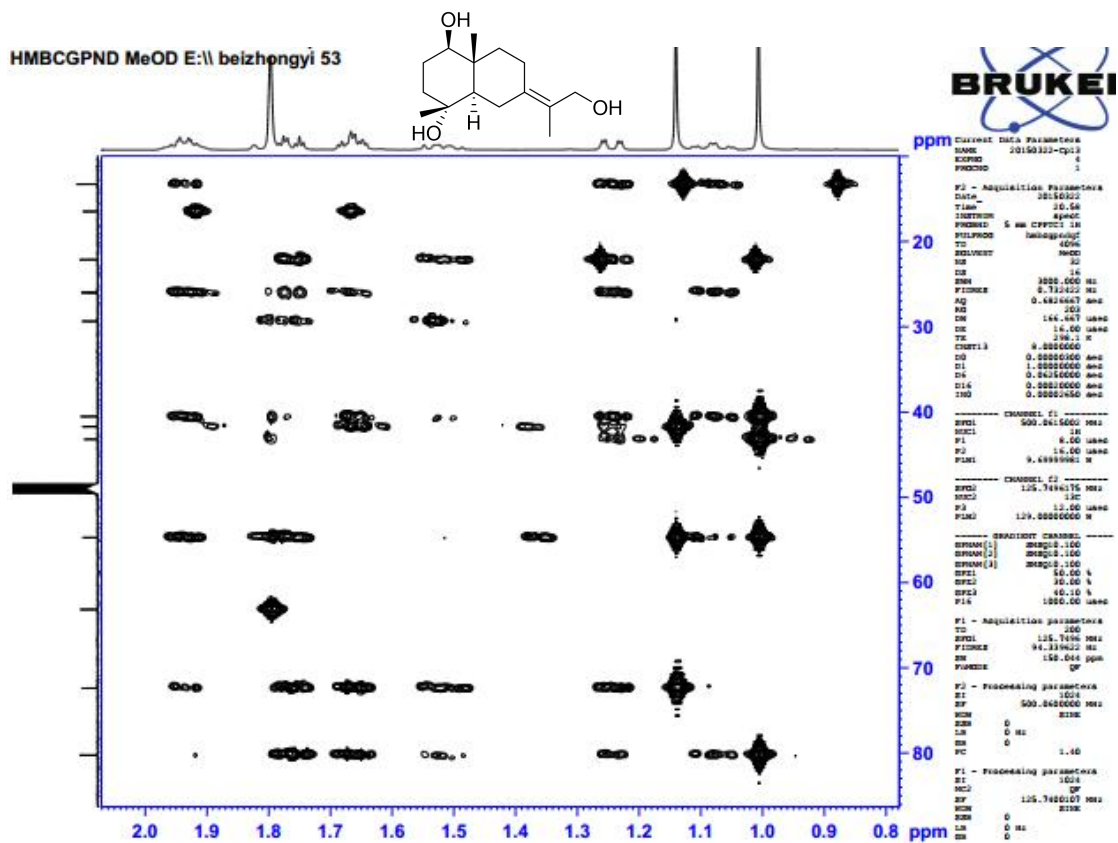

Figure S66. The HMBC Spectrum of Compound 20 in CD3OD

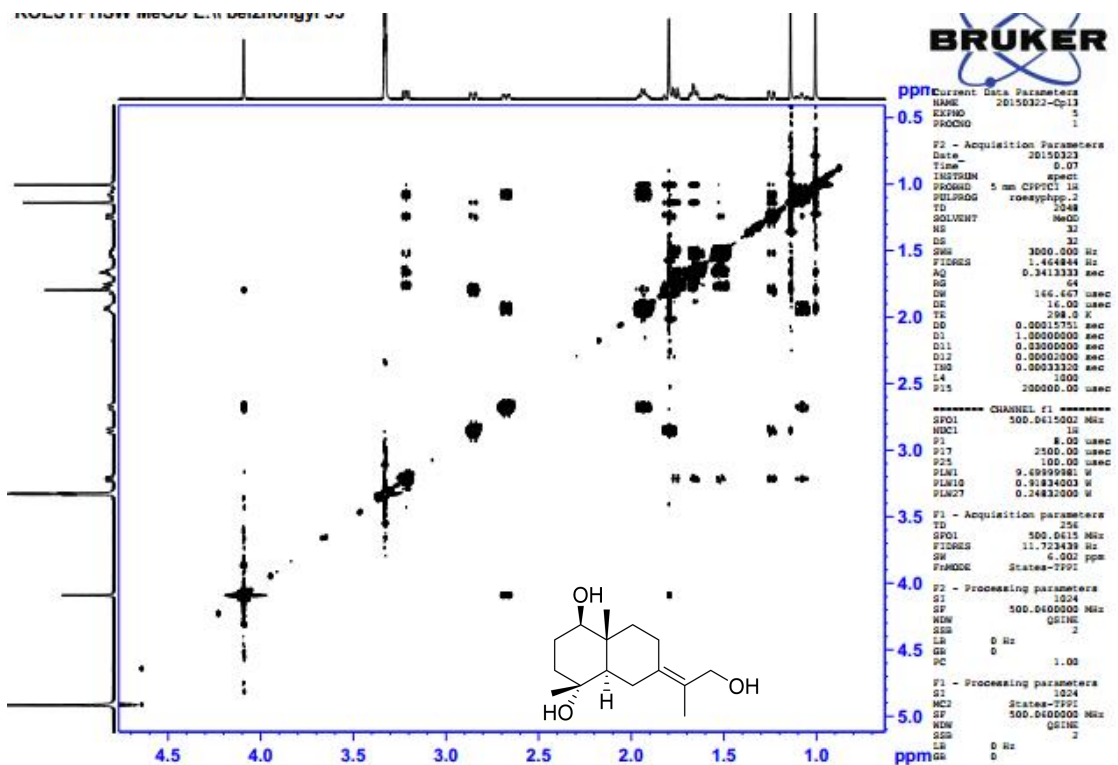

Figure S67. The NOESY Spectrum of Compound 20 in CD3OD



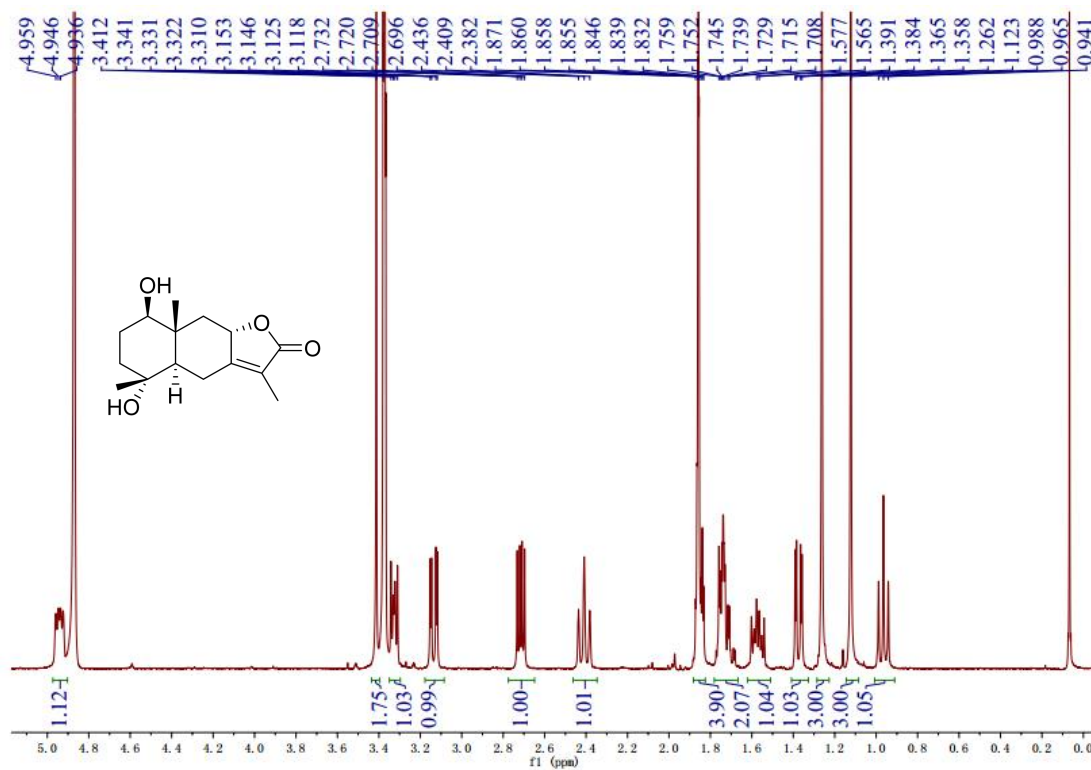

Figure S68. The  $^1\text{H}$  NMR Spectrum of Compound 21 in  $\text{CD}_3\text{OD}$

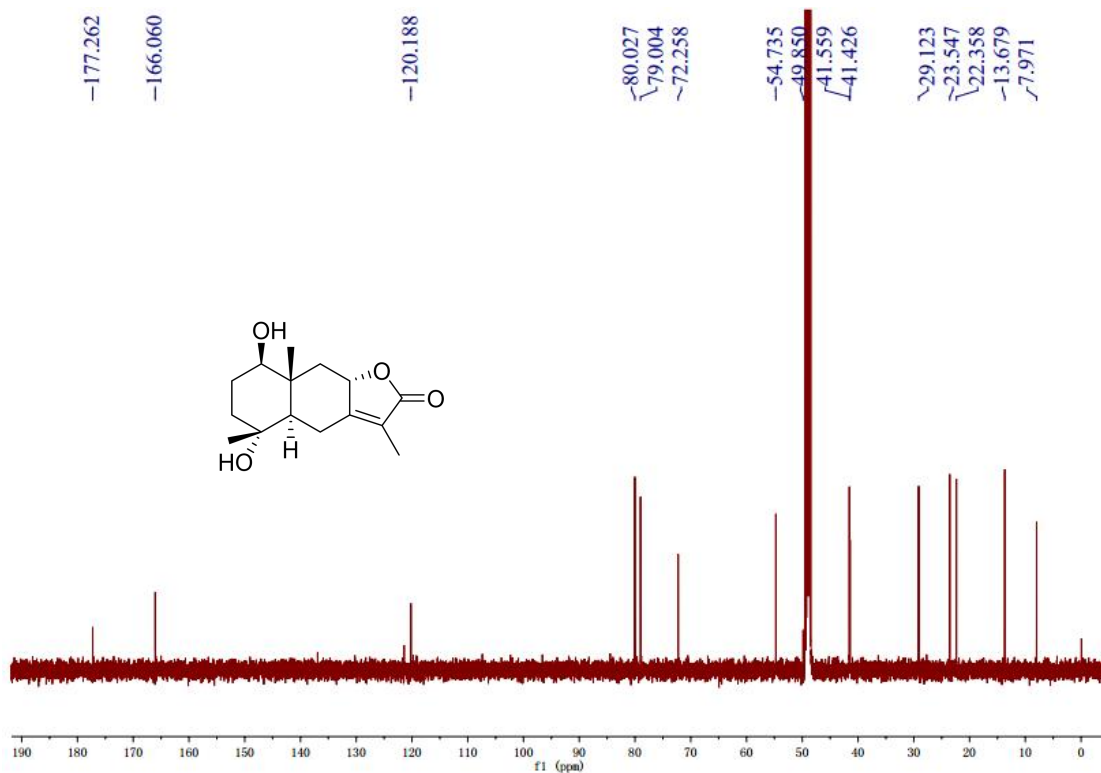

Figure S69. The  $^{13}\text{C}$  NMR Spectrum of Compound 21 in  $\text{CD}_3\text{OD}$

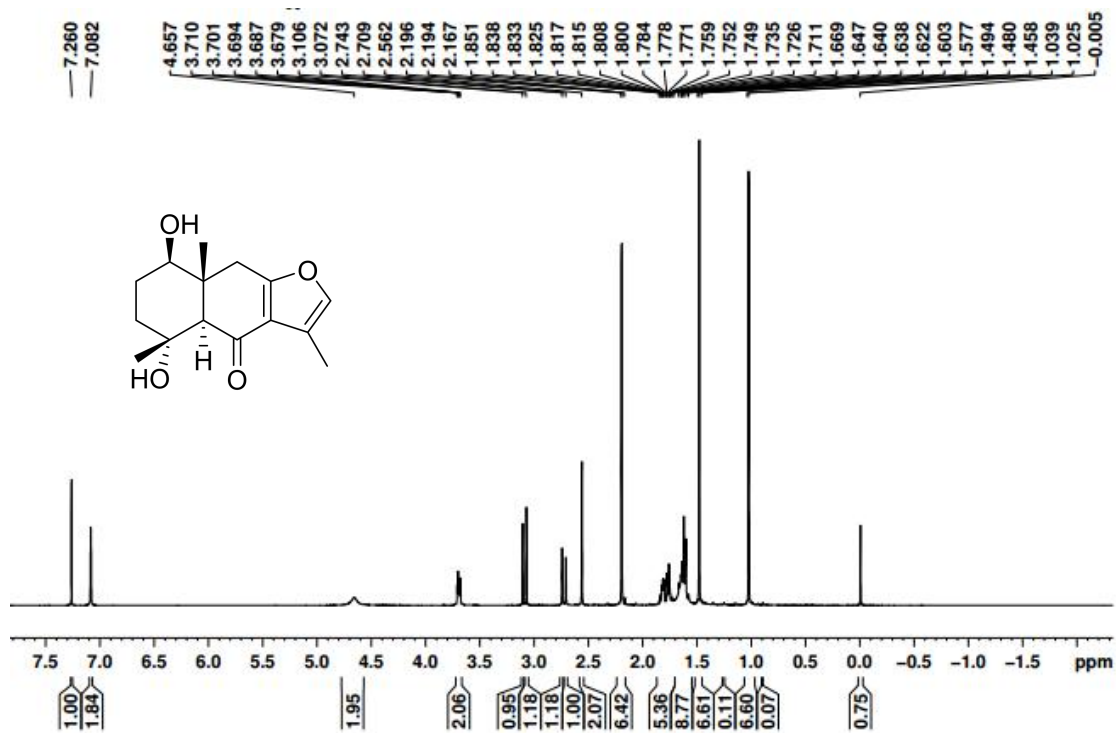

Figure S70. The <sup>1</sup>H NMR Spectrum of Compound 22 in CDCl<sub>3</sub>

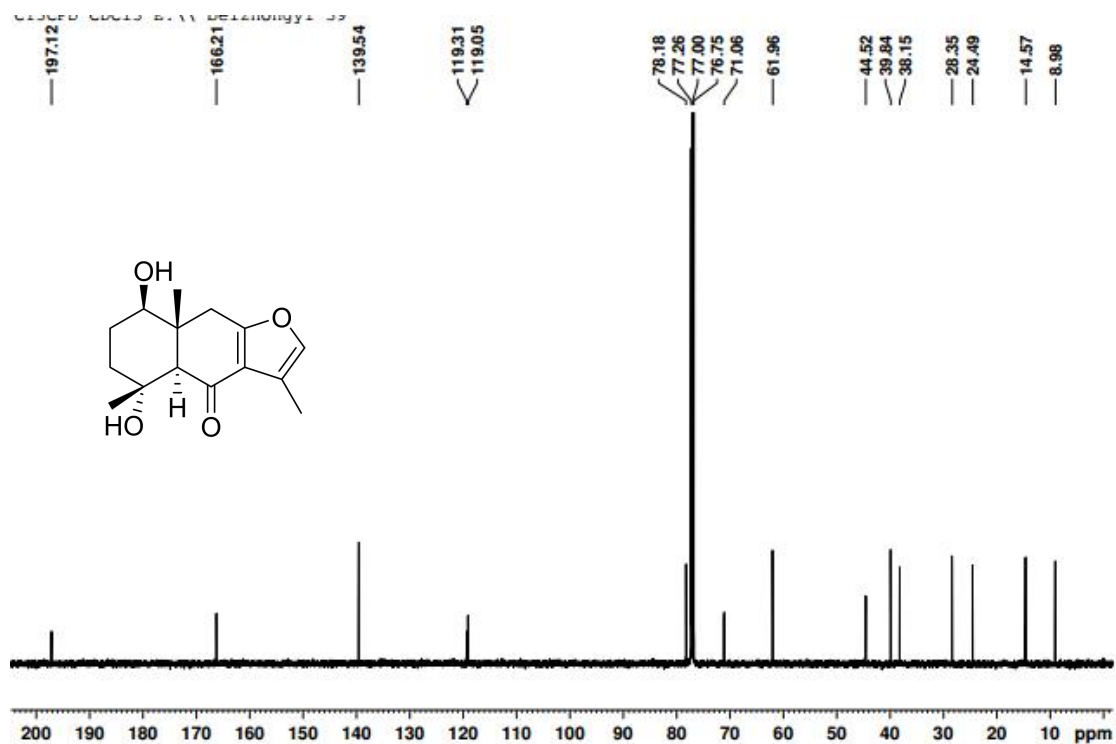

Figure S71. The <sup>13</sup>C NMR Spectrum of Compound 22 in CDCl<sub>3</sub>

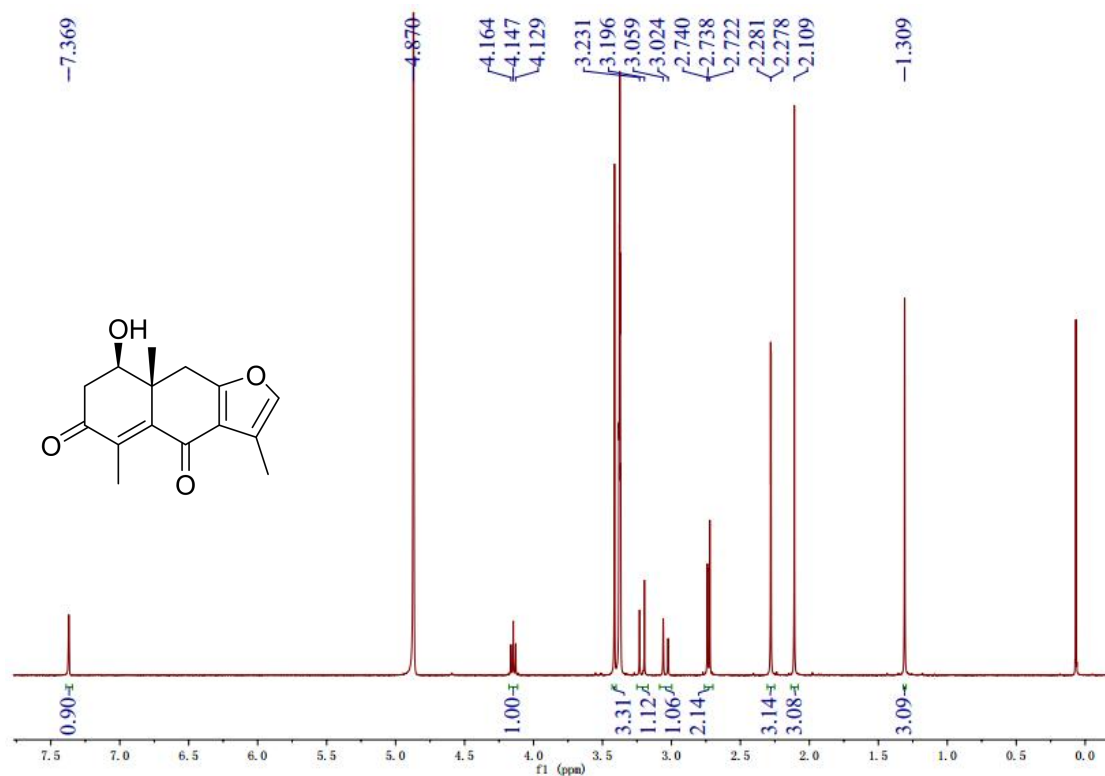

Figure S72. The  $^1\text{H}$  NMR Spectrum of Compound 23 in  $\text{CDCl}_3$

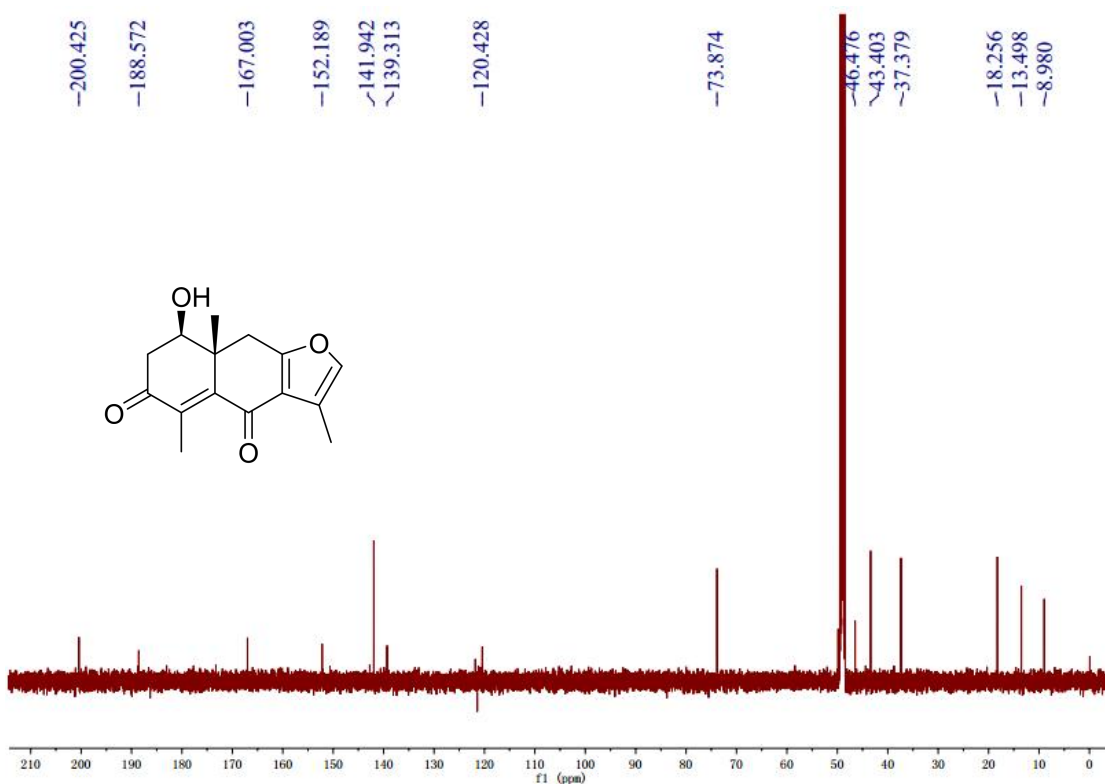

Figure S73. The  $^{13}\text{C}$  NMR Spectrum of Compound 23 in  $\text{CDCl}_3$
